# Supplementary material
Source: publisher figshare collection journal article supplement (https://acs.figshare.com/ndownloader/files/9420061)
Supplement: Supplementary file 1 [file 9420061]

# {Co<sub>4</sub>O<sub>4</sub>} and {Co<sub>x</sub>Ni<sub>4-x</sub>O<sub>4</sub>} cubane water oxidation catalysts as surface cut-outs of cobalt oxides

Fangyuan Song, René Moré, Mauro Schilling, Grigory Smolentsev, Nicolo Azzaroli, Thomas Fox,  
Sandra Lubner, and Greta R. Patzke\*

## *Supporting Information*

|                                                                                                                                                                                                                         |     |
|-------------------------------------------------------------------------------------------------------------------------------------------------------------------------------------------------------------------------|-----|
| <b>Analytical characterization.</b>                                                                                                                                                                                     | S3  |
| <b>Experimental section and methods.</b>                                                                                                                                                                                |     |
| • Materials                                                                                                                                                                                                             | S4  |
| • Synthesis of Co <sub>x</sub> Ni <sub>4-x</sub> O <sub>4</sub> -dpk (0 ≤ x ≤ 4), Co <sub>4</sub> O <sub>4</sub> -dpk (OAc-d <sub>3</sub> ), mono-Co-dpk, and [Ru(bpy) <sub>3</sub> ](ClO <sub>4</sub> ) <sub>3</sub> . | S4  |
| • Analytical data of Co <sub>4</sub> O <sub>4</sub> -dpk, Co <sub>x</sub> Ni <sub>4-x</sub> O <sub>4</sub> -dpk, and Ni <sub>4</sub> O <sub>4</sub> -dpk.                                                               | S5  |
| • Photocatalytic water oxidation                                                                                                                                                                                        | S5  |
| • Recycling tests                                                                                                                                                                                                       | S5  |
| • <sup>18</sup> O labeling experiments                                                                                                                                                                                  | S6  |
| • pH-dependent UV/vis titrations                                                                                                                                                                                        | S6  |
| • Cyclic voltammetry                                                                                                                                                                                                    | S6  |
| • Acetate ligand exchange study                                                                                                                                                                                         | S6  |
| • Ligation study of {Co <sub>2</sub> O <sub>2</sub> (OH) <sub>2</sub> }                                                                                                                                                 | S6  |
| • X-ray absorption spectroscopy                                                                                                                                                                                         | S6  |
| • Chemical water oxidation with Co <sub>4</sub> O <sub>4</sub> -dpk                                                                                                                                                     | S7  |
| • Crystallographic information and structural description of Co <sub>4</sub> O <sub>4</sub> -dpk                                                                                                                        | S7  |
| <b>Table S1.</b> Crystallographic and structural refinement data of [Co <sub>4</sub> (dpv{OH}O) <sub>4</sub> (OAc) <sub>2</sub> (H <sub>2</sub> O) <sub>2</sub> ](ClO <sub>4</sub> ) <sub>2</sub> .                     | S8  |
| <b>Table S2.</b> Selected bond lengths and distances of Co <sub>4</sub> O <sub>4</sub> -dpk.                                                                                                                            | S8  |
| <b>Table S3.</b> Bond valence sum (BVS) calculation for Co in Co <sub>4</sub> O <sub>4</sub> -dpk.                                                                                                                      | S9  |
| <b>Figure S1.</b> ORTEP and structural representations of Co <sub>4</sub> O <sub>4</sub> -dpk.                                                                                                                          | S9  |
| <b>Figure S2.</b> TG characterizations of Co <sub>4</sub> O <sub>4</sub> -dpk, the Co <sub>x</sub> Ni <sub>4-x</sub> O <sub>4</sub> -dpk series, and Ni <sub>4</sub> O <sub>4</sub> -dpk.                               | S10 |
| <b>Figure S3.</b> HR-ESI-MS spectrum of Co <sub>4</sub> O <sub>4</sub> -dpk.                                                                                                                                            | S10 |
| <b>Figure S4.</b> FT-IR spectra of Co <sub>4</sub> O <sub>4</sub> -dpk, Ni <sub>4</sub> O <sub>4</sub> -dpk, and the Co <sub>x</sub> Ni <sub>4-x</sub> O <sub>4</sub> -dpk series.                                      | S11 |
| <b>Figure S5.</b> Time dependent UV/vis spectra of Co <sub>4</sub> O <sub>4</sub> -dpk in pH 8.5, 80 mM borate buffer solution.                                                                                         | S11 |
| <b>Figure S6.</b> pH dependent UV/vis spectra of Co <sub>4</sub> O <sub>4</sub> -dpk and the corresponding titration curve.                                                                                             | S12 |
| <b>Figure S7.</b> Cyclic voltammograms of Co <sub>4</sub> O <sub>4</sub> -dpk in the pH range of 4-11.                                                                                                                  | S13 |
| <b>Figure S8.</b> Cyclic voltammograms of 1 mM Co <sub>4</sub> O <sub>4</sub> -dpk in the pH range of 7.0-9.0.                                                                                                          | S13 |
| <b>Figure S9.</b> Pourbaix diagram of Co <sub>4</sub> O <sub>4</sub> -dpk in the pH range of 7 - 9.                                                                                                                     | S14 |
| <b>Figure S10.</b> Cyclic voltammograms of 1 mM Co <sub>4</sub> O <sub>4</sub> -dpk and 1 mM [Ru(bpy) <sub>3</sub> ]Cl <sub>2</sub> .                                                                                   | S14 |
| <b>Figure S11.</b> PXRD pattern of Co <sub>4</sub> O <sub>4</sub> -dpk(OAc-d <sub>3</sub> ).                                                                                                                            | S15 |
| <b>Figure S12.</b> <sup>1</sup> H NMR spectrum of Co <sub>4</sub> O <sub>4</sub> -dpk in CD <sub>3</sub> CN.                                                                                                            | S15 |
| <b>Figure S13.</b> <sup>1</sup> H NMR spectrum of Co <sub>4</sub> O <sub>4</sub> -dpk immediately after D <sub>2</sub> O addition and after an interval of 30 h.                                                        | S16 |
| <b>Figure S14.</b> Clark electrode kinetics of various concentrations of Co <sub>4</sub> O <sub>4</sub> -dpk.                                                                                                           | S16 |
| <b>Figure S15.</b> Photocatalytic water oxidation of Co <sub>4</sub> O <sub>4</sub> -dpk in different borate buffer concentrations.                                                                                     | S17 |
| <b>Figure S16.</b> Clark electrode kinetics: Co <sub>4</sub> O <sub>4</sub> -dpk, [Co <sub>4</sub> (dpv{OH}O) <sub>4</sub> (OAc) <sub>3</sub> (H <sub>2</sub> O)](ClO <sub>4</sub> ), mono-Co-dpk.                      | S17 |
| <b>Figure S17.</b> Photocatalytic water oxidation performance of Co <sub>4</sub> O <sub>4</sub> -dpk, NaClO <sub>4</sub> , and references.                                                                              | S18 |
| <b>Table S4.</b> Photocatalytic water oxidation performance with different Co <sub>4</sub> O <sub>4</sub> -dpk concentrations.                                                                                          | S18 |
| <b>Table S5.</b> Photocatalytic water oxidation performance of Co <sub>4</sub> O <sub>4</sub> -dpk in different buffer solutions.                                                                                       | S18 |
| <b>Table S6.</b> Photocatalytic water oxidation of Co <sub>4</sub> O <sub>4</sub> -dpk in different borate buffer concentrations.                                                                                       | S19 |
| <b>Figure S18.</b> PXRD pattern and FT-IR spectra of Co <sub>4</sub> O <sub>4</sub> -dpk synthesized from borate buffer.                                                                                                | S19 |

|                                                                                                                                                                                                                                               |     |
|-----------------------------------------------------------------------------------------------------------------------------------------------------------------------------------------------------------------------------------------------|-----|
| <b>Figure S19.</b> Time-dependent FT-IR spectra of <b>Co<sub>4</sub>O<sub>4</sub>-dpk</b> in pH 8.5, 80 mM borate buffer.                                                                                                                     | S19 |
| <b>Figure S20.</b> Clark electrode kinetics of activity recycling tests of <b>Co<sub>4</sub>O<sub>4</sub>-dpk</b> vs. Co(OAc) <sub>2</sub> .                                                                                                  | S20 |
| <b>Figure S21.</b> Clark electrode kinetics of filtered post-catalytic solutions with <b>Co<sub>4</sub>O<sub>4</sub>-dpk</b> vs. Co(OAc) <sub>2</sub> .                                                                                       | S20 |
| <b>Figure S22.</b> DLS measurement of the post-catalytic reaction solution of <b>Co<sub>4</sub>O<sub>4</sub>-dpk</b> .                                                                                                                        | S21 |
| <b>Figure S23.</b> Clark electrode kinetics of Chelex tests for <b>Co<sub>4</sub>O<sub>4</sub>-dpk</b> vs. Co(OAc) <sub>2</sub> .                                                                                                             | S21 |
| <b>Figure S24.</b> FT-IR spectra of <b>Co<sub>4</sub>O<sub>4</sub>-dpk</b> in formamide and formamide containing phosphate.                                                                                                                   | S22 |
| <b>Table S7.</b> EXAFS fit results for <b>Co<sub>4</sub>O<sub>4</sub>-dpk</b> after photocatalytic oxygen evolution.                                                                                                                          | S22 |
| <b>Figure S25.</b> Kinetics of <b>Co<sub>4</sub>O<sub>4</sub>-dpk</b> catalyzed chemical water oxidation with [Ru(bpy) <sub>3</sub> ](ClO <sub>4</sub> ) <sub>3</sub> .                                                                       | S23 |
| <b>Figure S26.</b> Kinetics of <b>Co<sub>4</sub>O<sub>4</sub>-dpk</b> catalyzed chemical water oxidation with 1 - 5 eq of [Ru(bpy) <sub>3</sub> ](ClO <sub>4</sub> ) <sub>3</sub> .                                                           | S23 |
| <b>Figure S27.</b> UV/vis kinetics of <b>Co<sub>4</sub>O<sub>4</sub>-dpk</b> catalyzed chemical water oxidation with [Ru(bpy) <sub>3</sub> ](ClO <sub>4</sub> ) <sub>3</sub> .                                                                | S24 |
| <b>Figure S28.</b> <sup>1</sup> H NMR spectra of [(NH <sub>3</sub> ) <sub>4</sub> Co(III)sal]Cl and [(NH <sub>3</sub> ) <sub>4</sub> Co(IV)sal-NO <sub>2</sub> ]ClNO <sub>3</sub> .                                                           | S24 |
| <b>Figure S29.</b> Comparison of the edge position and white line for different cobalt containing samples.                                                                                                                                    | S25 |
| <b>Figure S30.</b> Normalized XANES spectra of cobalt amino salicylic acid complexes and 1 <sup>st</sup> derivative.                                                                                                                          | S25 |
| <b>Figure S31.</b> White line position of XANES measurement of 100 μM <b>Co<sub>4</sub>O<sub>4</sub>-dpk</b> in borate buffer.                                                                                                                | S26 |
| <b>Figure S32.</b> Cobalt K-edge XANES spectra of <b>Co<sub>4</sub>O<sub>4</sub>-dpk</b> oxidized by [Ru(bpy) <sub>3</sub> ](ClO <sub>4</sub> ) <sub>3</sub> at 40 K.                                                                         | S26 |
| <b>Figure S33.</b> Mass spectra of <b>Co<sub>4</sub>O<sub>4</sub>-dpk</b> assisted O <sub>2</sub> evolution with H <sub>2</sub> <sup>16</sup> O vs. H <sub>2</sub> <sup>18</sup> O containing borate buffer.                                  | S27 |
| <b>Figure S34.</b> GC data of <b>Co<sub>4</sub>O<sub>4</sub>-dpk</b> catalyzed <sup>32</sup> O <sub>2</sub> , <sup>34</sup> O <sub>2</sub> , and <sup>36</sup> O <sub>2</sub> from a H <sub>2</sub> <sup>16</sup> O containing borate buffer. | S27 |
| <b>Figure S35.</b> GC data of <b>Co<sub>4</sub>O<sub>4</sub>-dpk</b> catalyzed <sup>32</sup> O <sub>2</sub> , <sup>34</sup> O <sub>2</sub> , and <sup>36</sup> O <sub>2</sub> from a H <sub>2</sub> <sup>18</sup> O containing borate buffer. | S28 |
| <b>Figure S36.</b> <b>Co<sub>4</sub>O<sub>4</sub>-dpk</b> assisted <sup>32</sup> , <sup>34</sup> , and <sup>36</sup> O <sub>2</sub> evolution from H <sub>2</sub> <sup>18</sup> O containing borate buffer.                                   | S28 |
| <b>Current research survey and Table S8:</b> Mixed Co/Ni-containing water oxidation catalysts.                                                                                                                                                | S29 |
| <b>Figure S37.</b> Syntheses of <b>Co<sub>4</sub>O<sub>4</sub>-dpk</b> , <b>Co<sub>x</sub>Ni<sub>4-x</sub>O<sub>4</sub>-dpk</b> series, and <b>Ni<sub>4</sub>O<sub>4</sub>-dpk</b> .                                                          | S31 |
| <b>Figure S38.</b> Time dependent UV/vis spectra of <b>Co<sub>2.65</sub>Ni<sub>1.35</sub>O<sub>4</sub>-dpk</b> in pH 8.5 borate buffer solution.                                                                                              | S31 |
| <b>Figure S39.</b> Time dependent UV/vis spectra of <b>Co<sub>2.05</sub>Ni<sub>1.95</sub>O<sub>4</sub>-dpk</b> in pH 8.5 borate buffer solution.                                                                                              | S32 |
| <b>Figure S40.</b> Time dependent UV/vis spectra of <b>Co<sub>1.15</sub>Ni<sub>2.85</sub>O<sub>4</sub>-dpk</b> in pH 8.5 borate buffer solution.                                                                                              | S32 |
| <b>Figure S41.</b> Time dependent UV/vis spectra of <b>Ni<sub>4</sub>O<sub>4</sub>-dpk</b> cubane in pH 8.5 borate buffer solution.                                                                                                           | S33 |
| <b>Figure S42.</b> Compared HR-ESI-MS spectra of <b>Co<sub>4</sub>O<sub>4</sub>-dpk</b> , <b>Ni<sub>4</sub>O<sub>4</sub>-dpk</b> , and <b>Co<sub>1.15</sub>Ni<sub>2.85</sub>O<sub>4</sub>-dpk</b> .                                           | S33 |
| <b>Figure S43.</b> Calculated MS spectrum of <b>Co<sub>1.15</sub>Ni<sub>2.85</sub>O<sub>4</sub>-dpk</b> in the <i>m/z</i> range of 577.0-584.5.                                                                                               | S34 |
| <b>Table S9.</b> Photocatalytic water oxidation performance of <b>Co<sub>4</sub>O<sub>4</sub>-dpk</b> and the <b>Co<sub>x</sub>Ni<sub>4-x</sub>O<sub>4</sub>-dpk</b> series.                                                                  | S34 |
| <b>Figure S44.</b> Photocatalytic water oxidation performance of <b>Co<sub>4</sub>O<sub>4</sub>-dpk</b> and the <b>Co<sub>x</sub>Ni<sub>4-x</sub>O<sub>4</sub>-dpk</b> series.                                                                | S34 |
| <b>Figure S45.</b> Mass spectra of <b>Co<sub>2.65</sub>Ni<sub>1.35</sub>O<sub>4</sub>-dpk</b> catalyzed O <sub>2</sub> evolution with H <sub>2</sub> <sup>16</sup> O vs. H <sub>2</sub> <sup>18</sup> O-borate buffer.                        | S35 |
| <b>Figure S46.</b> GC data of <b>Co<sub>2.65</sub>Ni<sub>1.35</sub>O<sub>4</sub>-dpk</b> catalyzed <sup>32</sup> , <sup>34</sup> and <sup>36</sup> O <sub>2</sub> evolution from a H <sub>2</sub> <sup>16</sup> O-borate buffer.              | S35 |
| <b>Figure S47.</b> GC data of <b>Co<sub>2.65</sub>Ni<sub>1.35</sub>O<sub>4</sub>-dpk</b> catalyzed <sup>32</sup> , <sup>34</sup> and <sup>36</sup> O <sub>2</sub> evolution from a H <sub>2</sub> <sup>18</sup> O-borate buffer.              | S36 |
| <b>Figure S48.</b> Representative <b>Co<sub>2.65</sub>Ni<sub>1.35</sub>O<sub>4</sub>-dpk</b> assisted <sup>32</sup> , <sup>34</sup> and <sup>36</sup> O <sub>2</sub> evolution in H <sub>2</sub> <sup>18</sup> O-borate buffer.               | S36 |
| <b>Figure S49.</b> pH dependent UV/vis spectra of <b>Ni<sub>4</sub>O<sub>4</sub>-dpk</b> with plot of the absorbance at 389 nm.                                                                                                               | S37 |
| <b>Computational Settings.</b>                                                                                                                                                                                                                | S38 |
| <b>Table S10.</b> Description of oxygen-oxygen radial distribution function.                                                                                                                                                                  | S38 |
| <b>Figure S50.</b> Radial distribution function of water molecules in the simulation box of the neutral cubane.                                                                                                                               | S39 |
| <b>Table S11.</b> Structure optimizations of <b>Co<sub>4</sub>O<sub>4</sub>-dpk</b> .                                                                                                                                                         | S39 |
| <b>Figure S51.</b> Evolution of volume enclosed by the cubane cage of <b>Co<sub>4</sub>O<sub>4</sub>-dpk</b> during the DFT-MD run.                                                                                                           | S40 |
| <b>Figure S52.</b> Clark electrode kinetics of water oxidation catalyzed by <b>Co<sub>4</sub>O<sub>4</sub>-dpk</b> and <b>mono-Co-dpk</b> .                                                                                                   | S41 |
| <b>Figure S53.</b> TOF per Co center for the reactions of <b>Figure S52</b> .                                                                                                                                                                 | S41 |
| <b>Figure S54.</b> Tentative evaluation of <b>mono-Co-dpk</b> and <b>Co<sub>4</sub>O<sub>4</sub>-dpk</b> for first order kinetics.                                                                                                            | S42 |

## **Analytical characterizations.**

Thermogravimetric (TG) analyses were performed on a Netzsch STA Jupiter 449 F3 TGA in the temperature range 298 to 1173 K with a heating rate of 10 K min<sup>-1</sup> in N<sub>2</sub> atmosphere in an Al<sub>2</sub>O<sub>3</sub> crucible.

Powder X-ray diffraction (PXRD) patterns were recorded on a STOE STADI P diffractometer (transmission mode, Ge monochromator) with Mo K<sub>α</sub> radiation.

Attenuated total reflectance Fourier-transform infrared (ATR-FT-IR) spectra were recorded on a Bruker Vertex 70 spectrometer equipped with a Platinum ATR accessory containing a diamond crystal.

Operando FT-IR spectra were recorded on a ReactIR iC 10 FT-IR spectrometer (METTLER TOLEDO) equipped with a Silver Halide (AgX) DSub AgX FiberConduit probe (METTLER TOLEDO).

UV/vis spectra were recorded on a Lambda 650 S Perkin Elmer UV/visible spectrometer in the range of 300-800 nm using a Quartz SUPRASIL precision cell (10 mm).

Dynamic light scattering (DLS) measurements were carried out with a Zetasizer Nano 3600 instrument (Malvern Instruments Ltd.).

High-resolution electrospray mass spectra (HR-ESI-MS) were recorded on a Bruker maXis QTOFMS instrument (Bruker Daltonics GmbH, Bremen, Germany). The samples were dissolved in MeOH and analyzed via continuous flow injection at 3 μL/min. The mass spectrometer was calibrated between m/z 50 and 3000 using a Fluka electrospray calibration solution (Sigma-Aldrich, Buchs, Switzerland) at a resolution of 20'000 and a mass accuracy below 2 ppm.

NMR measurements were performed on a BRUKER AV3-500 spectrometer (500.25 MHz <sup>1</sup>H frequency), and the longitudinal relaxation times (T<sub>1</sub>) were determined with the inversion recovery method.

## Experimental section.

### Materials

All chemicals and solvents were purchased from commercial suppliers: [Ru(bpy)<sub>3</sub>]Cl<sub>2</sub>·6H<sub>2</sub>O (Sigma-Aldrich, 99.95%), Na<sub>2</sub>S<sub>2</sub>O<sub>8</sub> (Sigma-Aldrich, ≥99.0%), Co(OAc)<sub>2</sub>·4H<sub>2</sub>O (Sigma-Aldrich, ≥99.0%), Ni(OAc)<sub>2</sub>·4H<sub>2</sub>O (Sigma-Aldrich, ≥99.0%), NaClO<sub>4</sub> (Sigma-Aldrich, ≥98.0%), di(2-pyridyl) ketone (Sigma-Aldrich, 99%), Co(ClO<sub>4</sub>)<sub>2</sub>·6H<sub>2</sub>O (Sigma-Aldrich, ≥99.0%), Chelex® 100 sodium form (Sigma-Aldrich, 50-100 mesh), NaOAc-d<sub>3</sub> (Sigma-Aldrich, 99 at% D), D<sub>3</sub>CCOOD (Sigma-Aldrich, 99.5 at% D), D<sub>2</sub>O (Sigma-Aldrich, 99.9 at% D), H<sub>2</sub><sup>18</sup>O (Sigma-Aldrich, 97 at% <sup>18</sup>O), CD<sub>3</sub>CN (Sigma-Aldrich, 99.8 at% D), formamide (Fluka, ≥99.0%).

Ultrapure water was produced from a Barnstead GenPure Pro Water Purification System with an electric conductivity of 0.055 μS/cm (Thermo Scientific).

### Synthesis of [Co<sub>4</sub>(dpy{OH}O)<sub>4</sub>(OAc)<sub>2</sub>(H<sub>2</sub>O)<sub>2</sub>](ClO<sub>4</sub>)<sub>2</sub> (Co<sub>4</sub>O<sub>4</sub>-dpk)

**Co<sub>4</sub>O<sub>4</sub>-dpk** was obtained from a modified and optimized literature protocol by Perlepes *et al.* for **Ni<sub>4</sub>O<sub>4</sub>-dpk**.<sup>1</sup> 0.2 g Co(OAc)<sub>2</sub>·4H<sub>2</sub>O (0.8 mmol) and 0.147 g NaClO<sub>4</sub> (1.2 mmol) were both dissolved in 3 mL H<sub>2</sub>O. 3 mL aqueous solution of 0.0736 g dpk (0.4 mmol) was added to the above solution dropwise under stirring. The solution was filtered to keep the filtrate for crystallization at room temperature. Violet crystals of **Co<sub>4</sub>O<sub>4</sub>-dpk** were obtained over night.

The above procedure was slightly modified for the synthesis of **Co<sub>4</sub>O<sub>4</sub>-dpk** in borate buffer solution. Instead of water, a pH 8.5 borate buffer (0.5 M) was used for mixing the starting materials (0.1 g Co(OAc)<sub>2</sub>·4H<sub>2</sub>O (0.4 mmol), 0.27 g NaClO<sub>4</sub> (2.2 mmol), and 0.0736 g dpk (0.4 mmol)).

### Synthesis of [Co<sub>4</sub>(dpy{OH}O)<sub>4</sub>(OAc-d<sub>3</sub>)<sub>2</sub>(H<sub>2</sub>O)<sub>2</sub>](ClO<sub>4</sub>)<sub>2</sub> (Co<sub>4</sub>O<sub>4</sub>-dpk(OAc-d<sub>3</sub>))

**Co<sub>4</sub>O<sub>4</sub>-dpk(OAc-d<sub>3</sub>)** was obtained from a modification of the above synthetic procedure for **Co<sub>4</sub>O<sub>4</sub>-dpk** by starting from 0.293 g (0.8 mmol) Co(ClO<sub>4</sub>)<sub>2</sub>·4H<sub>2</sub>O and 0.132 g NaOAc-d<sub>3</sub> (1.6 mmol).

### Synthesis of [Co<sub>x</sub>Ni<sub>4-x</sub>(dpy{OH}O)<sub>4</sub>(OAc)<sub>2</sub>(H<sub>2</sub>O)<sub>2</sub>](ClO<sub>4</sub>)<sub>2</sub> (Co<sub>x</sub>Ni<sub>4-x</sub>O<sub>4</sub>-dpk)

The entire series of heterometallic Co-Ni mixed cubanes was obtained from the synthetic procedure of **Co<sub>4</sub>O<sub>4</sub>-dpk** by applying mixtures of Co(OAc)<sub>2</sub>·4H<sub>2</sub>O and Ni(OAc)<sub>2</sub>·4H<sub>2</sub>O with the following ratios: **Co<sub>2.80</sub>Ni<sub>1.20</sub>O<sub>4</sub>-dpk**, 0.64 mmol Co(OAc)<sub>2</sub>·4H<sub>2</sub>O + 0.16 mmol Ni(OAc)<sub>2</sub>·4H<sub>2</sub>O; **Co<sub>2.65</sub>Ni<sub>1.35</sub>O<sub>4</sub>-dpk**, 0.6 mmol Co(OAc)<sub>2</sub>·4H<sub>2</sub>O + 0.2 mmol Ni(OAc)<sub>2</sub>·4H<sub>2</sub>O; **Co<sub>2.05</sub>Ni<sub>1.95</sub>O<sub>4</sub>-dpk**, 0.4 mmol Co(OAc)<sub>2</sub>·4H<sub>2</sub>O + 0.4 mmol Ni(OAc)<sub>2</sub>·4H<sub>2</sub>O; **Co<sub>1.15</sub>Ni<sub>2.85</sub>O<sub>4</sub>-dpk**, 0.2 mmol Co(OAc)<sub>2</sub>·4H<sub>2</sub>O + 0.6 mmol Ni(OAc)<sub>2</sub>·4H<sub>2</sub>O. Crystals were obtained within 4 to 7 d, depending on the increasing Ni contents.

### Synthesis of [Ni<sub>4</sub>(dpy{OH}O)<sub>4</sub>(OAc)<sub>2</sub>(H<sub>2</sub>O)<sub>2</sub>](ClO<sub>4</sub>)<sub>2</sub> (Ni<sub>4</sub>O<sub>4</sub>-dpk)

The synthesis of **Ni<sub>4</sub>O<sub>4</sub>-dpk** is similar to the above literature protocol,<sup>1</sup> starting from 0.2 g Ni(OAc)<sub>2</sub>·4H<sub>2</sub>O (0.8 mmol) and a larger amount of NaClO<sub>4</sub> (0.245 g, 2.0 mmol). Green crystals were obtained within 7 d.

### Synthesis of [Co<sup>III</sup>(dpy{OH}O)<sub>2</sub>]ClO<sub>4</sub> (mono-Co-dpk).

[Co<sup>III</sup>(dpy{OH}O)<sub>2</sub>]ClO<sub>4</sub> was synthesized according the reported procedure by using Co(ClO<sub>4</sub>)<sub>2</sub>·6H<sub>2</sub>O instead of CoCl<sub>2</sub>·6H<sub>2</sub>O.<sup>2</sup>

### Synthesis of [Ru(bpy)<sub>3</sub>](ClO<sub>4</sub>)<sub>3</sub>

PbO<sub>2</sub> was added to 10 mL of 0.5 mM H<sub>2</sub>SO<sub>4</sub> containing 0.3 g [Ru(bpy)<sub>3</sub>]Cl<sub>2</sub> until the liquid phase turned to green. The reaction was completed in an ice bath under stirring for 10 min. A dark green solution was obtained by filtering off PbO<sub>2</sub>. 2 M HClO<sub>4</sub> was dropwise added into above green solution until the formation of a green precipitate set in, and [Ru(bpy)<sub>3</sub>](ClO<sub>4</sub>)<sub>3</sub> was obtained from filtering as a green solid.

---

(1) Efthymiou, C. G.; Raptopoulou, C. P.; Terzis, A.; Boča, R.; Korabic, M.; Mrozinski, J.; Perlepes, S. P.; Bakalbassis, E. G. *Eur. J. Inorg. Chem.* **2006**, 2006, 2236–2252.

(2) Zhao, Y.; Lin, J.; Liu, Y.; Ma, B.; Ding, Y.; Chen, M. *Chem. Commun.* **2015**, 51, 17309–17312.

Non-metal elemental analysis of **Co<sub>4</sub>O<sub>4</sub>-dpk** (C<sub>48</sub>H<sub>46</sub>Cl<sub>2</sub>Co<sub>4</sub>N<sub>8</sub>O<sub>22</sub>): calc. (%) C, 41.36; H, 3.30; N, 8.04; Cl, 5.10; found (%) C, 40.90; H, 3.33; N, 7.87; Cl, 5.19. (Co = 58.93)

Non-metal elemental analysis of **Co<sub>2.80</sub>Ni<sub>1.20</sub>O<sub>4</sub>-dpk** (C<sub>48</sub>H<sub>46</sub>Cl<sub>2</sub>Co<sub>x</sub>Ni<sub>4-x</sub>N<sub>8</sub>O<sub>22</sub>): calc. (%) C, 41.35; H, 3.30; N, 8.04; Cl, 5.10; found (%) C, 40.94; H, 3.35; N, 7.95; Cl, 5.01. (Co = Ni = 59)

Non-metal elemental analysis of **Co<sub>2.65</sub>Ni<sub>1.35</sub>O<sub>4</sub>-dpk** (C<sub>48</sub>H<sub>46</sub>Cl<sub>2</sub>Co<sub>x2</sub>Ni<sub>4-x2</sub>N<sub>8</sub>O<sub>22</sub>): calc. (%) C, 41.35; H, 3.30; N, 8.04; Cl, 5.10; found (%) C, 40.87; H, 3.37; N, 8.17; Cl, 5.22. (Co = Ni = 59)

Non-metal elemental analysis of **Co<sub>2.05</sub>Ni<sub>1.95</sub>O<sub>4</sub>-dpk** (C<sub>48</sub>H<sub>46</sub>Cl<sub>2</sub>Co<sub>x3</sub>Ni<sub>4-x3</sub>N<sub>8</sub>O<sub>22</sub>): calc. (%) C, 41.35; H, 3.30; N, 8.04; Cl, 5.10; found (%) C, 40.92; H, 3.34; N, 7.90; Cl, 5.17. (Co = Ni = 59)

Non-metal elemental analysis of **Co<sub>1.15</sub>Ni<sub>2.85</sub>O<sub>4</sub>-dpk** (C<sub>48</sub>H<sub>46</sub>Cl<sub>2</sub>Co<sub>x4</sub>Ni<sub>4-x4</sub>N<sub>8</sub>O<sub>22</sub>): calc. (%) C, 41.35; H, 3.30; N, 8.04; Cl, 5.10; found (%) C, 40.95; H, 3.37; N, 7.92; Cl, 5.25. (Co = Ni = 59)

Non-metal elemental analysis of **Ni<sub>4</sub>O<sub>4</sub>-dpk** (C<sub>48</sub>H<sub>46</sub>Cl<sub>2</sub>Ni<sub>4</sub>N<sub>8</sub>O<sub>22</sub>): calc. (%) C, 41.39; H, 3.30; N, 8.05; Cl, 5.10; found (%) C, 41.02, H, 3.39; N, 8.22; Cl, 4.98. (Ni = 58.69)

ICP-MS elemental analysis of **Co<sub>4</sub>O<sub>4</sub>-dpk** (C<sub>48</sub>H<sub>46</sub>Cl<sub>2</sub>Co<sub>4</sub>N<sub>8</sub>O<sub>22</sub>): calc. (%) Co, 16.9; found (%) Co, 16.9.

ICP-MS elemental analysis of **Co<sub>2.80</sub>Ni<sub>1.20</sub>O<sub>4</sub>-dpk** (C<sub>48</sub>H<sub>46</sub>Cl<sub>2</sub>Co<sub>x</sub>Ni<sub>4-x</sub>N<sub>8</sub>O<sub>22</sub>): calc. (%) Co + Ni, 16.9; found (%) Co, 11.7; Ni, 5.04.

ICP-MS elemental analysis of **Co<sub>2.65</sub>Ni<sub>1.35</sub>O<sub>4</sub>-dpk** (C<sub>48</sub>H<sub>46</sub>Cl<sub>2</sub>Co<sub>x</sub>Ni<sub>4-x</sub>N<sub>8</sub>O<sub>22</sub>): calc. (%) Co + Ni, 16.9; found (%) Co, 11.1; Ni, 5.65.

ICP-MS elemental analysis of **Co<sub>2.05</sub>Ni<sub>1.95</sub>O<sub>4</sub>-dpk** (C<sub>48</sub>H<sub>46</sub>Cl<sub>2</sub>Co<sub>x</sub>Ni<sub>4-x</sub>N<sub>8</sub>O<sub>22</sub>): calc. (%) Co + Ni, 16.9; found (%) Co, 8.16; Ni, 8.58.

ICP-MS elemental analysis of **Co<sub>1.15</sub>Ni<sub>2.85</sub>O<sub>4</sub>-dpk** (C<sub>48</sub>H<sub>46</sub>Cl<sub>2</sub>Co<sub>x</sub>Ni<sub>4-x</sub>N<sub>8</sub>O<sub>22</sub>): calc. (%) Co + Ni, 16.9; found (%) Co, 4.78; Ni, 11.9.

ICP-MS elemental analysis of **Ni<sub>4</sub>O<sub>4</sub>-dpk** (C<sub>48</sub>H<sub>46</sub>Cl<sub>2</sub>Ni<sub>4</sub>N<sub>8</sub>O<sub>22</sub>): calc. (%) Ni, 16.9; found (%) Ni, 16.6.

### Photocatalytic water oxidation

The deaerated reaction solutions were prepared in a 10 mL glass vial as follows: 9.5 mg Na<sub>2</sub>S<sub>2</sub>O<sub>8</sub> (5 mM) was added to 8 mL of a buffered solution (pH 7.0 phosphate buffer (80 mM), pH 8.0 borate buffer (80 mM), pH 8.5 borate buffer (40-120 mM), and pH 9.0 borate buffer (80 mM)) containing completely dissolved 6 mg [Ru(bpy)<sub>3</sub>]Cl<sub>2</sub>·6H<sub>2</sub>O (1 mM) and catalyst (desired concentration). Glass vials with the above solutions were sealed with a combination of a rubber septum (PTFE) and an aluminum crimp cap, followed by deaeration through purging with helium (purity 6.0) for 12 min.

O<sub>2</sub> evolution of the above catalytic solutions was measured independently by Clark electrode techniques and gas chromatography. For Clark electrode measurements, an Oxygen sensor (OX-N) Clark electrode (Unisense) was inserted into the deaerated solution through the rubber septum, followed by irradiation with a 470 nm high flux LED light (26.1 mW/cm<sup>2</sup>, Rhopoint Components LTD) after a constant signal of the Clark electrode was obtained under a stirring rate of 1000 rpm. O<sub>2</sub> evolution was monitored with the SensorTrace software (Unisense) applying a frequency of 1 data point per sec. The calibration of the Clark electrode was done according to the procedure provided by the Unisense user manual with a sodium ascorbate solution (2 g sodium ascorbate in 100 mL 0.1 M NaOH solution) as the zero calibration solution and aerated water as the aerated calibration solution (for details cf. Unisense user manual).

For GC measurements, the deaerated solution was irradiated with the above LED light source for 30 min under a stirring rate of 1000 rpm, and a 200 µL gas sample was taken with a gas-tight micro-liter syringe (Hamilton-1825RN) and transferred to the GC injection port. After pushing the syringe bar to the 100 µL mark, 100 µL of the gas sample was quickly injected into the GC (Agilent Technologies 7820A) equipped with a thermal conductivity detector (Varian). O<sub>2</sub> and N<sub>2</sub> were separated by passing the sample through a 3 m \* 2 mm packed 5 Å molecular sieve 13X 80-100 column with a helium carrier gas (purity 6.0). Quantification of O<sub>2</sub> evolution was carried out with a good linear GC calibration curve obtained from measuring a series of volumes (50-500 µL) of pure O<sub>2</sub> vs. the peak area of each O<sub>2</sub> signal. Contamination of air was corrected by subtracting the half peak area of N<sub>2</sub> from the peak area of O<sub>2</sub> (due to the similar GC response to O<sub>2</sub> and N<sub>2</sub>, the peak area of the contaminating O<sub>2</sub> basically equals 1/3 of the N<sub>2</sub> peak area). The pH value of the post-catalytic solution was measured with a METTLER TOLEDO SevenCompact pH meter.

### Recycling tests

Standard activity tests were completed according to the above procedure for photocatalytic water oxidation, and the pH value was readjusted to 8.5 by adding solid Na<sub>2</sub>B<sub>4</sub>O<sub>7</sub>·10H<sub>2</sub>O. After adding 9.5 mg of Na<sub>2</sub>S<sub>2</sub>O<sub>8</sub>, the first activity recycling test was started applying the standard procedure. The above procedure was also repeated for the third activity recycling run. O<sub>2</sub> evolution during each test was monitored with a Clark electrode.

### **<sup>18</sup>O isotope-labeling experiments**

<sup>18</sup>O labeled-photocatalytic water oxidation reactions were carried out according to the above standard procedure using <sup>18</sup>O-enriched water (<sup>18</sup>O atom% = 10.8% and 8.3%) instead of normal water. A 100  $\mu$ L gas sample from the headspace was injected into a Thermo Scientific Focus GC (run with helium as carrier gas and equipped with a PLTT-5A molsieve 5 PLOT column (30 m \* 0.53 mm \* 25  $\mu$ m)) interfaced with a PolarisQ mass spectrometer (electron impact ionization model) for analysis. The MS detector was tuned for maximum sensitivity, and the single ion mode was selected to scan for the ions of  $m/z$  = 28, 32, 34, 36 with a dwell time of 100 ms. The single ion extracted chromatograms were recorded and evaluated for the  $m/z$  = 32/34/36 ratios.

### **pH-dependent UV/vis titration**

300  $\mu$ M **Co<sub>4</sub>O<sub>4</sub>-dpk** aqueous solution (4 mL) was titrated by adding sequential aliquots of 0.5 mM NaOH (aq.), and the pH value together with UV/vis spectrum were recorded for each titration, respectively. A titration curve was constructed corresponding to the maximum absorption vs. pH value at this absorption, and the pK<sub>a</sub> value was determined as the pH value at the midpoint of the titration curve rise.

### **Cyclic voltammetry (CV)**

CV measurements were carried out on a Metrohm PalmSens3 instrument with glassy carbon, Ag/AgCl (sat. KCl, 0.197 V vs. NHE) and Pt Rod electrodes as working, reference, and auxiliary electrodes. The solutions were deaerated by purging with Ar for 10 min before the measurements. After each measurement, the glassy carbon electrode was polished with alumina slurry, and rinsed with water, 0.1 M HCl, CH<sub>3</sub>OH, and CH<sub>2</sub>Cl<sub>2</sub>. Cyclic voltammograms were recorded in different pH media to obtain the corresponding redox waves of the cobalt centers.

### **Acetate ligand exchange study**

Sequential aliquots of D<sub>2</sub>O were added stepwise to a 4.5 mL, 40 mM **Co<sub>4</sub>O<sub>4</sub>-dpk** (251 mg) CD<sub>3</sub>CN solution to obtain 1%, 2%, 4%, 6%, and 8% v/v D<sub>2</sub>O containing mixtures, and the FT-IR spectrum was measured for each step on a ReactIR iC 10 FT-IR spectrometer equipped with a Silver Halide (AgX) DSub AgX FiberConduit probe (METTLER TOLEDO). The FT-IR spectrum of HAc-d<sub>4</sub> was recorded from its CD<sub>3</sub>CN solution (4.5 mL, 80 mM). The background was obtained from 4.5 mL pure CD<sub>3</sub>CN and subtracted from the **Co<sub>4</sub>O<sub>4</sub>-dpk** and HAc-d<sub>4</sub> measurements.

### **Buffer ligation study of the {Co<sub>2</sub>O<sub>2</sub>(OH<sub>2</sub>)<sub>2</sub>} edge site**

For ligation studies in borate buffer, FT-IR spectra of a 6 mL, 40 mM **Co<sub>4</sub>O<sub>4</sub>-dpk** (251 mg) CH<sub>3</sub>CN solution were recorded before and after adding 1 mL of 240 mM borate buffer aqueous solution, respectively. The backgrounds were obtained from 6 mL pure CH<sub>3</sub>CN and 6 mL CH<sub>3</sub>CN + 1 mL borate buffer aqueous solution (240 mM), respectively, and subtracted from the **Co<sub>4</sub>O<sub>4</sub>-dpk** measurements. The same procedure was applied for the phosphate buffer study by using formamide and Na<sub>2</sub>HPO<sub>4</sub> instead of CH<sub>3</sub>CN and borate buffer.

### **X-ray absorption spectroscopy**

Experiments have been performed at the SuperXAS beamline of the Swiss Light Source (SLS), Villigen, Switzerland. The storage ring was run in the top-up mode with an average current of 400 mA. The X-ray beam was collimated by a Si coated mirror and the energy was scanned by a channel-cut Si(111) monochromator. Energy calibration was performed using metal Co foil (with the maximum of the first derivative of the spectrum at 7709 eV). A toroidal mirror with Rh coating was employed after the monochromator to focus the incident X-rays with a spot size of 140×120  $\mu$ m<sup>2</sup> on the sample. The photon flux at the sample was measured to be 3.3×10<sup>11</sup> photons/s. Measurements were performed in the fluorescence mode using 5-element Silicon Drift Detector (SDD). Z-1 filter (Fe foil) with absorption edge jump 4.5 was placed at 9 mm distance from the detector and an additional collimator was placed between filter and sensors of the detector to reduce the re-fluorescence from the filter that reaches the detector and to minimize the background from the elastic scattering of the incident beam. For in-situ experiments the sample was circulated in the flow system with the X-ray beam interacting with the open cylindrical jet of the sample (1 mm diameter). The total volume of sample in the flow system was ~50 mL. The use of the flow system with rather large volume allowed to avoid any observable X-ray-induced damage of the sample, which was confirmed by a large series of short scans (a few minutes each) for initial state of the catalyst. Sample container was irradiated with high-power collimated LED source (Mightex, model LCS-0405-12-48) with 405 nm wavelength, 48 mm aperture, and the output power up to 975 mW.

**In situ photochemistry:** The sample (100  $\mu$ M **Co<sub>4</sub>O<sub>4</sub>-dpk**, 1 mM PS, 5 mM Na<sub>2</sub>S<sub>2</sub>O<sub>8</sub>, in 50 mL borate buffer pH 8.5) was cycled in the open jet in order to prevent the accumulation of radiation damage.

**Freeze quench experiments:** XAFS data were recorded at 40 K using the He-cryostat. The samples were prepared as follows: 1 mL of 0.5 mM **Co<sub>4</sub>O<sub>4</sub>-dpk** (in pH 8.5, 80 mM borate buffer) was mixed with 1 mL of a [Ru(bpy)<sub>3</sub>](ClO<sub>4</sub>)<sub>3</sub> solution (0.5 – 20 mM, miliQ). After 1 min mixing time, 0.1 mL of the solution were rapidly frozen on the pre-cooled cooper sample holder (~77 K). The sample was transferred quickly into the cryostat.

**Data treatment:** Energy calibration, background removal, Fourier transformation, and linear compination fit of XAS spectra were performed with the Athena software, and EXAFS fits were performed with the Artemis software.<sup>1</sup>

### Chemical oxidation of Co<sub>4</sub>O<sub>4</sub>-dpk

**Clark electrode kinetics:** 4 mL of 0.5 mM **Co<sub>4</sub>O<sub>4</sub>-dpk** solution (pH 8.5, 80 mM borate buffer) was mixed with 4 mL [Ru(bpy)<sub>3</sub>](ClO<sub>4</sub>)<sub>3</sub> solution (2.5 – 19.25 mM, milliQ). Oxygen evolution was recorded with a Clark electrode applying the same settings in the photocatalytic experiments.

**UV/vis kinetics:** 1 mL of 0.5 mM **Co<sub>4</sub>O<sub>4</sub>-dpk** solution (pH 8.5, 80 mM borate buffer) was mixed with 1 mL [Ru(bpy)<sub>3</sub>](ClO<sub>4</sub>)<sub>3</sub> solution (2.5 – 19.25 mM, milliQ). Single wavelength absorption data at the absorption maximum of [Ru(bpy)<sub>3</sub>](ClO<sub>4</sub>)<sub>3</sub> (675 nm) were recorded applying a frequency of 1 data point per sec.

### Crystallographic information and structural description of Co<sub>4</sub>O<sub>4</sub>-dpk

A suitable single crystal was selected, mounted on a glass fiber loop with Infineum oil, and placed in a cooled N<sub>2</sub> gas stream at 183 K. X-ray diffraction intensity data collection was performed on an Oxford Xcalibur Ruby CCD diffractometer equipped with an enhanced Mo X-ray source (Mo K $\alpha$ ,  $\lambda$  = 0.71073 Å) and a graphite monochromator. All data processing and an absorption correction (multi-scan) were carried out using the program CrysAlisPro (1.171.37.35. Agilent (2014)). Structure solution and refinement were performed using the Olex2 1.2 software package.<sup>2</sup> An initial structure solution was obtained from SHELXT (2014/4),<sup>3</sup> and refined with SHELXL (2014/7).<sup>4</sup> Crystal data, data collection parameters, and refinement statistics are listed in **Table S1**. An ORTEP representation of **Co<sub>4</sub>O<sub>4</sub>-dpk** is displayed in **Figure S1**.

The crystal structure of **Co<sub>4</sub>O<sub>4</sub>-dpk** is constituted of the tetranuclear Co-containing cation [Co<sub>4</sub>(dpy{OH}O)<sub>4</sub>(OAc)<sub>2</sub>(H<sub>2</sub>O)<sub>2</sub>]<sup>2+</sup> and two well-separated ClO<sub>4</sub><sup>-</sup> counteranions. ClO<sub>4</sub><sup>-</sup> exhibits disorder with the occupancies of 0.69 and 0.31 for Cl1, O8 and Cl2, O12, respectively, and it is located close to the aqua ligand. A hydrogen bond is formed between O9 of ClO<sub>4</sub><sup>-</sup> and H5a of the neighboring aqua ligand. The [Co<sub>4</sub>(dpy{OH}O)<sub>4</sub>(OAc)<sub>2</sub>(H<sub>2</sub>O)<sub>2</sub>]<sup>2+</sup> cation and two ClO<sub>4</sub><sup>-</sup> anions are located on the same two-fold axis. The four Co atoms of the {Co<sub>4</sub>O<sub>4</sub>} cubic core are connected by 4 O atoms from 4 dpd-H ligands. The Co centers can be classified into two different types, namely Co1/Co1a and Co2/Co2a, in line with the molecular symmetry of **Co<sub>4</sub>O<sub>4</sub>-dpk**. Co1 is coordinated by a single N atom from one of the dpd-H ligands and by 2 O atoms from different dpd-H ligands. Additionally, one H<sub>2</sub>O and one monodentate acetate ligand are also coordinated to Co1 vertically and horizontally to the {Co1OCo1aO} plane, respectively. Co2 is exclusively coordinated by 3 N atoms and 3 O atoms from different (dpy{OH}O) ligands.

---

(1) Ravel, B.; Newville, M. *J. Synchrotron Rad.* **2005**, *12*, 537–541.

(2) Dolomanov, O. V.; Bourhis, L. J.; Gildea, R. J.; Howard, J. A. K.; Puschmann, H. *J. Appl. Cryst.* **2009**, *42*, 339–341.

(3) Sheldrick, G. M. *Acta Cryst.* **2015**, *A71*, 3–8.

(4) Sheldrick, G. M. *Acta Cryst.* **2015**, *C71*, 3–8.

**Table S1.** Crystallographic and structural refinement data of [Co<sub>4</sub>(dpy{OH}O)<sub>4</sub>(OAc)<sub>2</sub>(H<sub>2</sub>O)<sub>2</sub>](ClO<sub>4</sub>)<sub>2</sub>.

|                                        |                                                                                                |
|----------------------------------------|------------------------------------------------------------------------------------------------|
| Empirical formula                      | C <sub>48</sub> H <sub>46</sub> Cl <sub>2</sub> Co <sub>4</sub> N <sub>8</sub> O <sub>22</sub> |
| Formula weight                         | 1393.55 g·mol <sup>-1</sup>                                                                    |
| Temperature                            | 183 K                                                                                          |
| Radiation wavelength                   | 0.71073 Å                                                                                      |
| Crystal system                         | monoclinic                                                                                     |
| Space group                            | C2/c                                                                                           |
| <i>a</i>                               | 22.8068(9) Å                                                                                   |
| <i>b</i>                               | 12.1904(4) Å                                                                                   |
| <i>c</i>                               | 21.0805(7) Å                                                                                   |
| $\alpha$                               | 90°                                                                                            |
| $\beta$                                | 115.750(5)°                                                                                    |
| $\gamma$                               | 90°                                                                                            |
| Volume                                 | 5278.9(4) Å <sup>3</sup>                                                                       |
| <i>Z</i>                               | 4                                                                                              |
| Density calcd.                         | 1.753 g·cm <sup>-3</sup>                                                                       |
| Absorption coefficient                 | 1.428 mm <sup>-1</sup> (analytical)                                                            |
| Crystal size (mm)                      | 0.322 × 0.195 × 0.104                                                                          |
| Independent reflections                | 5396 [R <sub>int</sub> = 0.0449]                                                               |
| Reflections collected                  | 54440                                                                                          |
| $\theta$ range                         | 2.418–26.371°                                                                                  |
| Completeness to $\theta = 26.32^\circ$ | 0.999                                                                                          |
| F(000)                                 | 2832                                                                                           |
| Data/restraints/parameters             | 5396/79/402                                                                                    |
| $R_1[I > 2\sigma(I)]^a$                | 0.0598                                                                                         |
| $wR_2[I > 2\sigma(I)]^b$               | 0.1495                                                                                         |
| $R_1^a$ (all data)                     | 0.0712                                                                                         |
| $wR_2^b$ (all data)                    | 0.1589                                                                                         |
| Goodness-of-fit on F <sup>2</sup>      | 1.050                                                                                          |

$$^a R_1 = \sum ||F_o| - |F_c|| / \sum |F_o|; ^b wR_2 = \{ \sum [w(F_o^2 - F_c^2)^2] / \sum [w(F_o^2)^2] \}^{1/2}$$

**Table S2.** Selected bond lengths and distances of Co<sub>4</sub>O<sub>4</sub>-dpk.

| Bond                 | d (Å)    | Bond                 | d (Å)    |
|----------------------|----------|----------------------|----------|
| Co1-Co1a             | 3.165    | Co2-Co2a             | 3.072    |
| Co1-Co2a<br>Co1a-Co2 | 3.299    | Co1-Co2<br>Co1a-Co2a | 3.207    |
| Co1-O1<br>Co1a-O1a   | 2.067(3) | Co2-O1<br>Co2a-O1a   | 2.151(3) |
| Co1-O1a<br>Co1a-O1   | 2.138(3) | Co2-O3<br>Co2a-O3a   | 2.050(3) |
| Co1-O3a<br>Co1a-O3   | 2.176(3) | Co2-O3a<br>Co2a-O3   | 2.116(3) |
| Co1-O5<br>Co1a-O5a   | 2.105(4) | Co2-N2<br>Co2a-N2a   | 2.071(4) |
| Co1-O6<br>Co1a-O6a   | 2.027(3) | Co2-N3<br>Co2a-N3a   | 2.131(3) |
| Co1-N1<br>Co1a-N1a   | 2.129(4) | Co2-N4a<br>Co2a-N4   | 2.134(4) |



**Table S3.** Bond valence sum (BVS) calculations for the Co centers of **Co<sub>4</sub>O<sub>4</sub>-dpk**.

| Atom     | BVS  | Atom     | BVS  |
|----------|------|----------|------|
| Co1/Co1a | 1.97 | Co2/Co2a | 1.95 |

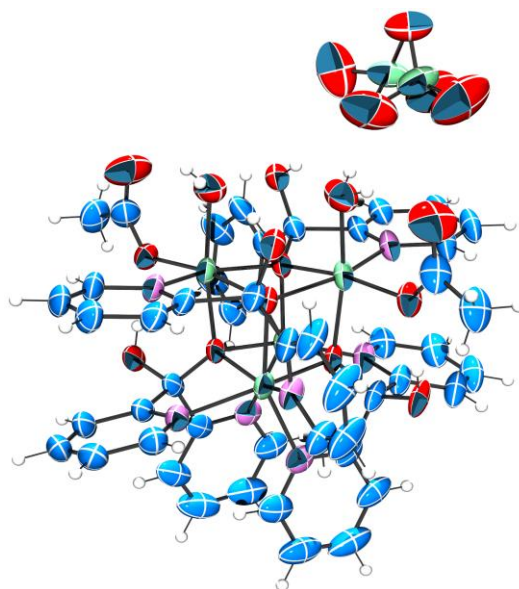

**Figure S1a.** ORTEP representation of **Co<sub>4</sub>O<sub>4</sub>-dpk** (50% probability level).

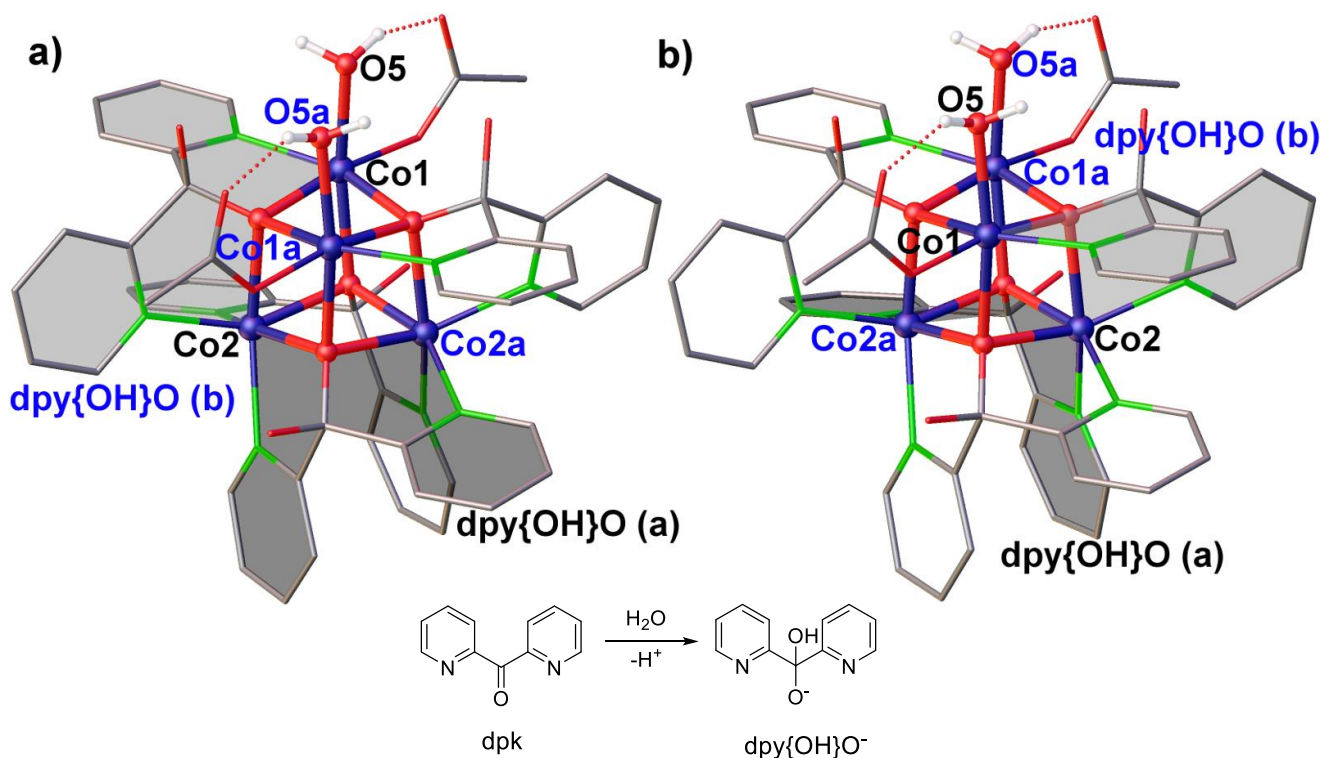

**Figure S1b.** Top: Crystal structure of **Co<sub>4</sub>O<sub>4</sub>-dpk** with the crystallographically different dpy{OH}O ligands highlighted; Co: dark blue, C: grey, O: red, N: green, H: white; **a** and **b** are related through a  $C_2$  operation; bottom: formation of the dpy{OH}O<sup>-</sup> ligand.

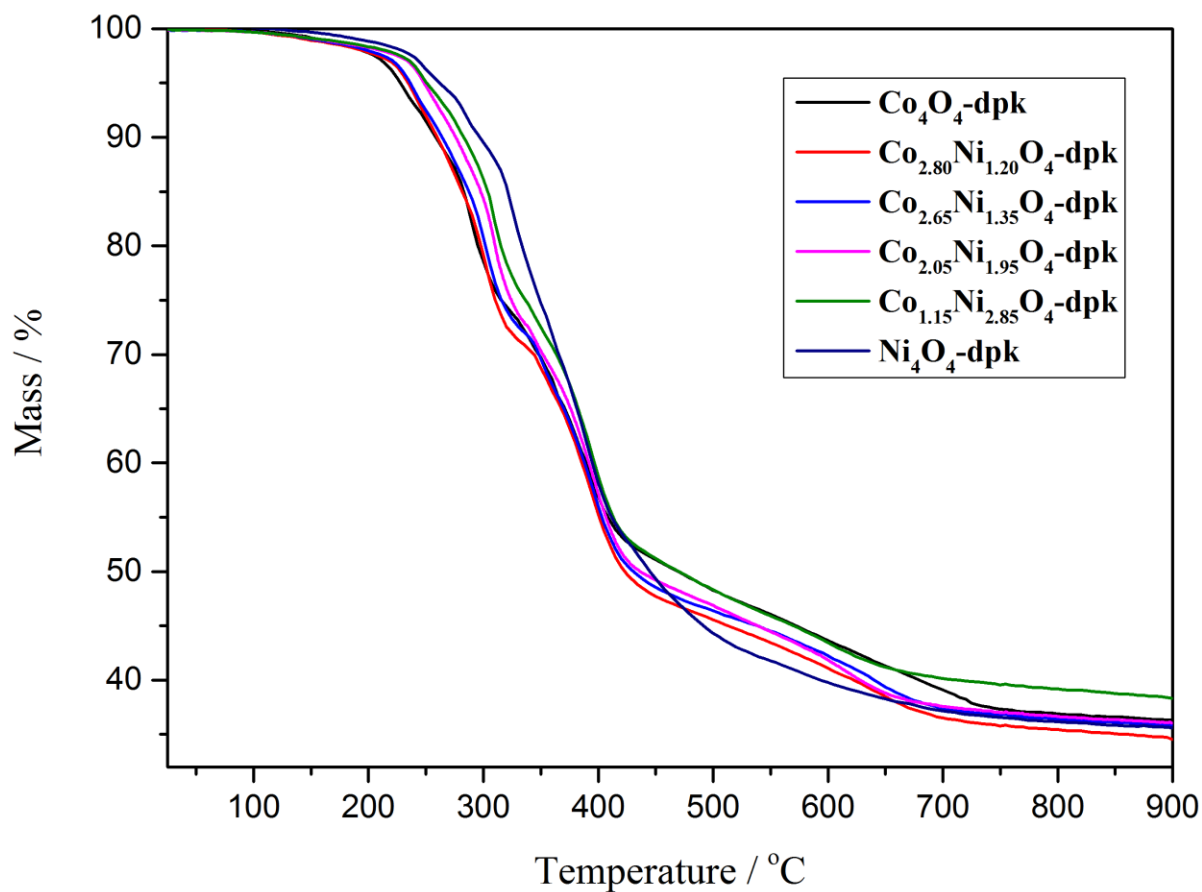

**Figure S2.** Thermogravimetric characterization of  $\text{Co}_4\text{O}_4\text{-dpk}$ , the  $\text{Co}_x\text{Ni}_{4-x}\text{O}_4\text{-dpk}$  series, and  $\text{Ni}_4\text{O}_4\text{-dpk}$ .

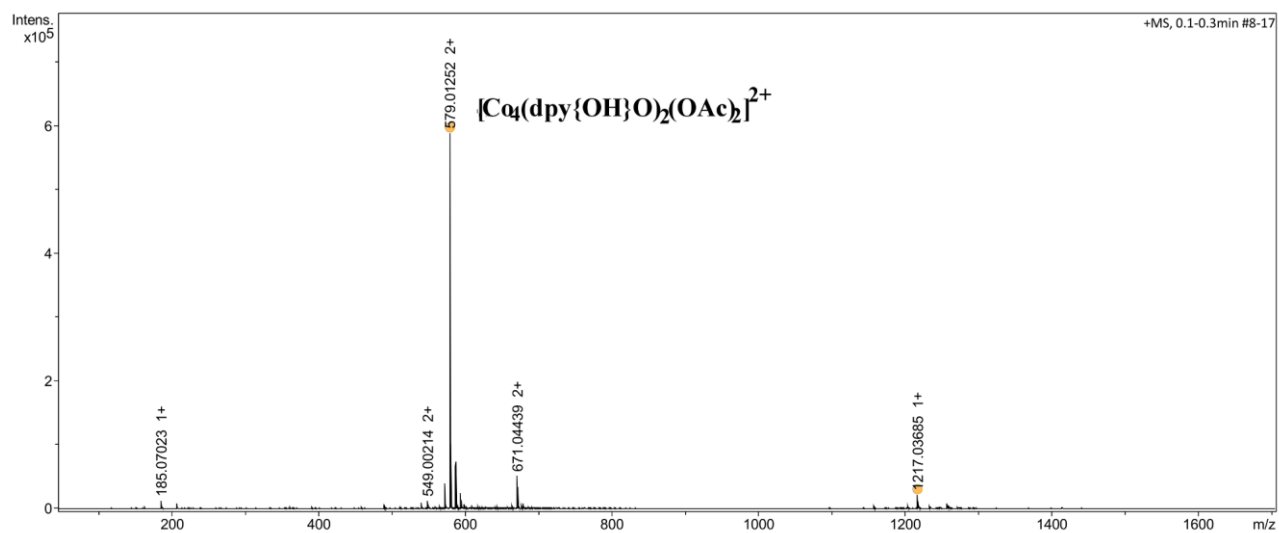

**Figure S3.** HR-ESI-MS spectrum of  $\text{Co}_4\text{O}_4\text{-dpk}$ .

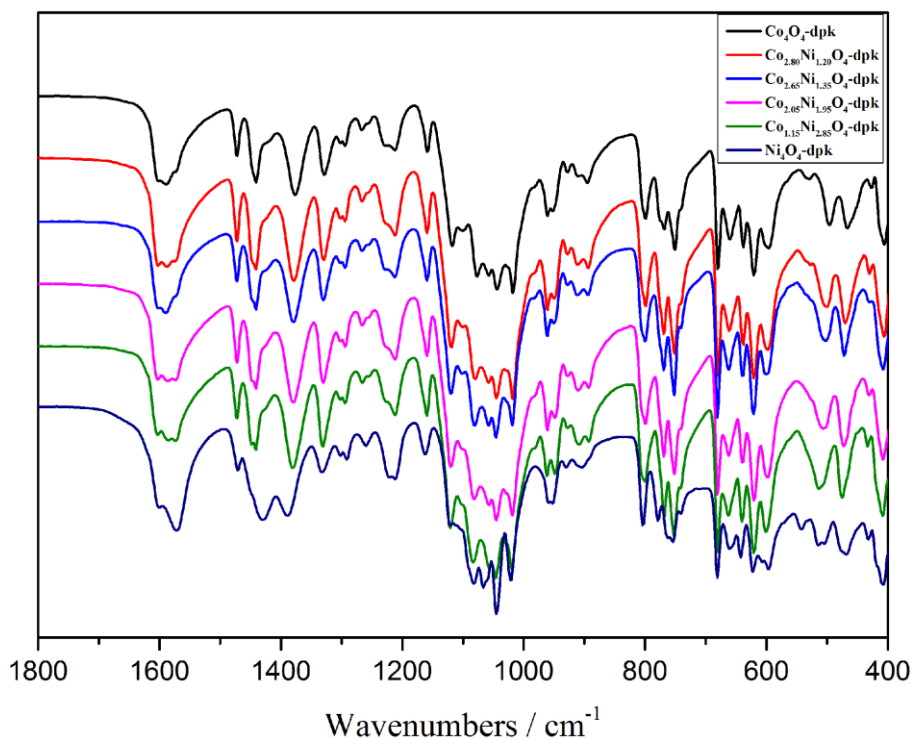

**Figure S4.** FT-IR spectra of **Co<sub>4</sub>O<sub>4</sub>-dpk**, **Ni<sub>4</sub>O<sub>4</sub>-dpk**, and the **Co<sub>x</sub>Ni<sub>4-x</sub>O<sub>4</sub>-dpk** series.

1603 cm<sup>-1</sup> (m): single C-O stretching vibration of the (dpy{OH}O) ligand;  
 1472 (m), 1442 (m), and 1379 (m) cm<sup>-1</sup>: stretching vibrations of the 2-pyridyl rings; 1571 cm<sup>-1</sup> (m, overlapping with 1603 cm<sup>-1</sup>): asymmetrical vibrations of COO<sup>-</sup>; 1329 cm<sup>-1</sup> (m): symmetric vibrations of COO<sup>-</sup>; 620 cm<sup>-1</sup> (s):  $\nu_4(\text{F}_2)$  of the uncoordinated T<sub>d</sub> ClO<sub>4</sub><sup>-</sup>; 682 cm<sup>-1</sup> (s), 801 (m), 770 (s), and 755 (s) cm<sup>-1</sup>: C-H out-of-plane vibrations of the 2-pyridyl rings; C-H in-plane vibrations of the 2-pyridyl rings.

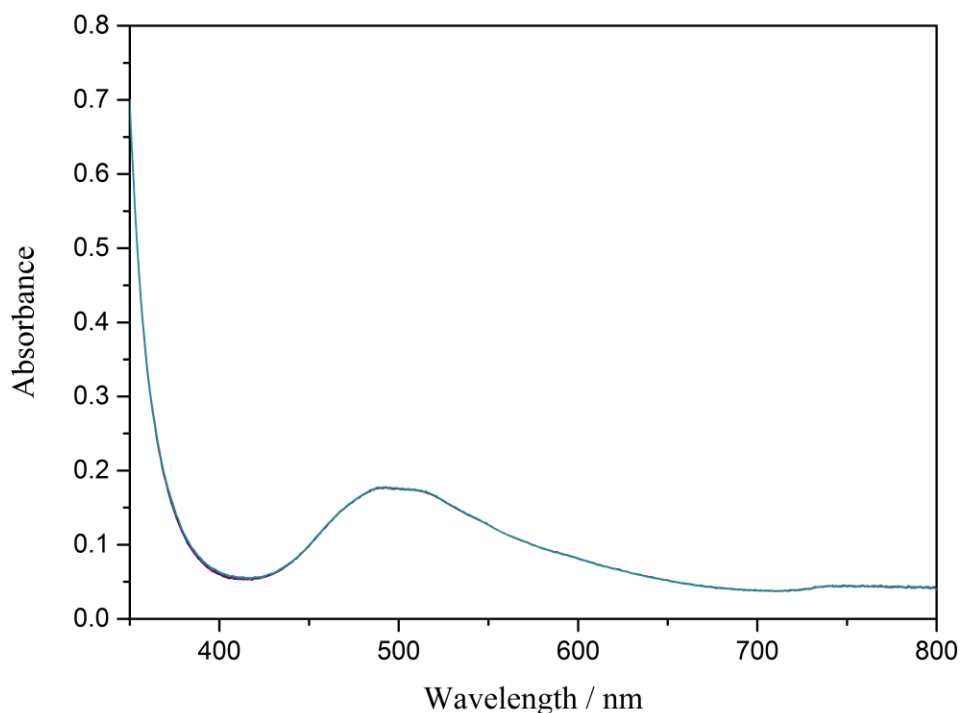

**Figure S5.** Time dependent UV/vis spectra of 1.5 mM **Co<sub>4</sub>O<sub>4</sub>-dpk** in pH 8.5, 80 mM borate buffer solution over 2 h.

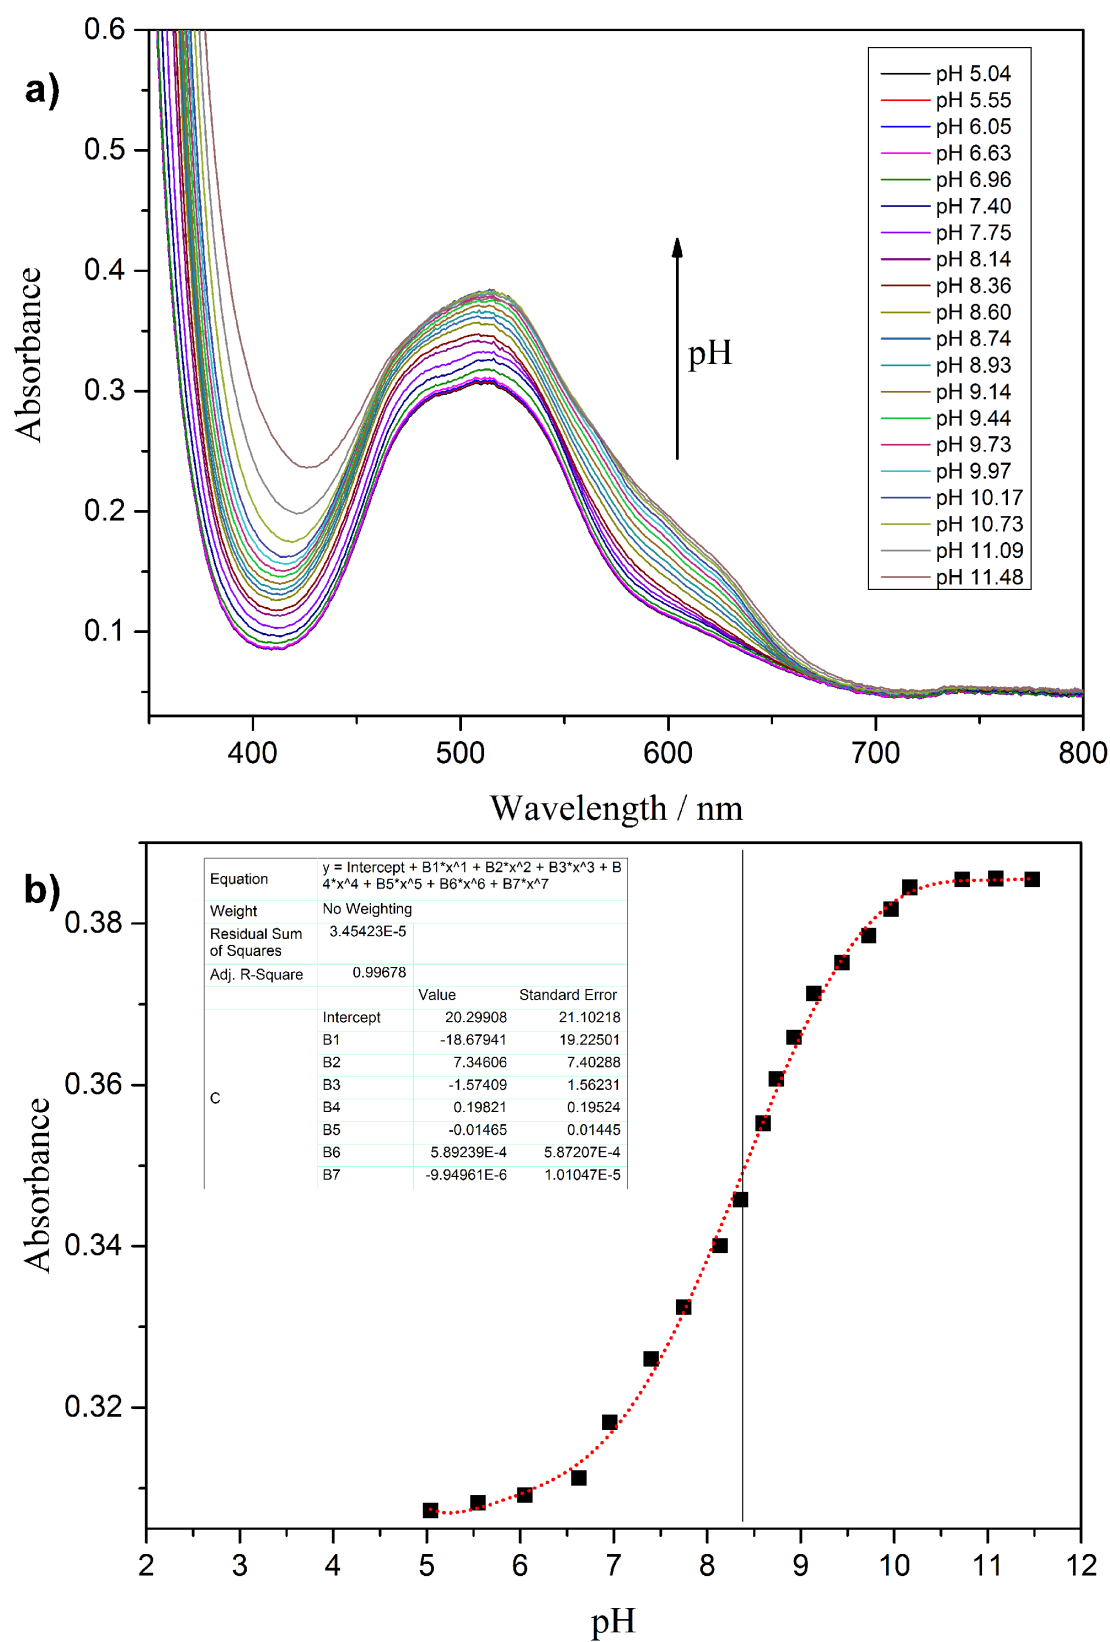

**Figure S6.** (a) pH dependent UV/vis spectra of 3 mM **Co<sub>4</sub>O<sub>4</sub>-dpk** cubane; (b) representative plot of the absorbance at 516 nm vs. pH.

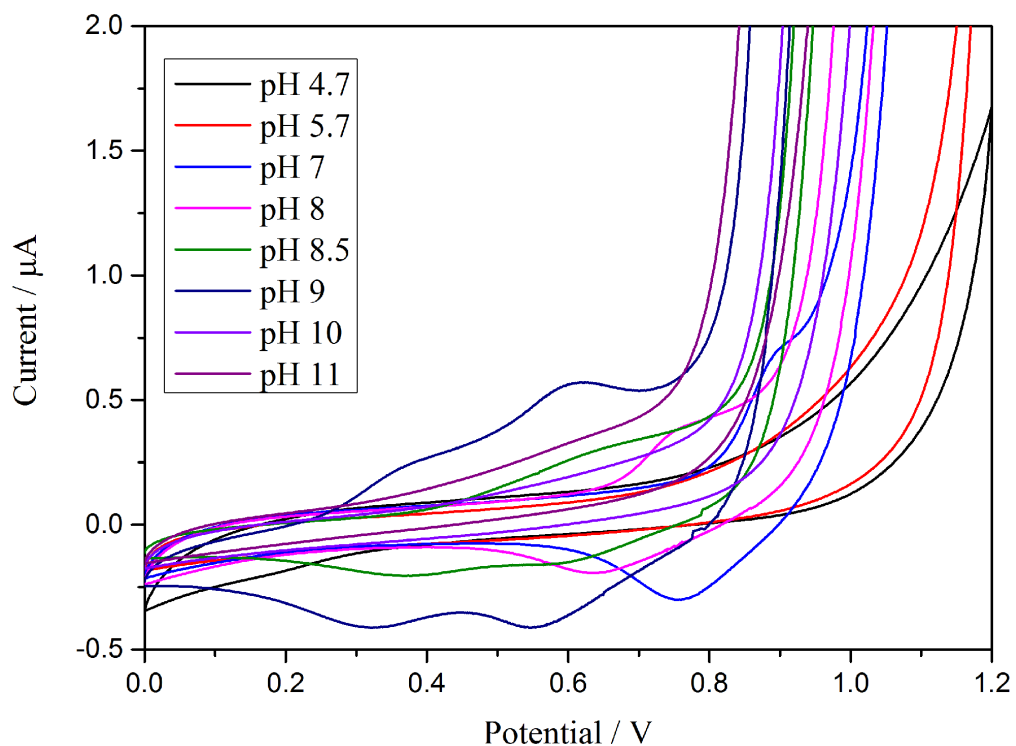

**Figure S7.** Cyclic voltammograms of 1 mM  $\text{Co}_4\text{O}_4\text{-dpk}$  in the pH range of 4.7-11.

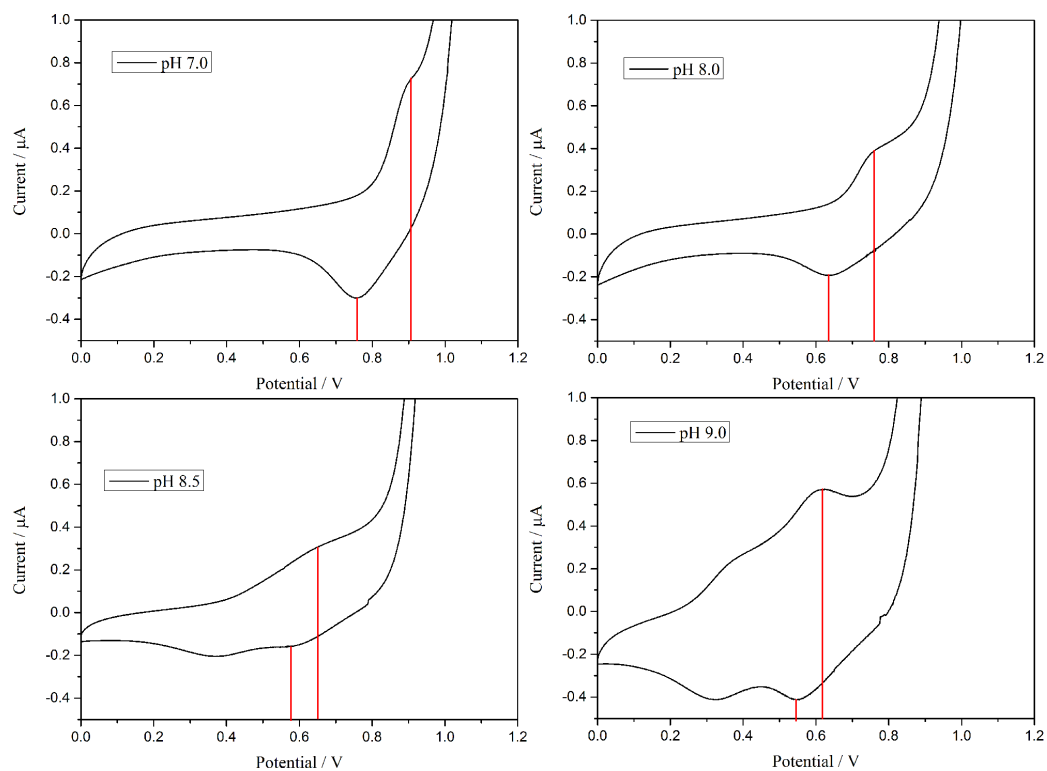

**Figure S8.** Cyclic voltammograms of 1 mM  $\text{Co}_4\text{O}_4\text{-dpk}$  in the pH range of 7.0-9.0.

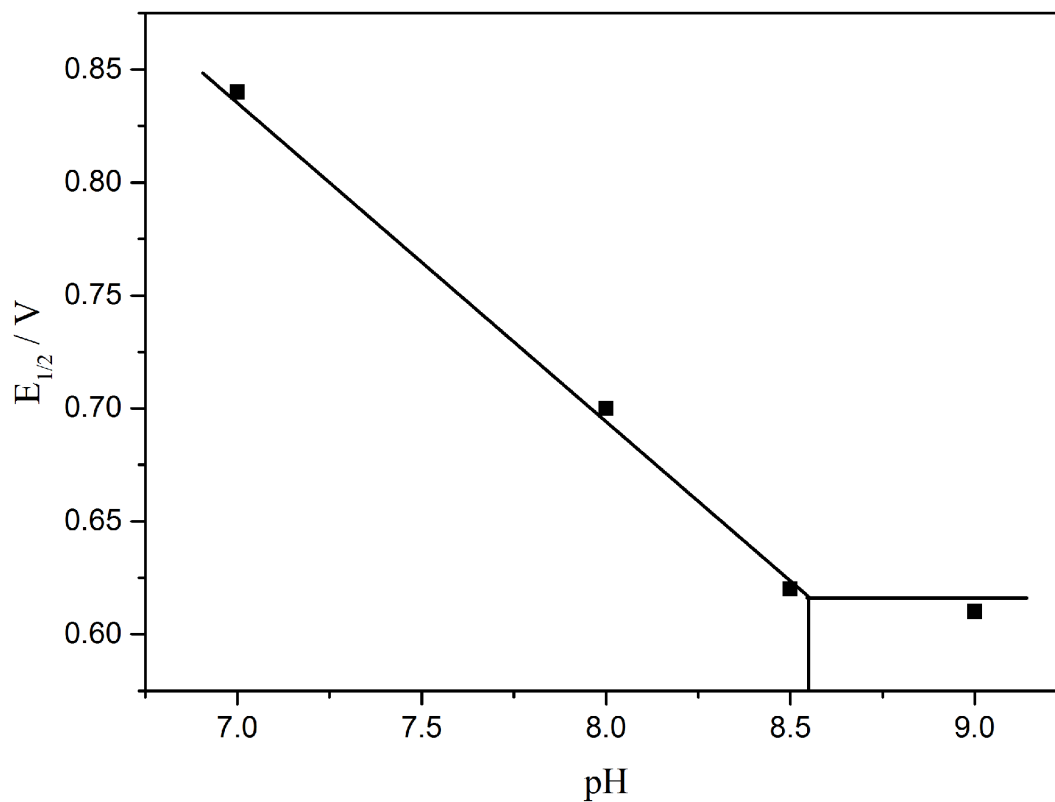

**Figure S9.** Pourbaix diagram of 1 mM  $\text{Co}_4\text{O}_4\text{-dpk}$  in the pH range of 7-9.

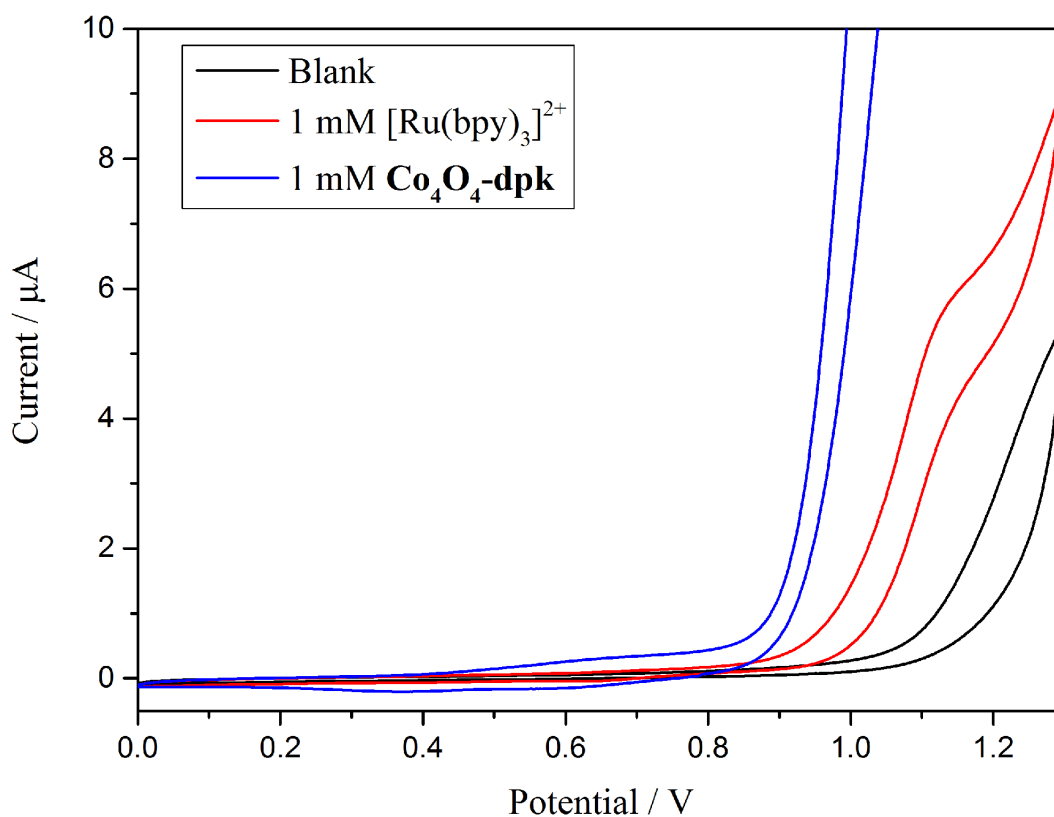

**Figure S10.** Cyclic voltammograms of 1 mM  $\text{Co}_4\text{O}_4\text{-dpk}$  (blue) and 1 mM  $[\text{Ru}(\text{bpy})_3]\text{Cl}_2$  (red) in 80 mM pH 8.5 borate buffer.

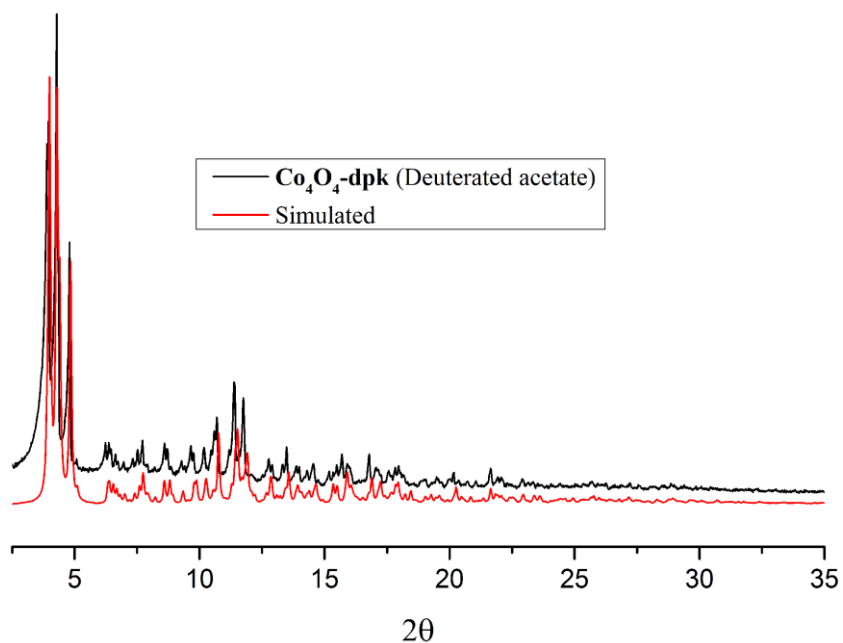

**Figure S11.** PXRD pattern (black) of **Co<sub>4</sub>O<sub>4</sub>-dpk(OAc-d<sub>3</sub>)** vs. calculated data (red).

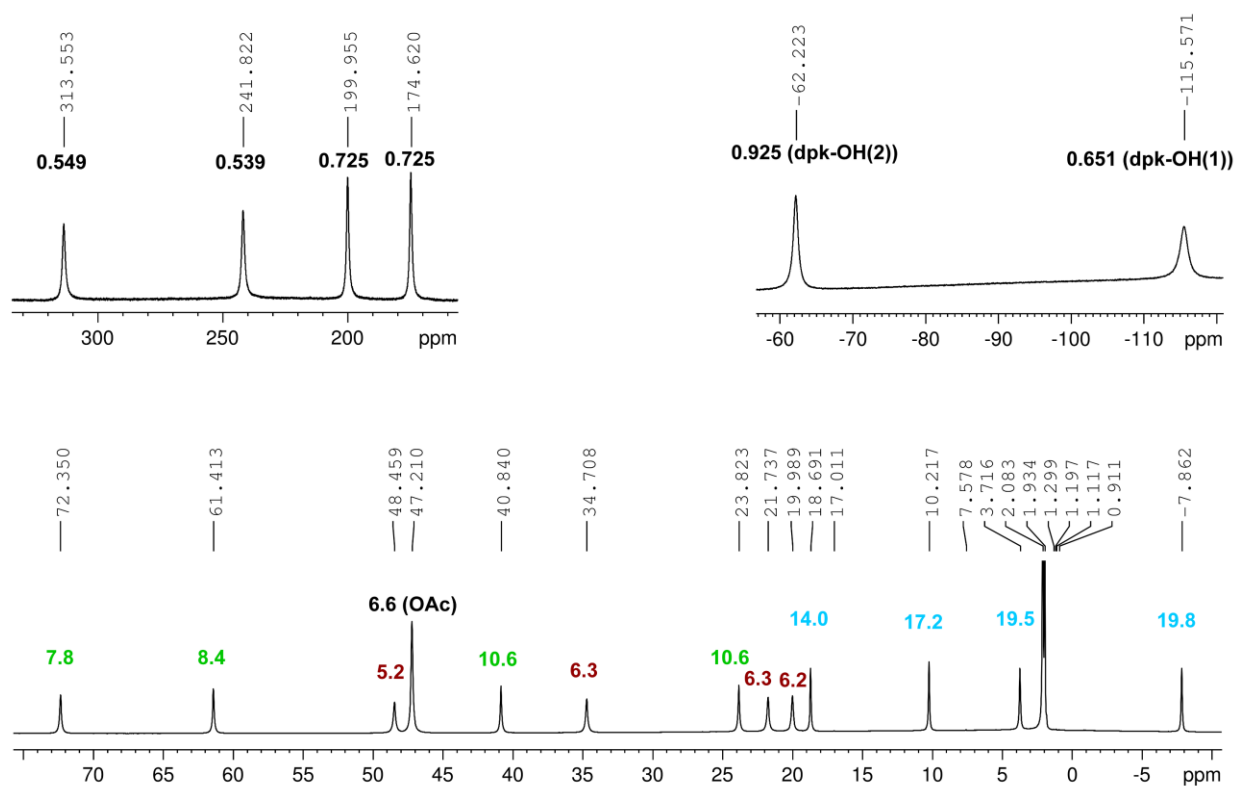

**Figure S12.** <sup>1</sup>H NMR spectrum of **Co<sub>4</sub>O<sub>4</sub>-dpk** in CD<sub>3</sub>CN with T<sub>1</sub> values given in ms (proton groups are indicated by the following color code (cf. Figure 3): black = ortho, red = meta(1), green = meta(2), blue = para).

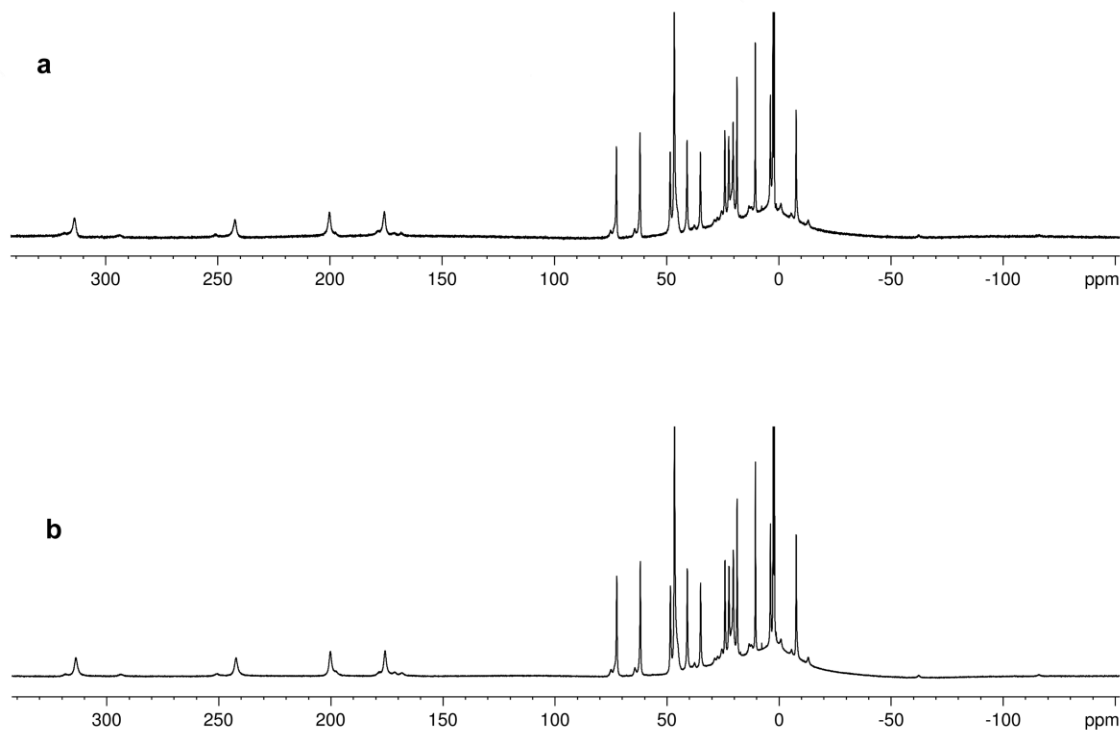

**Figure S13.**  $^1\text{H}$  NMR spectrum of **Co<sub>4</sub>O<sub>4</sub>-dpk** in  $\text{CD}_3\text{CN}$  (a) immediately after  $\text{D}_2\text{O}$  addition and (b) 30 h later.

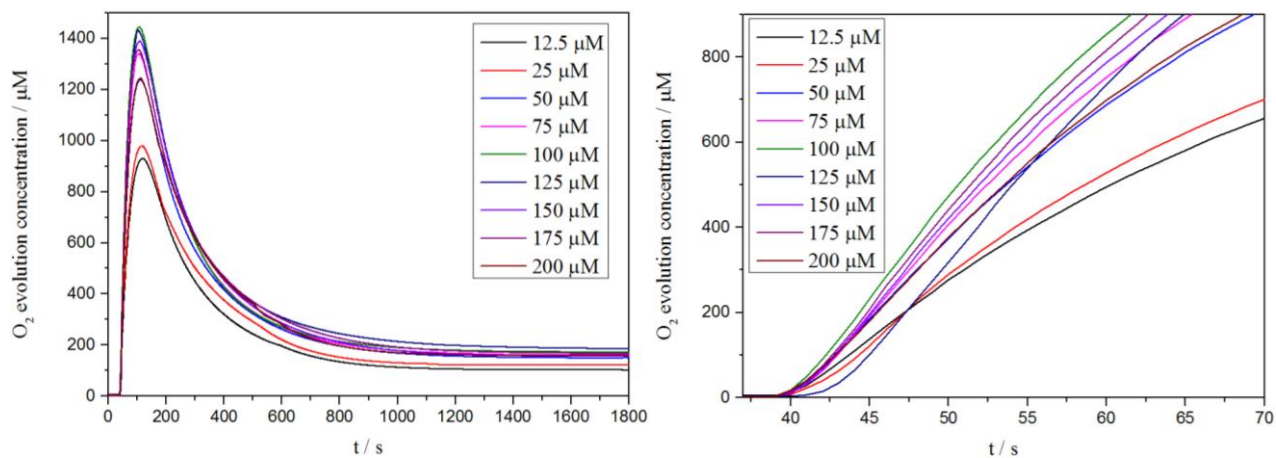

**Figure S14.** Clark electrode kinetics of visible light-driven water oxidation catalyzed by various concentrations of **Co<sub>4</sub>O<sub>4</sub>-dpk** cubane (conditions: 470 nm LED; 1 mM  $[\text{Ru}(\text{bpy})_3]\text{Cl}_2$ ; 5 mM  $\text{Na}_2\text{S}_2\text{O}_8$ ; pH 8.5, 80 mM borate buffer).



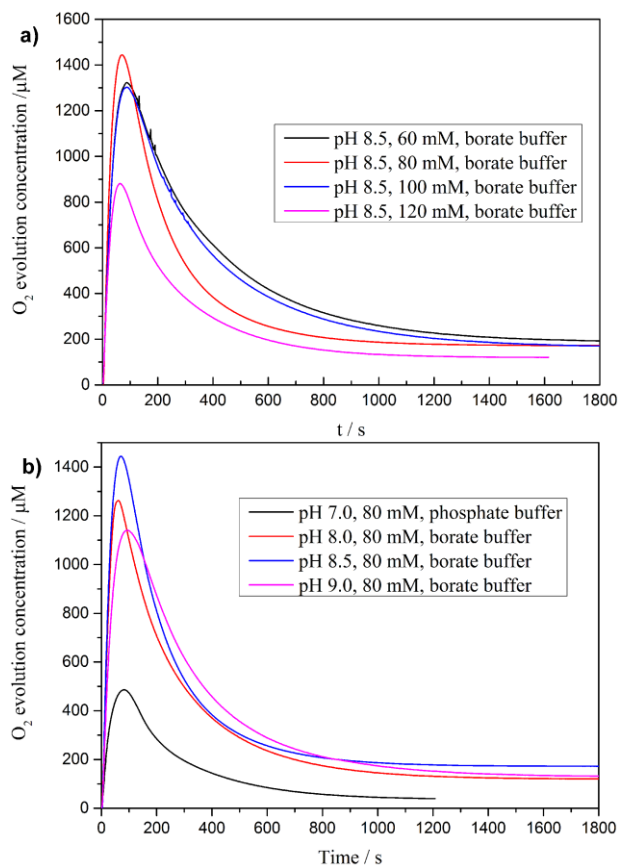

**Figure S15.** (a) Clark electrode kinetics (long-time data of Figure 4) of visible light-driven water oxidation catalyzed by **Co<sub>4</sub>O<sub>4</sub>-dpk** cubane in different concentrations of pH 8.5 borate buffer; (b) visible light-driven water oxidation catalyzed by 100 μM of **Co<sub>4</sub>O<sub>4</sub>-dpk** at pH 7.0 (80 mM phosphate buffer solution), 8.0, 8.5, and 9.0 (80 mM borate buffer solution, respectively); conditions: 470 nm LED; 1 mM [Ru(bpy)<sub>3</sub>]Cl<sub>2</sub>; 5 mM Na<sub>2</sub>S<sub>2</sub>O<sub>8</sub>.

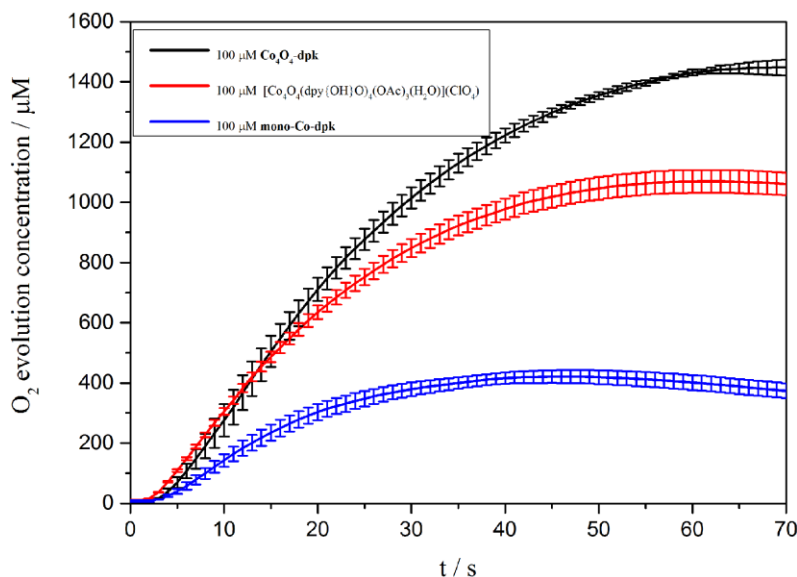

**Figure S16.** Clark electrode kinetics of visible light-driven water oxidation catalyzed by 100 μM of **Co<sub>4</sub>O<sub>4</sub>-dpk** (black), **[Co<sub>4</sub>O<sub>4</sub>(dpy{OH}O)<sub>4</sub>(OAc)<sub>3</sub>(H<sub>2</sub>O)](ClO<sub>4</sub>)** (red), and **[Co<sup>III</sup>(dpy{OH}O)<sub>2</sub>](ClO<sub>4</sub>)** (**mono-Co-dpk**), respectively (blue); conditions: 470 nm LED; 1 mM [Ru(bpy)<sub>3</sub>]Cl<sub>2</sub>; 5 mM Na<sub>2</sub>S<sub>2</sub>O<sub>8</sub>; pH 8.5, 80 mM borate buffer.

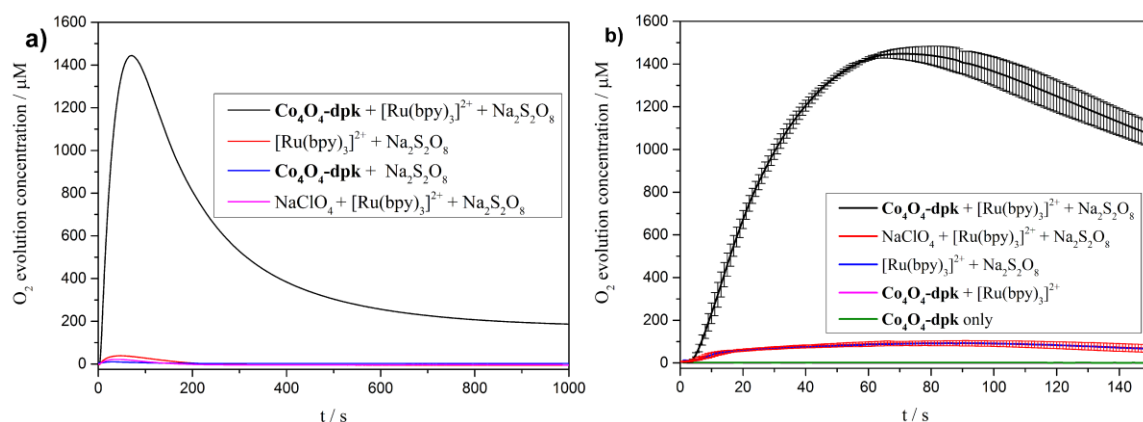

**Figure S17.** (a) Clark electrode kinetics of visible light-driven water oxidation catalyzed by 100 μM of **Co<sub>4</sub>O<sub>4</sub>-dpk** (black), 200 μM NaClO<sub>4</sub> (pink) vs. no catalyst (red) and of a control experiment without [Ru(bpy)<sub>3</sub>]Cl<sub>2</sub> (blue), respectively; (b) additional control experiments in the presence of 100 μM of **Co<sub>4</sub>O<sub>4</sub>-dpk** and [Ru(bpy)<sub>3</sub>]Cl<sub>2</sub> (pink) and of **Co<sub>4</sub>O<sub>4</sub>-dpk** only (green) (conditions: 470 nm LED; 1 mM [Ru(bpy)<sub>3</sub>]Cl<sub>2</sub>; 5 mM Na<sub>2</sub>S<sub>2</sub>O<sub>8</sub>; pH 8.5, 80 mM borate buffer).

**Table S4.** Photocatalytic water oxidation performance with different concentrations of **Co<sub>4</sub>O<sub>4</sub>-dpk**.

| Catalyst concentration/μM | O <sub>2</sub> area | N <sub>2</sub> area | O <sub>2</sub> /μmol | <sup>a</sup> O <sub>2</sub> yield | <sup>b</sup> TON | <sup>c</sup> TOF / s <sup>-1</sup> |
|---------------------------|---------------------|---------------------|----------------------|-----------------------------------|------------------|------------------------------------|
| 12.5                      | 892.7               | 34.5                | 9.6                  | 48%                               | 96.0             | 1.2                                |
| 25                        | 1075.4              | 55.8                | 11.5                 | 57.5%                             | 57.5             | 0.63                               |
| 50                        | 1215.3              | 56.5                | 13.1                 | 65.5%                             | 32.8             | 0.40                               |
| 75                        | 1341.8              | 33.8                | 14.4                 | 72.0%                             | 24.0             | 0.30                               |
| 100                       | 1488.8              | 55.4                | 16.0                 | 80.0%                             | 20.0             | 0.24                               |
| 125                       | 1377.3              | 48.3                | 14.8                 | 74.0%                             | 14.8             | 0.19                               |
| 150                       | 1388                | 77                  | 14.7                 | 73.5%                             | 12.2             | 0.15                               |
| 175                       | 1338.3              | 17.2                | 14.5                 | 72.5%                             | 10.4             | 0.13                               |
| 200                       | 1314                | 24.3                | 14.2                 | 71.1%                             | 8.88             | 0.10                               |

<sup>a</sup>O<sub>2</sub> yield = 2 × mole of O<sub>2</sub> (GC)/mole of Na<sub>2</sub>S<sub>2</sub>O<sub>8</sub>. <sup>b</sup>TON = mole of O<sub>2</sub> (GC)/mole of catalyst. <sup>c</sup>TOF<sub>initial</sub> = initial concentration of O<sub>2</sub> evolution rate (Clark electrode kinetics in 60 s)/catalyst concentration. Conditions: 470 nm LED; pH 8.5 80 mM, borate buffer; 1 mM [Ru(bpy)<sub>3</sub>]Cl<sub>2</sub>; 5 mM Na<sub>2</sub>S<sub>2</sub>O<sub>8</sub>.

**Table S5.** Photocatalytic water oxidation performance of **Co<sub>4</sub>O<sub>4</sub>-dpk** in different buffer solutions.

| Buffer solution /type         | O <sub>2</sub> area | N <sub>2</sub> area | O <sub>2</sub> /μmol | <sup>a</sup> O <sub>2</sub> yield | <sup>b</sup> TON | <sup>c</sup> TOF / s <sup>-1</sup> |
|-------------------------------|---------------------|---------------------|----------------------|-----------------------------------|------------------|------------------------------------|
| pH 7.0<br>80 mM phosphate     | 204.2               | 21.2                | 2.4                  | 12%                               | 3.0              | 0.08                               |
| pH 8.0<br>80 mM phosphate     | 621.3               | 63.1                | 6.7                  | 34%                               | 8.4              |                                    |
| pH 8.0<br>80 mM borate buffer | 1020.5              | 34.9                | 11.0                 | 55.0%                             | 13.8             | 0.18                               |
| pH 8.5<br>80 mM borate buffer | 1488.8              | 55.4                | 16.0                 | 80%                               | 20.0             | 0.24                               |
| pH 9.0<br>80 mM borate buffer | 1247.8              | 24.5                | 13.5                 | 67.5%                             | 16.9             | 0.21                               |

<sup>a</sup>O<sub>2</sub> yield = 2 × mole of O<sub>2</sub> (GC)/mole of Na<sub>2</sub>S<sub>2</sub>O<sub>8</sub>. <sup>b</sup>TON = mole of O<sub>2</sub> (GC)/mole of catalyst. <sup>c</sup>TOF<sub>initial</sub> = initial concentration of O<sub>2</sub> evolution rate (Clark electrode kinetics in 60 s)/catalyst concentration. Conditions: 470 nm LED; 100 μM of **Co<sub>4</sub>O<sub>4</sub>-dpk**; 1 mM [Ru(bpy)<sub>3</sub>]Cl<sub>2</sub>; 5 mM Na<sub>2</sub>S<sub>2</sub>O<sub>8</sub>.

**Table S6.** Photocatalytic water oxidation performance of **Co<sub>4</sub>O<sub>4</sub>-dpk** in different concentrations of borate buffer.

| Borate buffer pH 8.5 concentration | O <sub>2</sub> area | N <sub>2</sub> area | O <sub>2</sub> /μmol | <sup>a</sup> O <sub>2</sub> yield | <sup>b</sup> TON | <sup>c</sup> TOF / s <sup>-1</sup> |
|------------------------------------|---------------------|---------------------|----------------------|-----------------------------------|------------------|------------------------------------|
| 40 mM                              | 1072.1              | 40.2                | 11.5                 | 57.5%                             | 14.4             |                                    |
| 60 mM                              | 1269.5              | 11.8                | 13.8                 | 69.0%                             | 17.2             | 0.21                               |
| 80 mM                              | 1488.8              | 55.4                | 16.0                 | 80%                               | 20.0             | 0.24                               |
| 90 mM                              | 1280.5              | 11                  | 14.0                 | 70%                               | 17.5             | 0.20                               |
| 100 mM                             | 1271.4              | 25.3                | 13.8                 | 69.0%                             | 17.2             | 0.20                               |
| 120 mM                             | 1170.6              | 21.5                | 12.7                 | 63.5%                             | 15.9             | 0.15                               |

<sup>a</sup>O<sub>2</sub> yield = 2 × mole of O<sub>2</sub> (GC)/mole of Na<sub>2</sub>S<sub>2</sub>O<sub>8</sub>. <sup>b</sup>TON = mole of O<sub>2</sub> (GC)/mole of catalyst. <sup>c</sup>TOF<sub>initial</sub> = initial concentration of O<sub>2</sub> evolution rate (Clark electrode kinetics in 60 s)/catalyst concentration. Conditions: 470 nm LED; 100 μM of **Co<sub>4</sub>O<sub>4</sub>-dpk**; 1 mM [Ru(bpy)<sub>3</sub>]Cl<sub>2</sub>; 5 mM Na<sub>2</sub>S<sub>2</sub>O<sub>8</sub>.

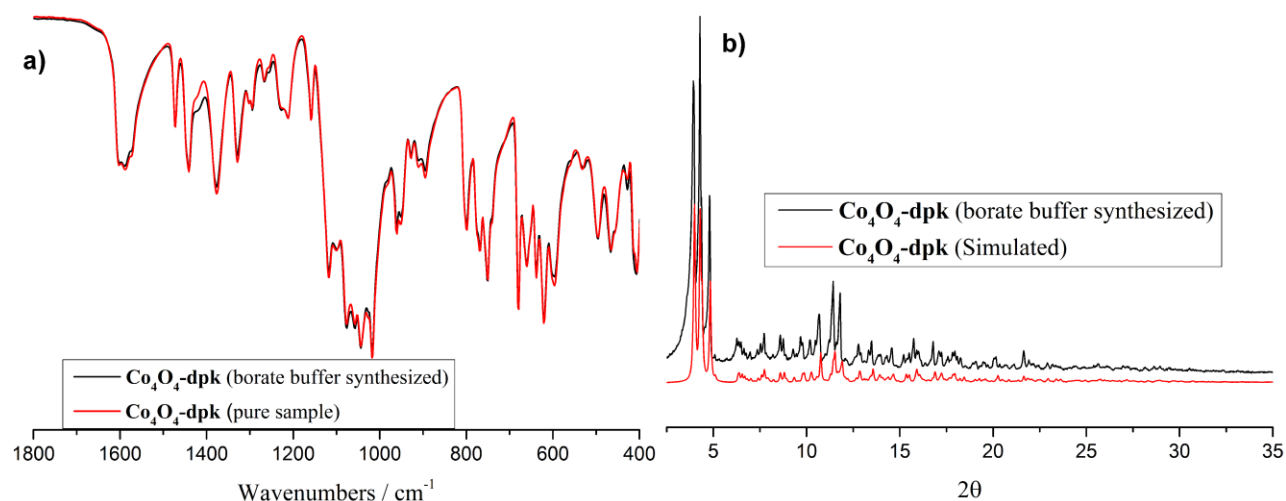

**Figure S18.** (a) FT-IR spectra of **Co<sub>4</sub>O<sub>4</sub>-dpk** synthesized from borate buffer (black) vs. pristine **Co<sub>4</sub>O<sub>4</sub>-dpk** (red), (b) PXRD pattern (black) of **Co<sub>4</sub>O<sub>4</sub>-dpk** synthesized from borate buffer solution vs. calculated PXRD pattern of **Co<sub>4</sub>O<sub>4</sub>-dpk** (red).

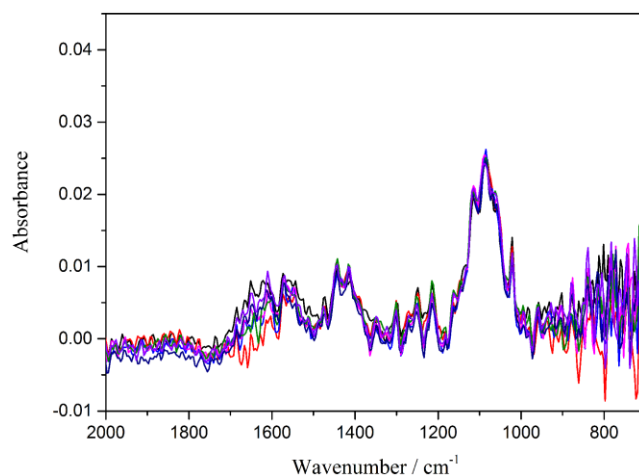

**Figure S19.** Time-dependent FT-IR spectra of **Co<sub>4</sub>O<sub>4</sub>-dpk** cubane (20 mM) in pH 8.5, 80 mM borate buffer over 2 h.

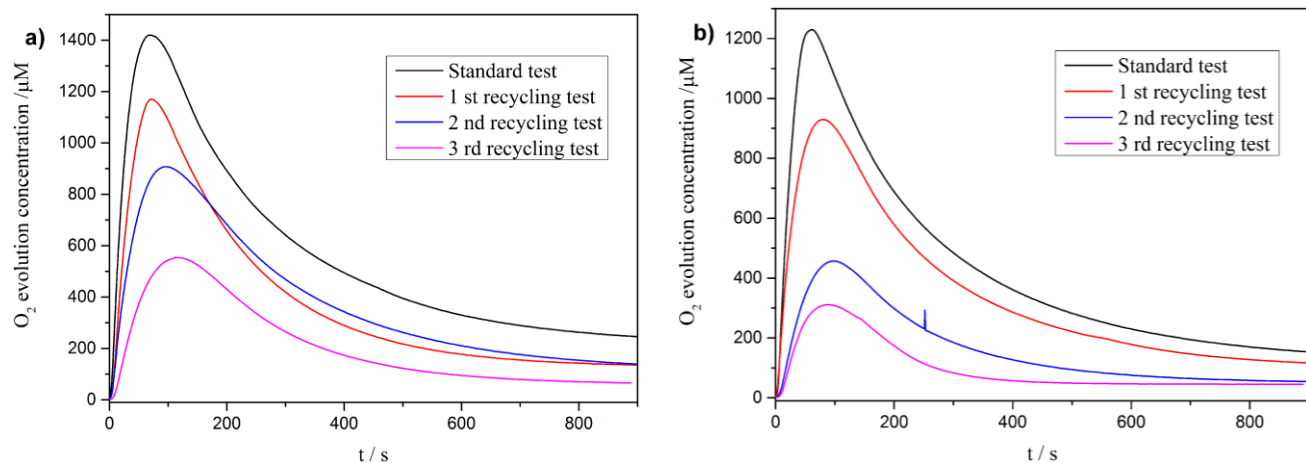

**Figure S20.** (a) Clark electrode kinetics of visible light-driven water oxidation of the recycling test of 100  $\mu\text{M}$   $\text{Co}_4\text{O}_4\text{-dpk}$  cubane vs. (b) 400  $\mu\text{M}$   $\text{Co}_2(\text{OAc})_2$  (conditions: 470 nm LED; 1 mM  $[\text{Ru}(\text{bpy})_3]\text{Cl}_2$ ; 5 mM  $\text{Na}_2\text{S}_2\text{O}_8$ ; pH 8.5, 80 mM (only the standard test solution) borate buffer), respectively. The pH value was readjusted to 8.5 by adding solid  $\text{Na}_2\text{B}_4\text{O}_7$  after each activity test. (Both series were recorded within several hours on the same day based on the same calibration of the applied Clark electrode.)

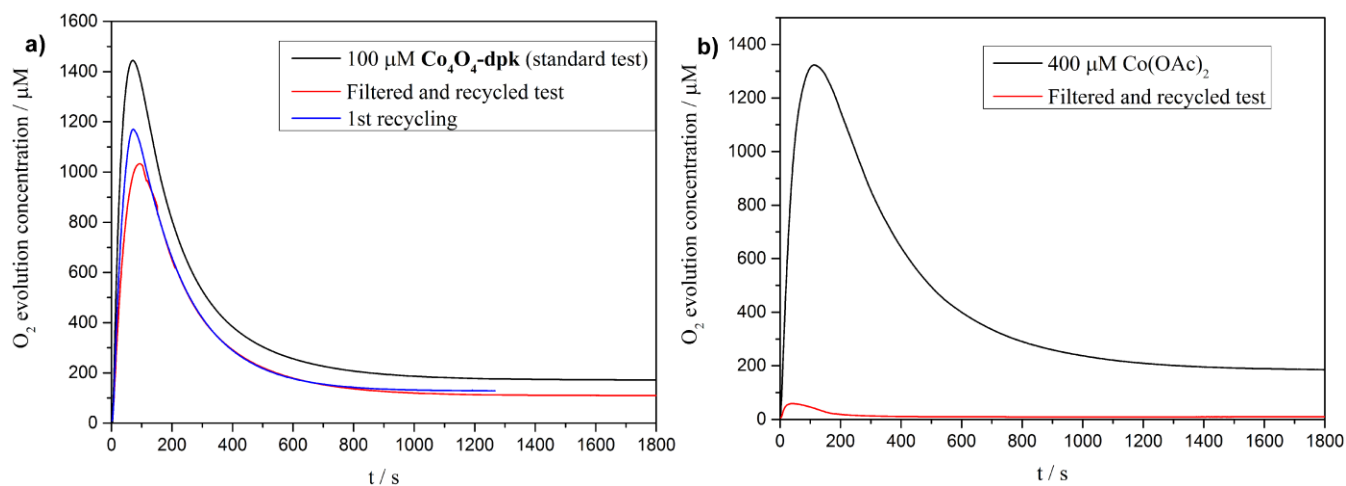

**Figure S21.** Clark electrode kinetics of visible light-driven water oxidation of the filtered post-catalytic reaction solutions of 100  $\mu\text{M}$   $\text{Co}_4\text{O}_4\text{-dpk}$  cubane (a) and 400  $\mu\text{M}$   $\text{Co}(\text{OAc})_2$  (b) (conditions: 470 nm LED; 1 mM  $[\text{Ru}(\text{bpy})_3]\text{Cl}_2$ ; 5 mM  $\text{Na}_2\text{S}_2\text{O}_8$ ; pH 8.5, 80 mM (only the standard test solution) borate buffer), respectively. The pH value was readjusted to 8.5 by adding solid  $\text{Na}_2\text{B}_4\text{O}_7$  after each activity test.

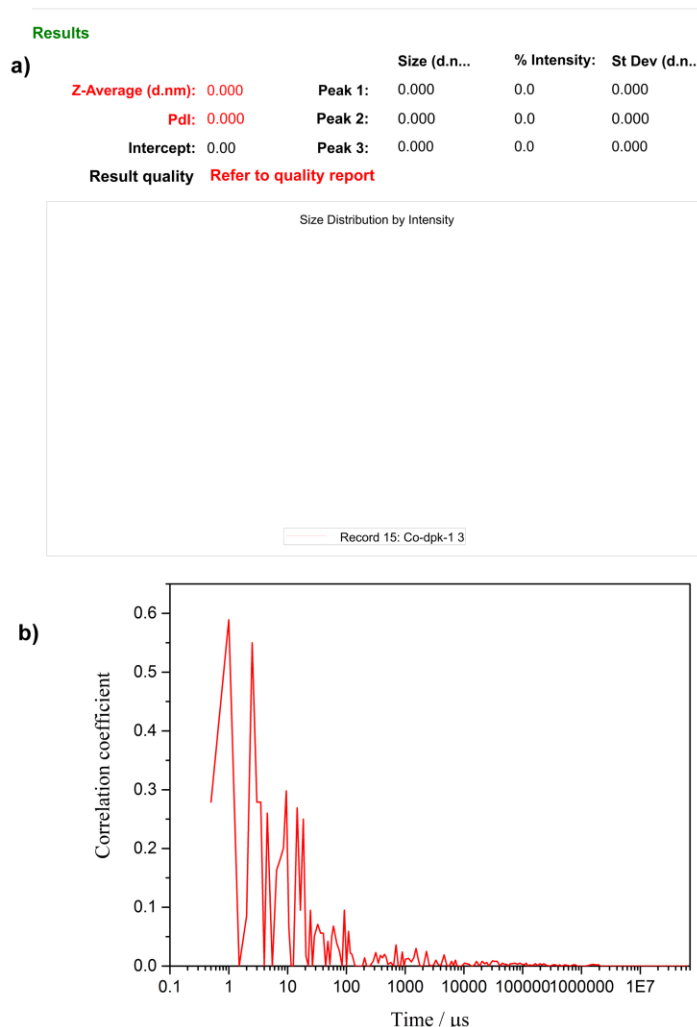

**Figure S22.** Dynamic light scattering measurement of the post-catalytic reaction solution of 100  $\mu\text{M}$  **Co<sub>4</sub>O<sub>4</sub>-dpk** cubane (470 nm LED, pH 8.5, 80 mM borate buffer, 1 mM [Ru(bpy)<sub>3</sub>]Cl<sub>2</sub>, 5 mM Na<sub>2</sub>S<sub>2</sub>O<sub>8</sub>): (a) size distribution report; (b) low quality correlation function with a very small count rate of 3.5 kps indicating the existence of only a very small amount of nanoparticles.

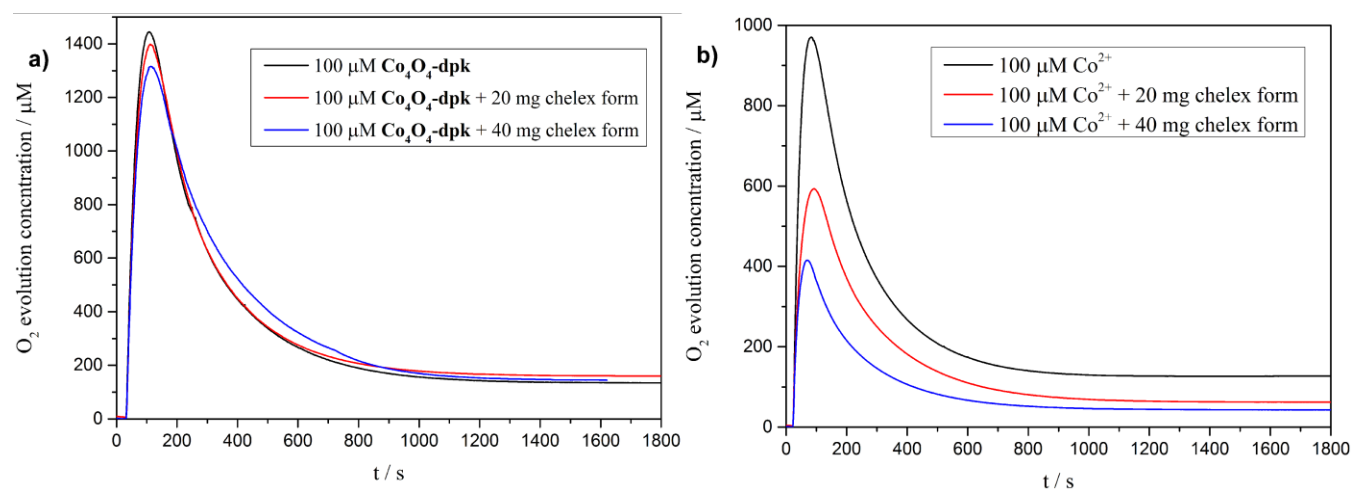

**Figure S23.** (a) Clark electrode kinetics of visible light-driven water oxidation catalyzed by 100  $\mu\text{M}$  **Co<sub>4</sub>O<sub>4</sub>-dpk** cubane chelated by different amounts of Chelex (sodium form) vs. (b) 100  $\mu\text{M}$  Co(OAc)<sub>2</sub> (conditions: 470 nm LED; 1 mM [Ru(bpy)<sub>3</sub>]Cl<sub>2</sub>; 5 mM Na<sub>2</sub>S<sub>2</sub>O<sub>8</sub>; pH 8.5, 80 mM borate buffer).

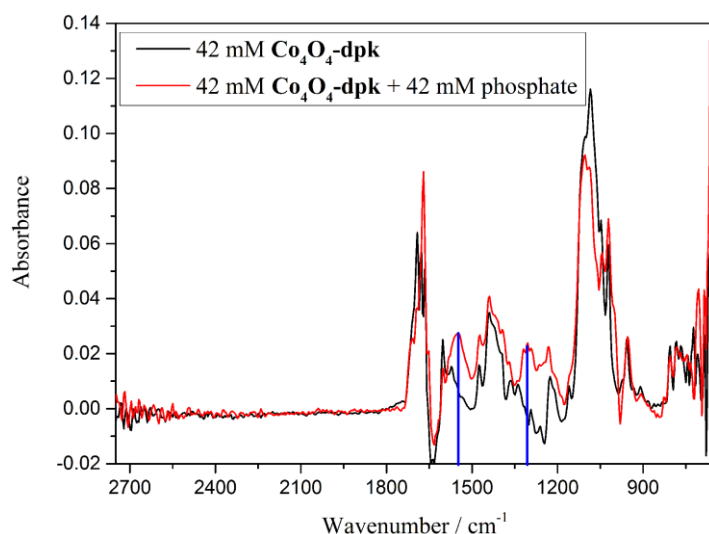

**Figure S24.** FT-IR spectra of **Co<sub>4</sub>O<sub>4</sub>-dpk** (42 mM) in pure formamide (black) and in formamide containing 42 mM phosphate (red).

**Table S7.** Selected distances and Debye-Waller factors from the EXAFS fit for **Co<sub>4</sub>O<sub>4</sub>-dpk** before and after photocatalytic oxygen evolution.

In the EXAFS fit, we used 8 and 10 fitting parameters for the precatalytic and postcatalytic sample, respectively. Since 12 and 15 parameters could be used for the precatalytic and postcatalytic sample, respectively, according to the Nyquist criterion,<sup>1</sup> both fits can be considered as reasonable. For both EXAFS fits the applied parameters include a parameter for refinement of the amplitude and a parameter for the energy shift  $E_0$ , and these parameters were used as global parameters for all scattering paths. The distances were changed proportionally using 4 and 5 independent parameters for the precatalytic and postcatalytic sample, respectively. The Debye-Waller factors were refined using 2 and 3 independent parameters based on the chemical nature of the scattering atom for the precatalytic and postcatalytic sample, respectively.

|     |       | N | pre catalysis                  |                | post catalysis                 |                | $r_{\text{SXRD}}/\text{\AA}$ |
|-----|-------|---|--------------------------------|----------------|--------------------------------|----------------|------------------------------|
|     |       |   | $\sigma^2/10^{-3}\text{\AA}^2$ | $r/\text{\AA}$ | $\sigma^2/10^{-3}\text{\AA}^2$ | $r/\text{\AA}$ |                              |
| Co1 | O3    | 1 | 9±5                            | 2.03±0.02      | 4±1                            | 1.857±0.008    | 2.050                        |
|     | N2    | 1 | 6±2                            | 2.05±0.02      | 4±1                            | 1.876±0.009    | 2.071                        |
|     | O3    | 1 | 9±5                            | 2.09±0.02      | 4±1                            | 1.97±0.03      | 2.116                        |
|     | N3    | 2 | 6±2                            | 2.17±0.02      | 4±1                            | 2.13±0.02      | 2.133                        |
|     | O1    | 1 | 9±5                            | 2.19±0.02      | 4±1                            | 2.14±0.02      | 2.151                        |
|     | Co1   | 1 | 2.3±0.8                        | 3.07±0.01      | 12±3                           | 2.97±0.03      | 3.072                        |
|     | Co2.1 | 1 | 2.3±0.8                        | 3.21±0.01      | 12±3                           | 3.10±0.04      | 3.207                        |
|     | Co2.2 | 1 | 2.3±0.8                        | 3.30±0.01      | 12±3                           | 3.19±0.04      | 3.299                        |
| Co2 | O6    | 1 | 9±5                            | 2.01±0.02      | 4±1                            | 1.836±0.008    | 2.027                        |
|     | O1    | 1 | 9±5                            | 2.05±0.02      | 4±1                            | 1.872±0.009    | 2.067                        |
|     | O5    | 1 | 6±2                            | 2.08±0.02      | 4±1                            | 1.96±0.03      | 2.105                        |
|     | N1    | 1 | 6±2                            | 2.17±0.02      | 4±1                            | 2.12±0.02      | 2.129                        |
|     | O1    | 1 | 9±2                            | 2.18±0.02      | 4±1                            | 1.936±0.009    | 2.138                        |
|     | O3    | 1 | 9±2                            | 2.22±0.02      | 4±1                            | 1.971±0.009    | 2.176                        |
|     | Co2   | 1 | 2.3±0.8                        | 3.16±0.01      | 12±3                           | 3.06±0.03      | 3.165                        |
|     | Co1.1 | 1 | 2.3±0.8                        | 3.21±0.01      | 12±3                           | 3.10±0.04      | 3.207                        |
|     | Co1.2 | 1 | 2.3±0.8                        | 3.30±0.01      | 12±3                           | 3.19±0.04      | 3.299                        |

$r$  = distances between atom 1-atom 2;  $\sigma^2/\text{\AA}^2$  = Debye-Waller factor;  $N$  = scattering path

(1) Stern, E. A. *Phys. Rev. B* **1993**, 48, 9825-9827.

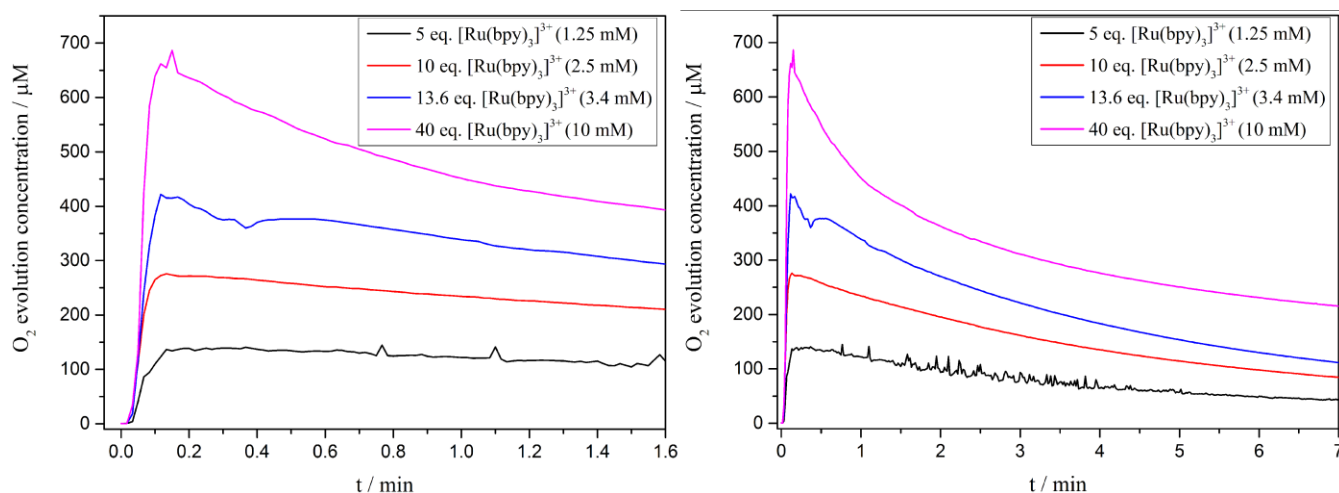

**Figure S25.** Clark electrode kinetics of chemical water oxidation catalyzed by 250  $\mu\text{M}$   $\text{Co}_4\text{O}_4\text{-dpk}$  with various amounts of  $[\text{Ru}(\text{bpy})_3](\text{ClO}_4)_3$  oxidant.

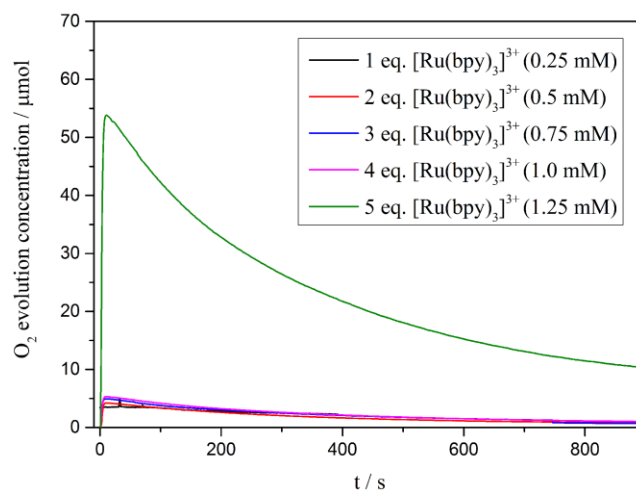

**Figure S26.** Clark electrode kinetics of chemical water oxidation catalyzed by 250  $\mu\text{M}$   $\text{Co}_4\text{O}_4\text{-dpk}$  with increasing equivalents of  $[\text{Ru}(\text{bpy})_3](\text{ClO}_4)_3$  oxidant (after subtraction of background  $\text{O}_2$  evolution in the absence of catalyst).

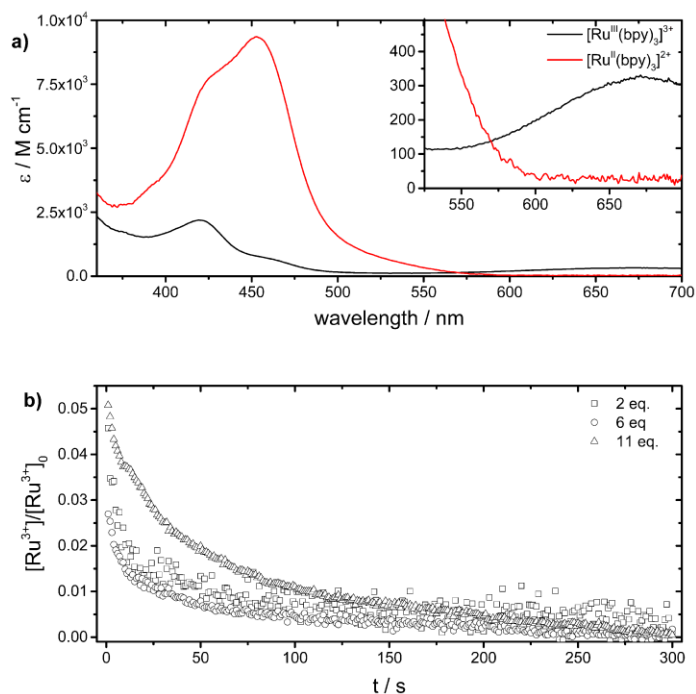

**Figure S27.** (a) UV/vis spectrum of  $[\text{Ru}(\text{bpy})_3](\text{ClO}_4)_3$  in 0.5 M  $\text{H}_2\text{SO}_4$  (black curve) and in pH 8.5 borate buffer (red curve) after 30 min ageing time; (b) UV/vis kinetics of 100  $\mu\text{M}$   $\text{Co}_4\text{O}_4\text{-dpk}$  catalyzed chemical water oxidation with various amounts of  $[\text{Ru}(\text{bpy})_3](\text{ClO}_4)_3$  oxidant ( $[\text{Ru}(\text{bpy})_3]^{3+}$  concentrations were determined from the absorption at 675 nm).

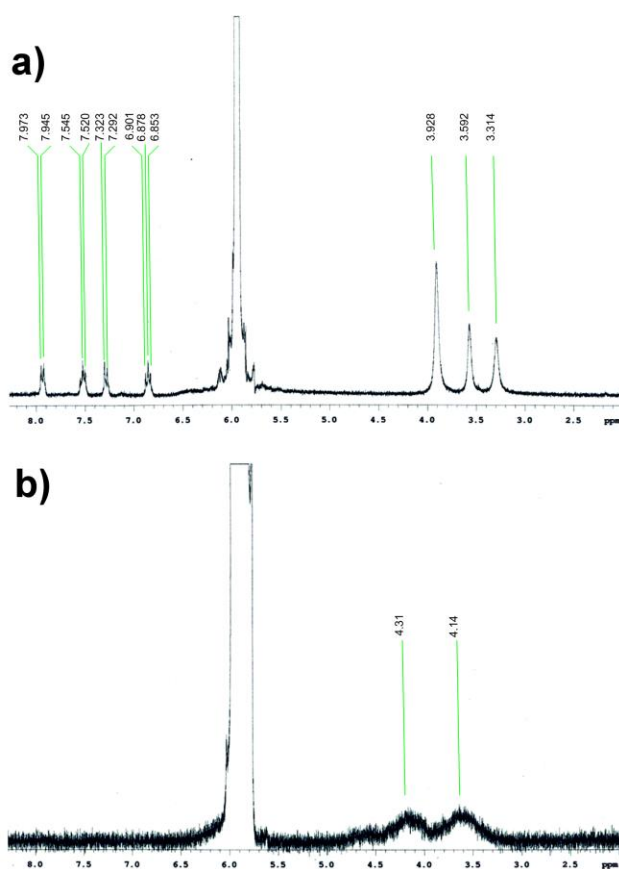

**Figure S28.**  $^1\text{H}$  NMR spectra of (a)  $[(\text{NH}_3)_4\text{Co(III)sal}]\text{Cl}$  precursor and (b)  $[(\text{NH}_3)_4\text{Co(IV)sal-NO}_2]\text{ClO}_3$  reference.



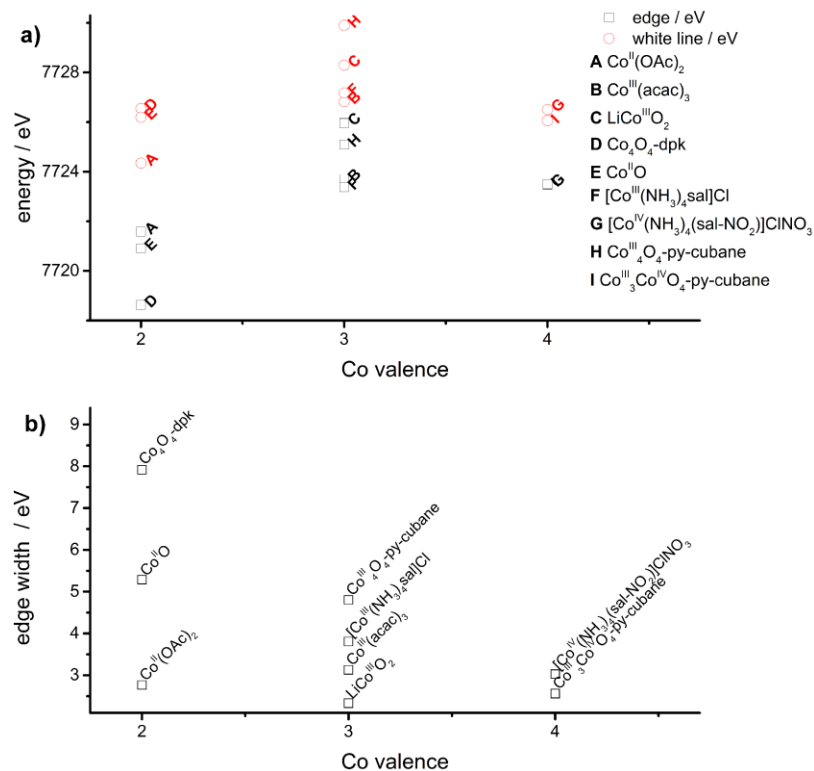

**Figure S29.** (a) Comparison of the edge position and white line for different cobalt containing samples; (b) corresponding edge width (difference of white line and edge position).

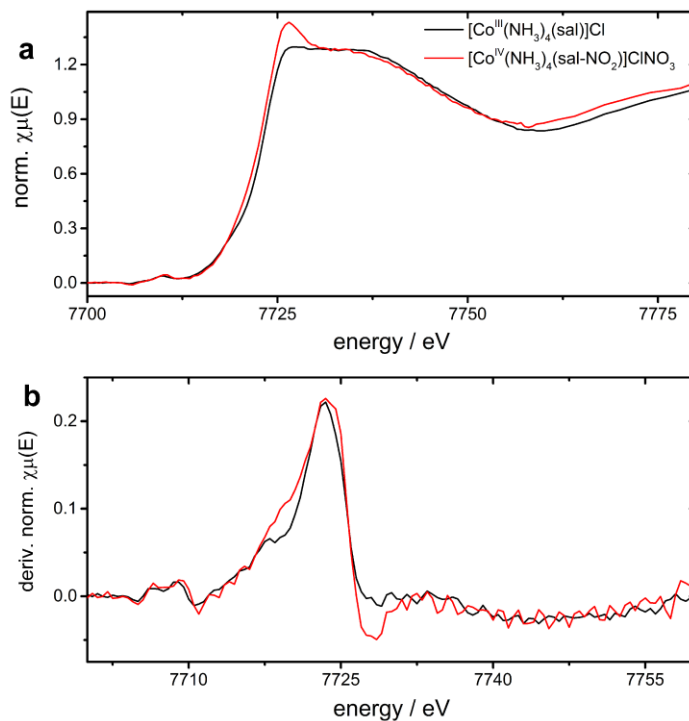

**Figure S30.** Normalized XANES spectra of  $[(\text{NH}_3)_4\text{Co}(\text{III})\text{sal}]\text{Cl}$  and  $[(\text{NH}_3)_4\text{Co}(\text{IV})\text{sal-NO}_2]\text{ClO}_3$  (a) and 1<sup>st</sup> derivative of the normalized spectra (b).

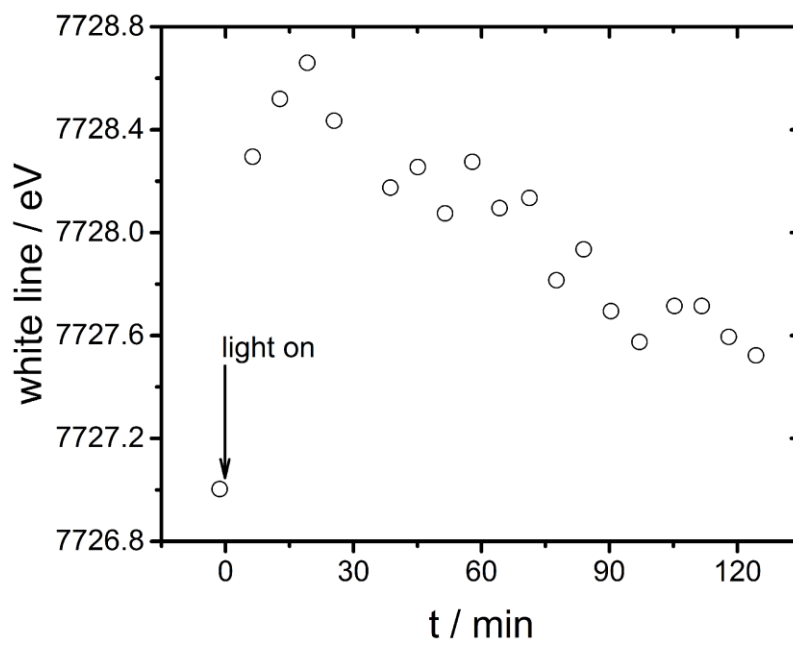

**Figure S31.** White line positions of XANES monitoring of 100  $\mu\text{M}$   $\text{Co}_4\text{O}_4\text{-dpk}$  in pH 8.5 borate buffer.

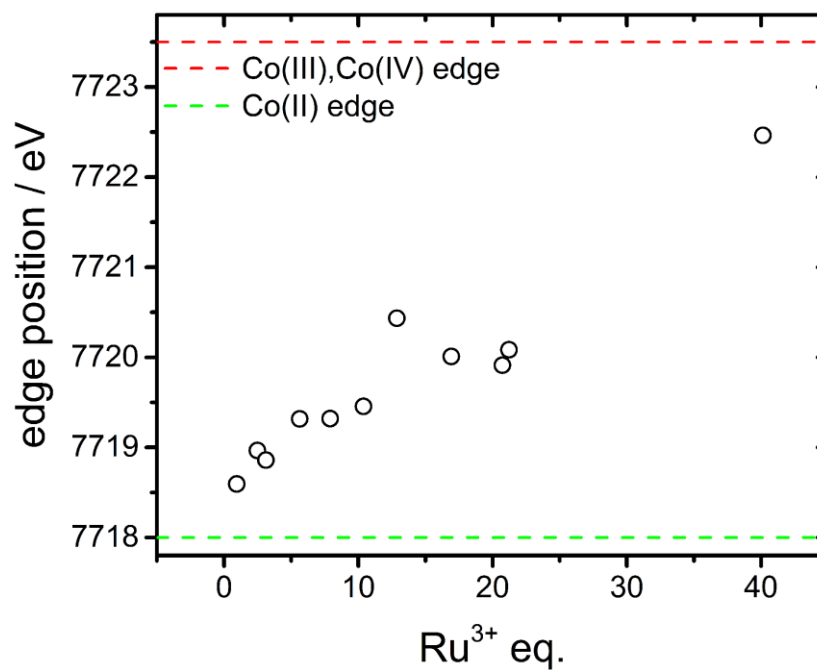

**Figure S32.** Cobalt K-edge position for 250  $\mu\text{M}$   $\text{Co}_4\text{O}_4\text{-dpk}$  upon chemical oxidation with various amounts of  $[\text{Ru}(\text{bpy})_3](\text{ClO}_4)_3$  at 40 K.

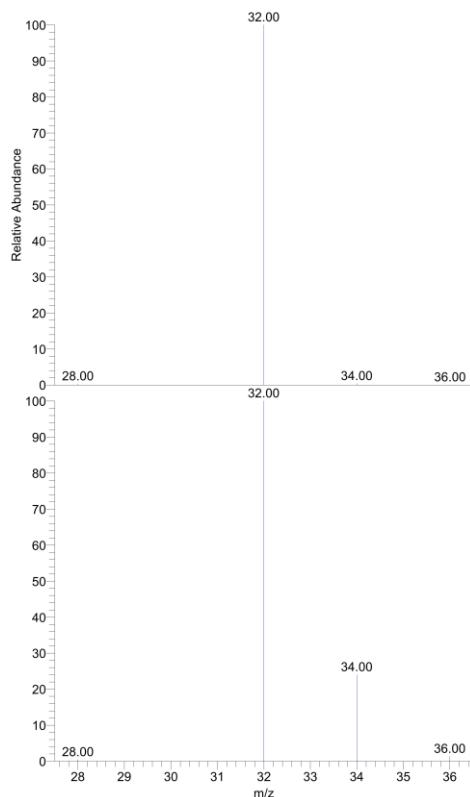

**Figure S33.** Electron impact ionization mass spectra of the gas sample evolved during the irradiation of  $\text{H}_2^{16}\text{O}$  (top) and  $\text{H}_2^{18}\text{O}$  (10.8 at%  $^{18}\text{O}$ ) (bottom) containing borate buffer solutions (pH 8.5, 80 mM) with 100  $\mu\text{M}$  of **Co<sub>4</sub>O<sub>4</sub>-dpk** cubane, 1 mM  $[\text{Ru}(\text{bpy})_3]\text{Cl}_2$ , and 5 mM  $\text{Na}_2\text{S}_2\text{O}_8$ .

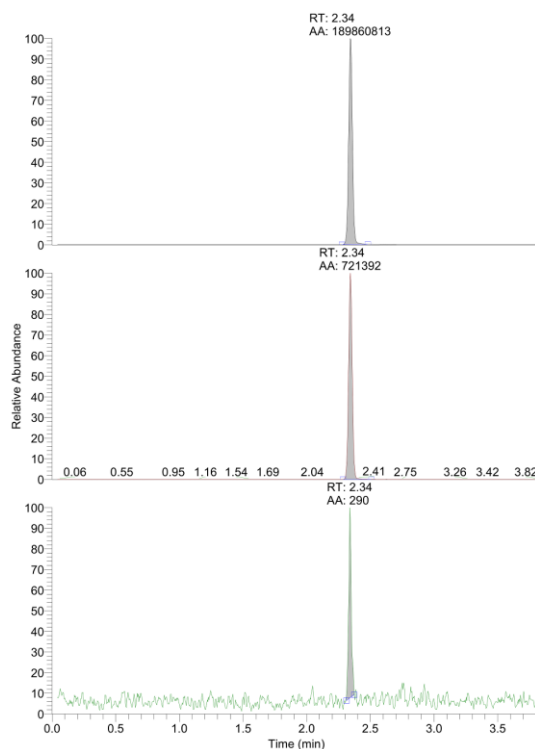

**Figure S34.** GC data of  $^{32}\text{O}_2$  (top),  $^{34}\text{O}_2$  (middle), and  $^{36}\text{O}_2$  (bottom) evolved during the irradiation of a  $\text{H}_2^{16}\text{O}$  containing borate buffer (pH 8.5, 80 mM) solution with 100  $\mu\text{M}$  of **Co<sub>4</sub>O<sub>4</sub>-dpk** cubane, 1 mM  $[\text{Ru}(\text{bpy})_3]\text{Cl}_2$ , and 5 mM  $\text{Na}_2\text{S}_2\text{O}_8$ .

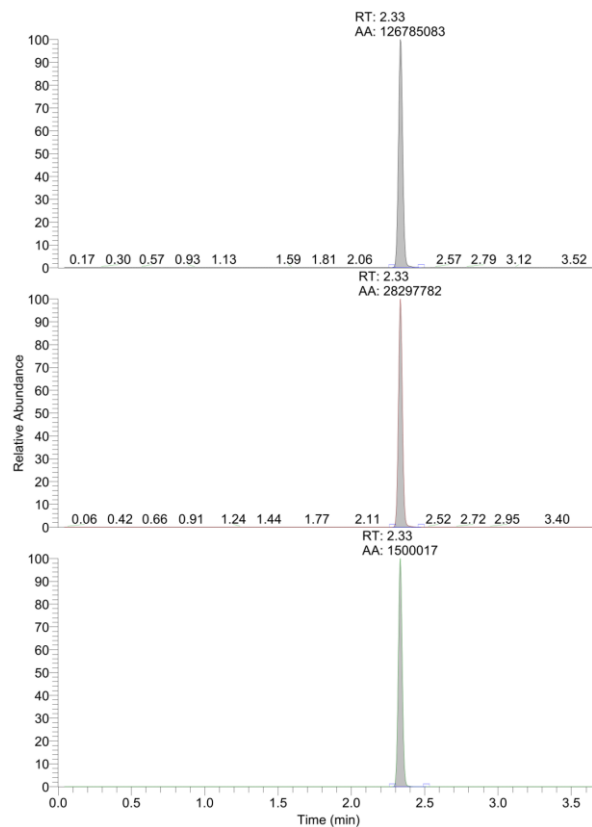

**Figure S35.** GC data of  $^{32}\text{O}_2$  (top),  $^{34}\text{O}_2$  (middle), and  $^{36}\text{O}_2$  (bottom) evolved during the irradiation of a  $\text{H}_2^{18}\text{O}$  (10.8 at%  $^{18}\text{O}$ ) containing borate buffer (pH 8.5, 80 mM) solution with 100  $\mu\text{M}$  of **Co<sub>4</sub>O<sub>4</sub>-dpk** cubane, 1 mM  $[\text{Ru}(\text{bpy})_3]\text{Cl}_2$ , and 5 mM  $\text{Na}_2\text{S}_2\text{O}_8$ .

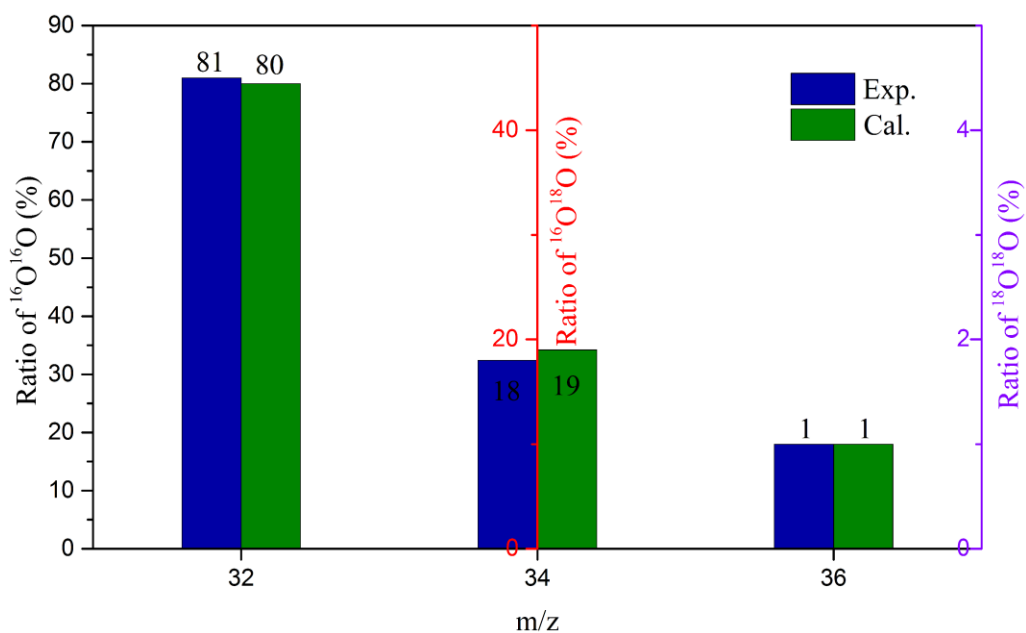

**Figure S36.** Experimental and theoretical ratios of  $^{16}\text{O}^{16}\text{O}$ ,  $^{16}\text{O}^{18}\text{O}$ , and  $^{18}\text{O}^{18}\text{O}$  evolved during the irradiation of a  $\text{H}_2^{18}\text{O}$  (10.8 at%  $^{18}\text{O}$ ) containing borate buffer (pH 8.5, 80 mM) solution with 100  $\mu\text{M}$  of **Co<sub>4</sub>O<sub>4</sub>-dpk** cubane, 1 mM  $[\text{Ru}(\text{bpy})_3]\text{Cl}_2$ , and 5 mM  $\text{Na}_2\text{S}_2\text{O}_8$ .

## Current research survey: Mixed Co/Ni-containing water oxidation catalysts

**Table S8.** Literature survey of mixed Co/Ni-containing water oxidation catalyst types (selection)

| Co/Ni-WOC<br>Test method                       | Type/ | Compound                                                   | Hypotheses for Co/Ni interactions                                                                                                                                     | Ref. |
|------------------------------------------------|-------|------------------------------------------------------------|-----------------------------------------------------------------------------------------------------------------------------------------------------------------------|------|
|                                                |       | Ni <sub>x</sub> Co <sub>3-x</sub> O <sub>4</sub> spinels   | Ni modulates electronic properties of active sites and thus modifies adsorption energies of intermediates                                                             | [1]  |
|                                                |       | Ni <sub>x</sub> Co <sub>3-x</sub> O <sub>4-y</sub>         | Nonstoichiometry together with low coordination metal sites both lower the HO <sup>•</sup> adsorption energy, while non-homogeneous surface further promotes activity | [2]  |
|                                                |       | Ni <sub>x</sub> Co <sub>1-x</sub> O                        | Reduction of the work function of (001) and (100) surfaces with increasing Co contents                                                                                | [3]  |
|                                                |       | Ni-Co LDH nanosheets                                       | Beneficial (tetrahedral) Ni <sup>3+</sup> surface enrichment facilitates formation of NiOOH active sites                                                              | [4]  |
|                                                |       | NiCo <sub>2</sub> O <sub>4</sub> nanowire arrays           | General promoting effect of highly exposed high-index facets of the nanowires                                                                                         | [5]  |
|                                                |       | Ni <sub>1+x</sub> Co <sub>2-x</sub> O <sub>4</sub> series  | Strong dependence of redox couples' site occupancies and resulting performances on the preparation method, irreversible Ni <sup>3+</sup> formation has to be avoided  | [6]  |
|                                                |       | <b>Preparative/morphological progress</b>                  |                                                                                                                                                                       |      |
|                                                |       | Ni <sub>x</sub> Co <sub>y</sub> O <sub>4</sub>             | Supported on Co/N decorated graphene as a composite                                                                                                                   | [7]  |
|                                                |       | NiCo-LDH                                                   | Nanosheet arrays grown on Ni foam                                                                                                                                     | [8]  |
|                                                |       | NiCo <sub>2</sub> O <sub>4</sub>                           | Nanowire OER component of Ni/Co OER/HER device                                                                                                                        | [9]  |
|                                                |       | NiCo <sub>2</sub> O <sub>4</sub>                           | Hollow-urchin morphologies, superior over nanoparticles                                                                                                               | [10] |
|                                                |       | Ni <sub>x</sub> Co <sub>3-x</sub> O <sub>4</sub> nanowires | Conversion into NiCo/NiCoO <sub>x</sub> HER catalysts for overall water splitting devices                                                                             | [11] |
|                                                |       | Ni-rich Ni-Co oxide layers                                 | Nanoporous materials through anodization                                                                                                                              | [12] |
|                                                |       | CoNi hydroxide nanosheets                                  | Deposition on Ni foam equipped with stabilizing Ni nanocones                                                                                                          | [13] |
| <b>Heterogeneous/<br/>Photoelectrochemical</b> |       | NiCoO <sub>x</sub> film (co-sputtered)                     | Lower resistance, enhanced chemisorption properties                                                                                                                   | [14] |
| <b>Heterogeneous/<br/>Theoretical studies</b>  |       | β-NiOOH with Co                                            | Optimized binding energies of intermediates on all sites reduce overpotential of water oxidation                                                                      | [15] |
| <b>Heterogeneous/<br/>Chemical oxidation</b>   |       | No records found to date                                   |                                                                                                                                                                       |      |
| <b>Molecular/<br/>Electrochemical</b>          |       | No records found to date                                   |                                                                                                                                                                       |      |
| <b>Molecular/<br/>Photochemical</b>            |       | No records found to date                                   |                                                                                                                                                                       |      |
| <b>Molecular/<br/>Chemical oxidation</b>       |       | No records found to date                                   |                                                                                                                                                                       |      |

Table S8 provides a preliminary overview of reports on mixed Co/Ni-oxide based water oxidation catalysts based on literature research. Although this short survey is far from complete, it clearly demonstrates that the majority of Co/Ni-oxide WOCs have been assessed with electrochemical methods. Mostly, they outperformed their binary counterparts in electrochemical water oxidation. In sharp contrast, no reports on molecular Co/Ni-WOCs were found in different databases to date (within a reasonable search time interval).

This trend impressively highlights the significant dependence of the performance assessment on the applied oxidation method, as has been pointed out in recent fundamental studies.<sup>16</sup> Surprisingly, almost no data are available for the corresponding photochemical water oxidation performance of the excellent Co/Ni electrocatalysts listed above. Moreover, molecular Co/Ni-WOCs appear to remain rather unexplored to date.

Among the growing number of studies on electrochemical water oxidation with Co/Ni-containing oxide WOCs (further non-oxide Co/Ni-systems have been omitted for the sake of brevity in Table S8), the interpretation of the observed Co-Ni synergisms remains somewhat controversial. Most hypotheses are focused on improved general surface properties<sup>3</sup> and on the enhancement of active sites with respect to favorable intermediate adsorption energies.<sup>1,2</sup> Although theoretical studies support these hypotheses, they also demonstrate that modeling results may depend on the selected surface unit cell size.<sup>15</sup>

All in all, most Co/Ni synergism models for solid state electrochemical WOCs emphasize statistical surface and bulk-related effects (such as enhanced conductivity). To the best of our knowledge, no investigations of Co/Ni interaction on the molecular level have been performed that are comparable to such benchmark studies on Co<sub>3</sub>O<sub>4</sub>.<sup>17</sup> This renders new molecular heterometallic Co/Ni-WOCs indispensable targets to understand important performance/mechanistic discrepancies between different catalyst and assay types. The present {Co<sub>x</sub>Ni<sub>4-x</sub>O<sub>4</sub>} cubanes offer the unique opportunity to study mixed edge-site motifs within a confined and well-defined ligand environment.

All in all, the following questions of general interest emerge from the present state-of-the-art for Co/Ni-WOCs:

- (1) Do their electro- and (photo)chemical pathways differ fundamentally?
- (2) Do molecular and heterogeneous compounds display different oxygen evolution mechanisms?
- (3) Most important conclusion from (1) & (2):

What are the consequences for the unification of molecular and heterogeneous WOC design concepts?

- (1) Abidat, I.; Morais, C.; Comminges, C.; Canaff, C.; Rousseau, J.; Guignard, N.; Napporn, T. W.; Habrioux, A.; Kokoh, K. B. *J. Mater. Chem. A* **2017**, 5, 7173–7183.
- (2) Antony, R. P.; Satpati, A. K.; Bhattacharyya, K.; Jagatap, B. N. *Adv. Mater. Interfaces* **2016**, 3, 1600632.
- (3) Fominykh, K.; Tok, G. C.; Zeller, P.; Hajiyani, H.; Miller, T.; Döblinger, M.; Pentcheva, R.; Bein, T.; Fattakhova-Rohlfing, D. *Adv. Funct. Mater.* **2017**, 27, 1605121.
- (4) Wang, H.-Y.; Hsu, Y.-Y.; Chen, R.; Chan, T.-S.; Chen, H. M.; Liu, B. *Adv. Energy Mater.* **2015**, 5, 1500091.
- (5) Yu, X.; Sun, Z.; Yan, Z.; Xiang, B.; Liu, X.; Du, P. *J. Mater. Chem. A* **2014**, 2, 20823–20831.
- (6) Chanda, D.; Hnát, J.; Bystron, T.; Paidar, M.; Bouzek, K. *J. Power Sources* **2017**, 347, 247–258.
- (7) Hao, Y.; Xu, Y.; Liu, J.; Sun, X. *J. Mater. Chem. A* **2017**, 5, 5594–5600.
- (8) Jiang, J.; Zhang, A.; Li, L.; Ai, L. *J. Power Sources* **2015**, 278, 445–451.
- (9) Peng, Z.; Jia, D.; Al-Enizi, A. M.; Elzatahry, A. A.; Zheng, G. *Adv. Energy Mater.* **2015**, 5, 1402031.
- (10) Wang, J.; Qiu, T.; Chen, X.; Lu, Y.; Yang, W. *J. Power Sources* **2014**, 268, 341–348.
- (11) Yan, X.; Li, K.; Lyu, L.; Song, F.; He, J.; Niu, D.; Liu, L.; Hu, X.; Chen, X. *ACS Appl. Mater. Interf.* **2016**, 8, 3208–3214.
- (12) Yang, Y.; Fei, H.; Ruan, G.; Xiang, C.; Tour, J. M. *ACS Nano* **2014**, 8, 9518–9523.
- (13) Yoon, S.; Yun, J.-Y.; Lim, J.-H.; Yoo, B. *J. Alloys Comp.* **2017**, 693, 964–969.
- (14) Bae, D.; Mei, B.; Frydendal, R.; Pedersen, T.; Seger, B.; Hansen, O.; Vesborg, P. C. K.; Chorkendorff, I. *ChemElectroChem* **2016**, 3, 1546–1552.
- (15) Costanzo, F. *Phys. Chem. Chem. Phys.* **2016**, 18, 7490–7501.
- (16) Pokhrel, R.; Goetz, M. K.; Shaner, S. E.; Wu, X.; Stahl, S. S. *J. Am. Chem. Soc.* **2015**, 137, 8384–8387.
- (17) Zhang, M.; Respinis, M. de; Frei, H. *Nature Chem.* **2014**, 6, 362–367.

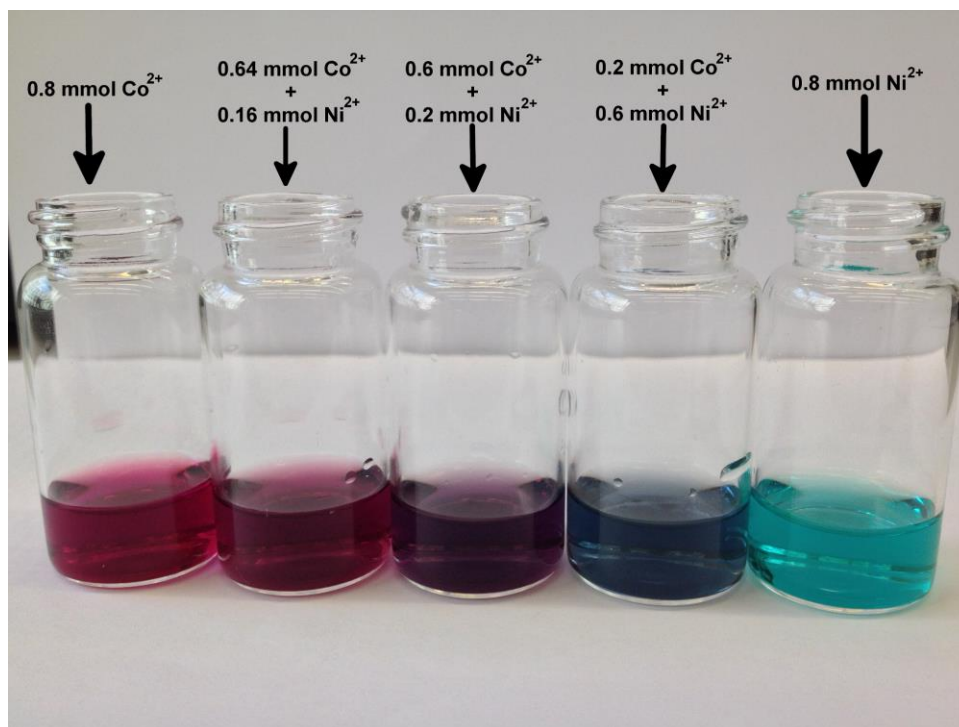

**Figure S37.** Synthetic solutions of **Co<sub>4</sub>O<sub>4</sub>-dpk**, **Co<sub>x</sub>Ni<sub>4-x</sub>O<sub>4</sub>-dpk** series, and **Ni<sub>4</sub>O<sub>4</sub>-dpk** (left to right).

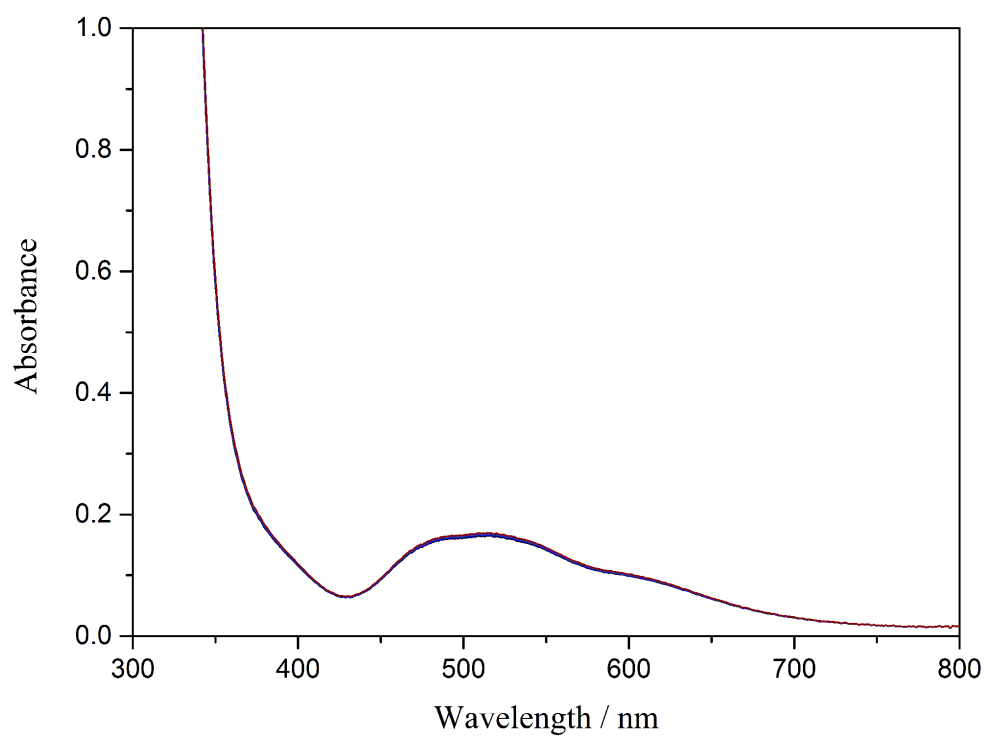

**Figure S38.** Time dependent UV/vis spectra of 1.5 mM **Co<sub>2.65</sub>Ni<sub>1.35</sub>O<sub>4</sub>-dpk** cubane in pH 8.5, 80 mM borate buffer solution over 2 h.

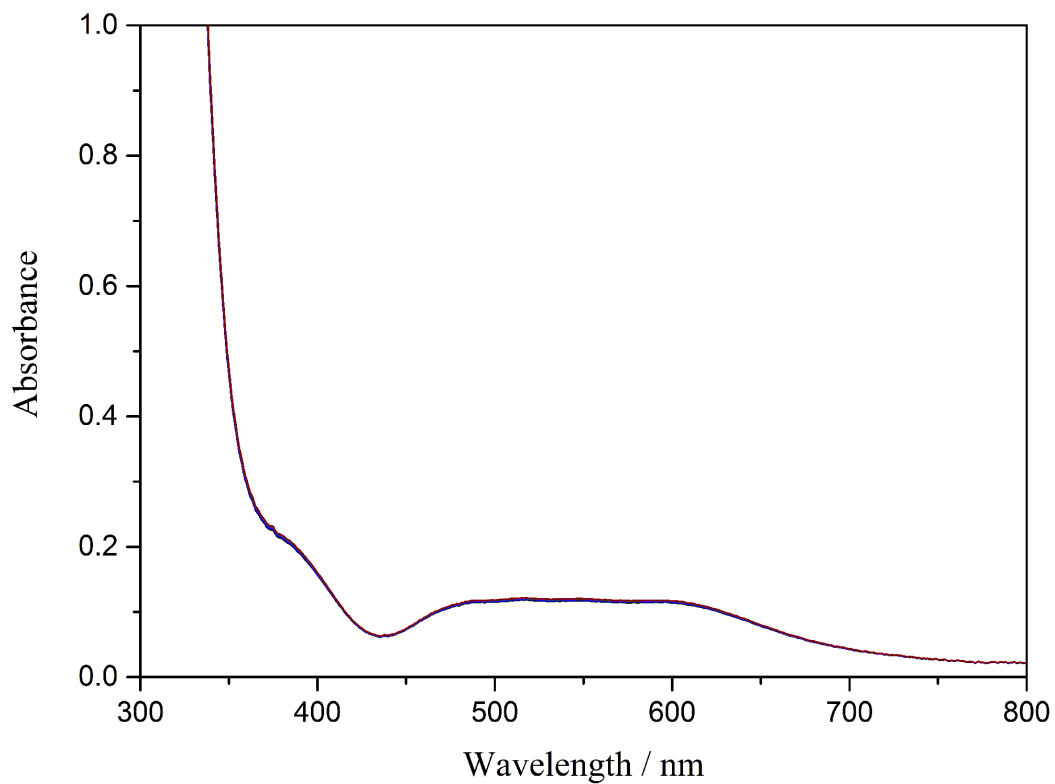

**Figure S39.** Time dependent UV/vis spectra of 1.5 mM  $\text{Co}_{2.05}\text{Ni}_{1.95}\text{O}_4\text{-dpk}$  cubane in pH 8.5, 80 mM borate buffer solution over 2 h.

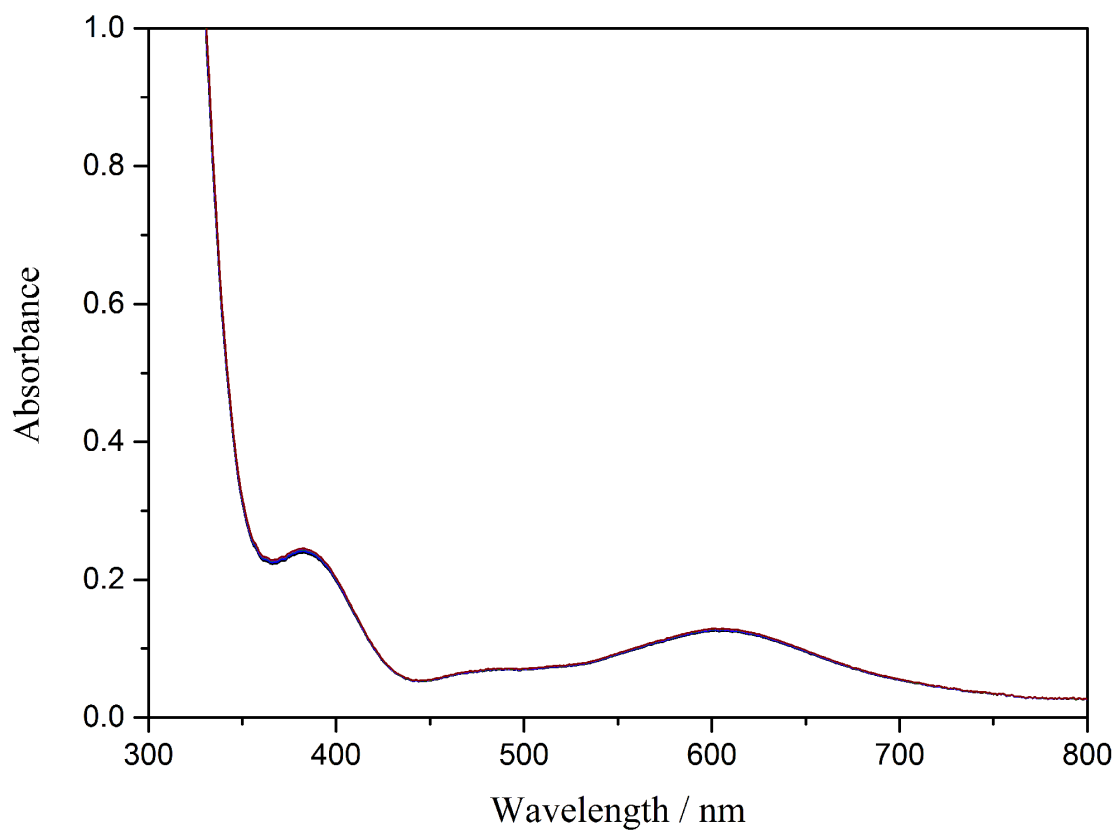

**Figure S40.** Time dependent UV/vis spectra of 1.5 mM  $\text{Co}_{1.15}\text{Ni}_{2.85}\text{O}_4\text{-dpk}$  cubane in pH 8.5, 80 mM borate buffer solution over 2 h.



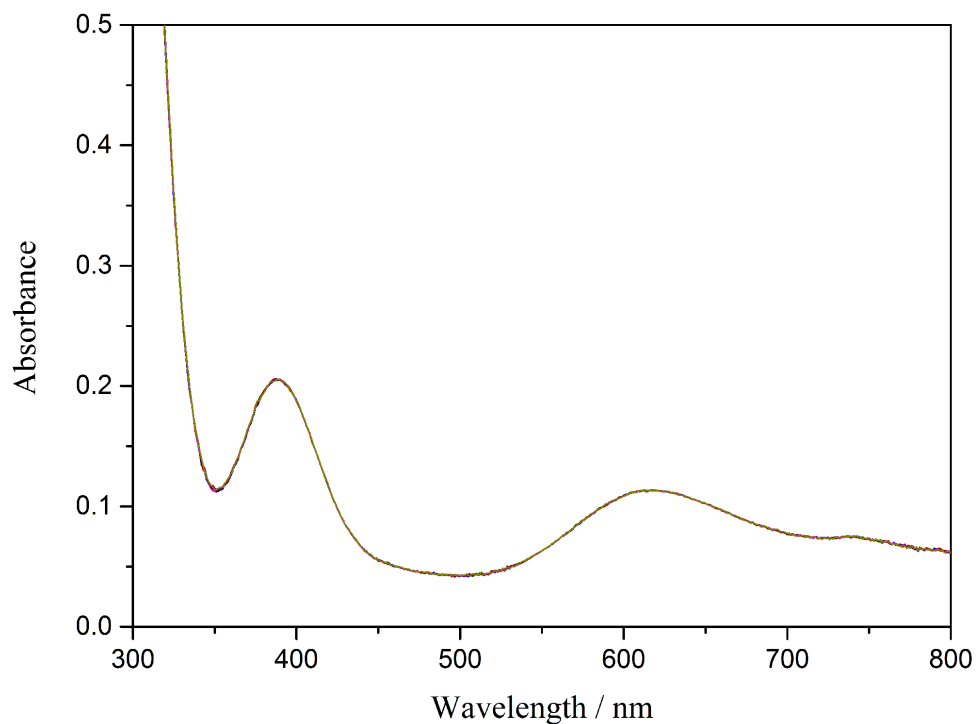

**Figure S41.** Time dependent UV/vis spectra of 3.0 mM  $\text{Ni}_4\text{O}_4\text{-dpk}$  cubane in pH 8.5, 80 mM borate buffer solution over 2 h.

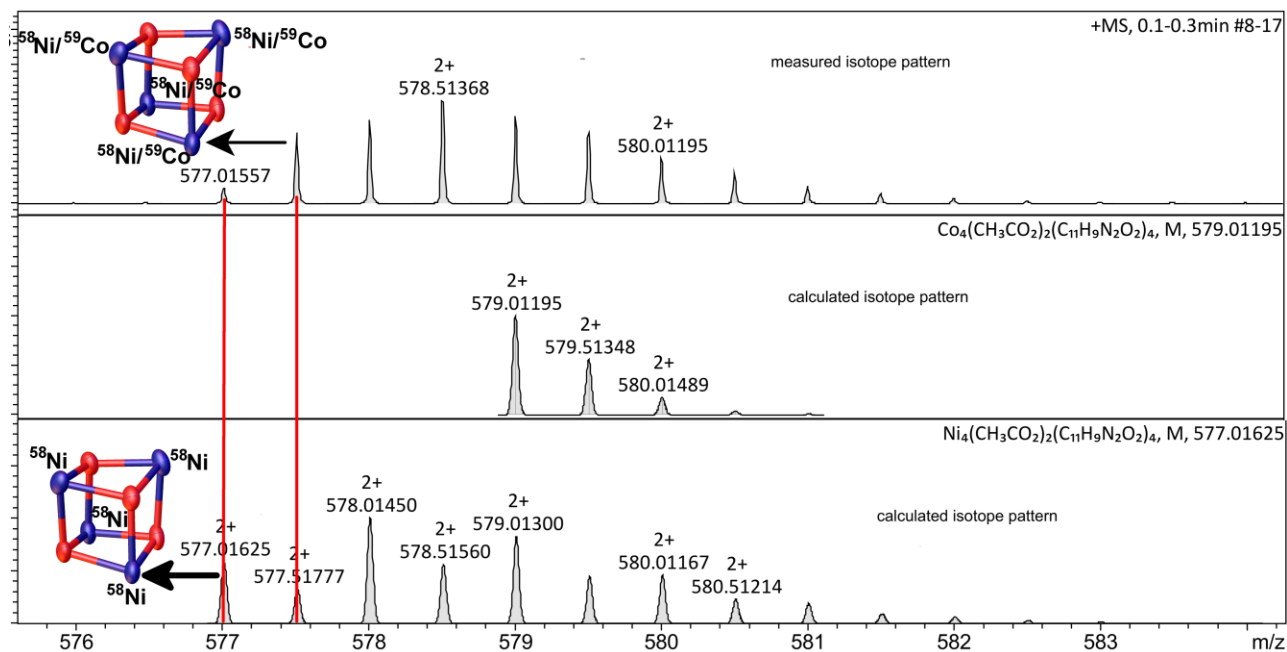

**Figure S42.** HR-ESI-MS spectra comparison of  $\text{Co}_4\text{O}_4\text{-dpk}$ ,  $\text{Ni}_4\text{O}_4\text{-dpk}$ , and  $\text{Co}_{1.15}\text{Ni}_{2.85}\text{O}_4\text{-dpk}$  in the  $m/z$  range of 576-583.

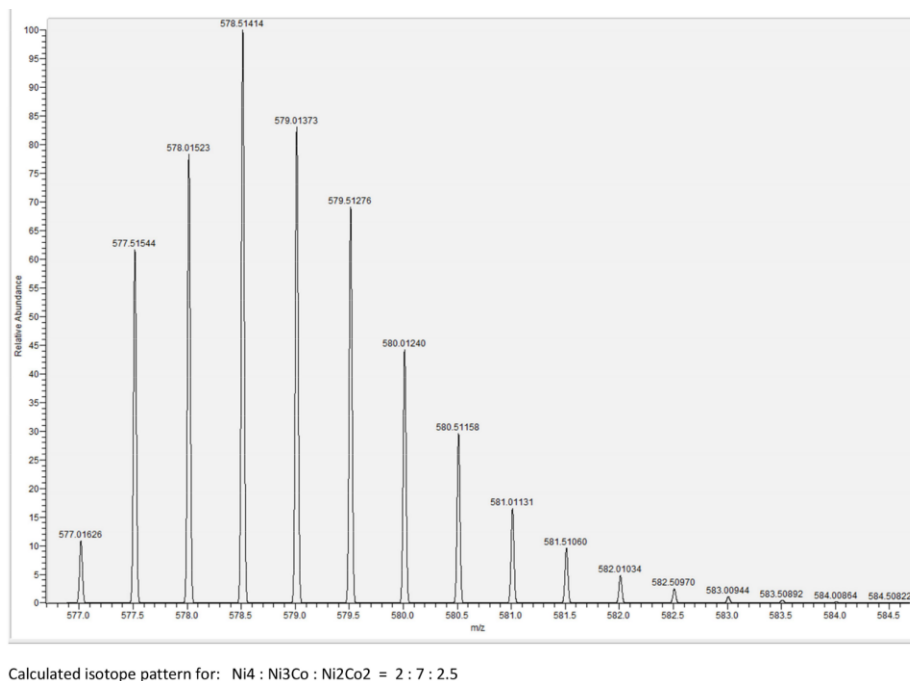

**Figure S43.** Calculated MS spectrum of **Co<sub>1.15</sub>Ni<sub>2.85</sub>O<sub>4</sub>-dpk** in the  $m/z$  range of 577.0-584.5.

**Table S9.** Photocatalytic water oxidation performance of 100  $\mu\text{M}$  of **Co<sub>4</sub>O<sub>4</sub>-dpk** and of the **Co<sub>x</sub>Ni<sub>4-x</sub>O<sub>4</sub>-dpk** series in pH 8.5 borate buffer solution (80 mM).

| Catalyst                                                   | O <sub>2</sub> area | N <sub>2</sub> area | O <sub>2</sub> /μmol | <sup>a</sup> O <sub>2</sub> yield | <sup>b</sup> TON | <sup>c</sup> TOF / s <sup>-1</sup> |
|------------------------------------------------------------|---------------------|---------------------|----------------------|-----------------------------------|------------------|------------------------------------|
| <b>Co<sub>4</sub>O<sub>4</sub>-dpk</b>                     | 1488.8              | 55.4                | 16.0                 | 80%                               | 20.0             | 0.24                               |
| <b>Co<sub>2.80</sub>Ni<sub>1.20</sub>O<sub>4</sub>-dpk</b> | 1185.4              | 32.3                | 12.8                 | 64%                               | 16.0             | 0.21                               |
| <b>Co<sub>2.65</sub>Ni<sub>1.35</sub>O<sub>4</sub>-dpk</b> | 1182.2              | 26.2                | 12.8                 | 64%                               | 16.0             | 0.21                               |
| <b>Co<sub>2.05</sub>Ni<sub>1.95</sub>O<sub>4</sub>-dpk</b> | 782.4               | 9.9                 | 8.6                  | 43%                               | 10.8             | 0.14                               |
| <b>Co<sub>1.15</sub>Ni<sub>2.85</sub>O<sub>4</sub>-dpk</b> | 502.8               | 15.1                | 5.5                  | 28%                               | 6.9              | 0.10                               |

<sup>a</sup>O<sub>2</sub> yield = 2 × mole of O<sub>2</sub> (GC)/mole of Na<sub>2</sub>S<sub>2</sub>O<sub>8</sub>. <sup>b</sup>TON = mole of O<sub>2</sub> (GC)/mole of catalyst. <sup>c</sup>TOF<sub>initial</sub> = initial concentration of O<sub>2</sub> evolution (Clark electrode kinetics in 60 s)/catalyst concentration. Conditions: 470 nm LED; 100  $\mu\text{M}$  of **Co<sub>4</sub>O<sub>4</sub>-dpk**; 1 mM [Ru(bpy)<sub>3</sub>]Cl<sub>2</sub>; 5 mM Na<sub>2</sub>S<sub>2</sub>O<sub>8</sub>; standard deviation of molar O<sub>2</sub> yields: ca. 3%.

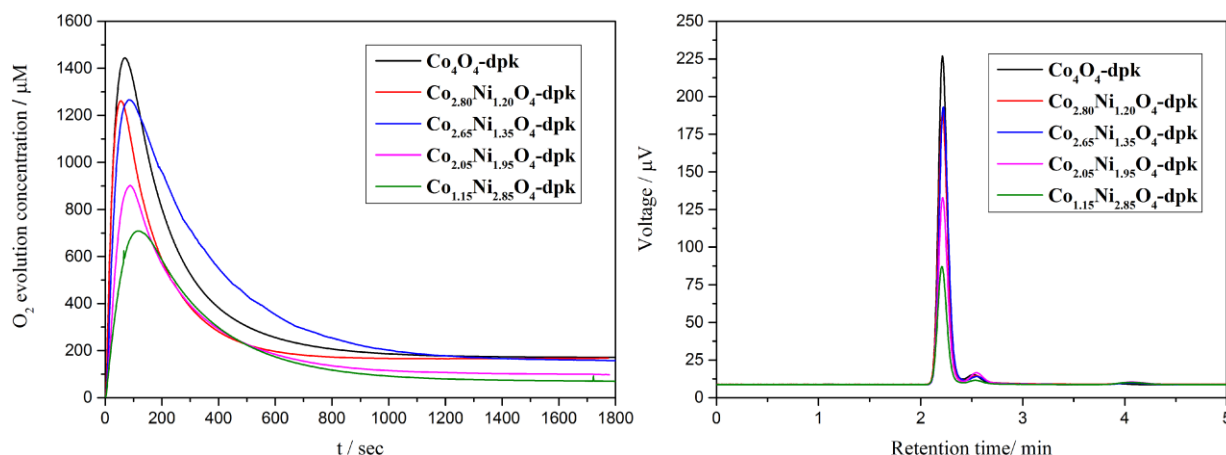

**Figure S44.** Clark electrode kinetics (a) and GC measurement (b) of visible light-driven water oxidation catalyzed by 100  $\mu\text{M}$  **Co<sub>4</sub>O<sub>4</sub>-dpk** (black) and the **Co<sub>x</sub>Ni<sub>4-x</sub>O<sub>4</sub>-dpk** series (conditions: 470 nm LED; 1 mM [Ru(bpy)<sub>3</sub>]Cl<sub>2</sub>; 5 mM Na<sub>2</sub>S<sub>2</sub>O<sub>8</sub>; pH 8.5, 80 mM borate buffer), respectively.

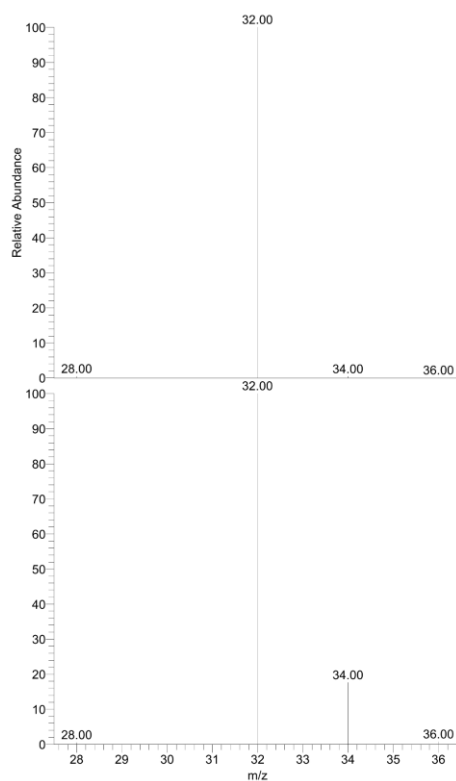

**Figure S45.** Electron impact ionization mass spectra of the gas sample evolved during the irradiation of  $\text{H}_2^{16}\text{O}$  (top) and  $\text{H}_2^{18}\text{O}$  (8.3 at%  $^{18}\text{O}$ ) (bottom) containing borate buffer solutions (pH 8.5, 80 mM) with 100  $\mu\text{M}$  of **Co<sub>2.65</sub>Ni<sub>1.35</sub>O<sub>4</sub>-dpk** cubane, 1 mM  $[\text{Ru}(\text{bpy})_3]\text{Cl}_2$ , and 5 mM  $\text{Na}_2\text{S}_2\text{O}_8$ .

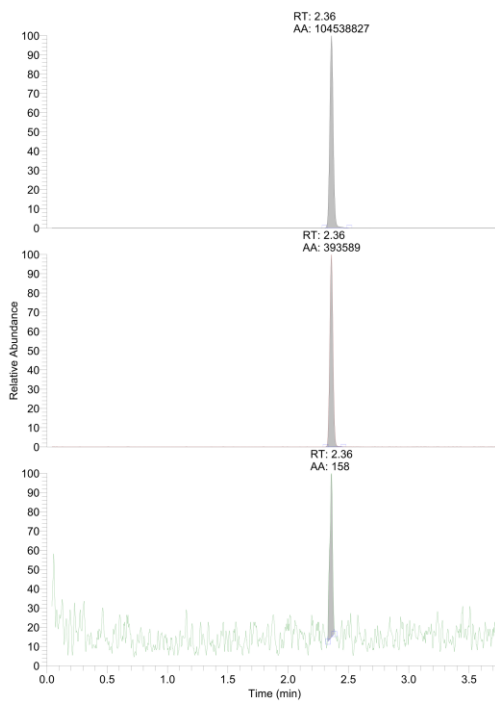

**Figure S46.** GC data of  $^{32}\text{O}_2$  (top),  $^{34}\text{O}_2$  (middle), and  $^{36}\text{O}_2$  (bottom) evolved during the irradiation of a  $\text{H}_2^{16}\text{O}$  containing borate buffer (pH 8.5, 80 mM) solution with 100  $\mu\text{M}$  of **Co<sub>2.65</sub>Ni<sub>1.35</sub>O<sub>4</sub>-dpk** cubane, 1 mM  $[\text{Ru}(\text{bpy})_3]\text{Cl}_2$ , and 5 mM  $\text{Na}_2\text{S}_2\text{O}_8$ .

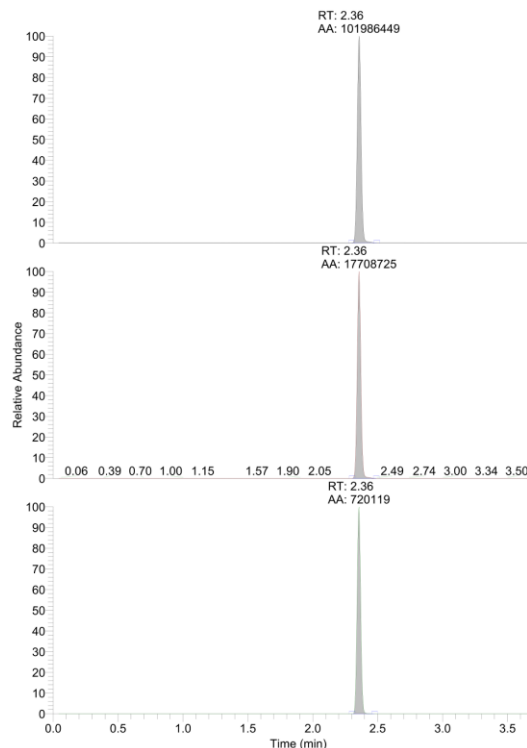

**Figure S47.** GC data of  $^{32}\text{O}_2$  (top),  $^{34}\text{O}_2$  (middle), and  $^{36}\text{O}_2$  (bottom) evolved during the irradiation of a  $\text{H}_2^{18}\text{O}$  (8.3 at%  $^{18}\text{O}$ ) containing borate buffer (pH 8.5, 80 mM) solution with 100  $\mu\text{M}$  of  $\text{Co}_{2.65}\text{Ni}_{1.35}\text{O}_4\text{-dpk}$  cubane, 1 mM  $[\text{Ru}(\text{bpy})_3]\text{Cl}_2$ , and 5 mM  $\text{Na}_2\text{S}_2\text{O}_8$ .

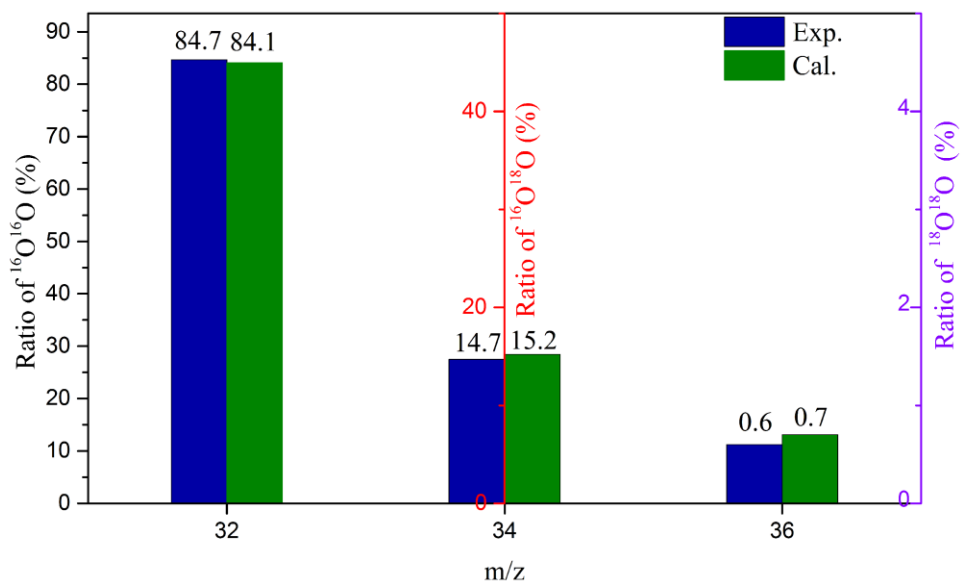

**Figure S48.** Experimental and theoretical ratios of  $^{16}\text{O}^{16}\text{O}$ ,  $^{16}\text{O}^{18}\text{O}$ , and  $^{18}\text{O}^{18}\text{O}$  evolved during the irradiation of a  $\text{H}_2^{18}\text{O}$  (8.3 at%  $^{18}\text{O}$ ) containing borate buffer (pH 8.5, 80 mM) solution containing 100  $\mu\text{M}$  of  $\text{Co}_{2.65}\text{Ni}_{1.35}\text{O}_4\text{-dpk}$  cubane, 1 mM  $[\text{Ru}(\text{bpy})_3]\text{Cl}_2$ , and 5 mM  $\text{Na}_2\text{S}_2\text{O}_8$ .

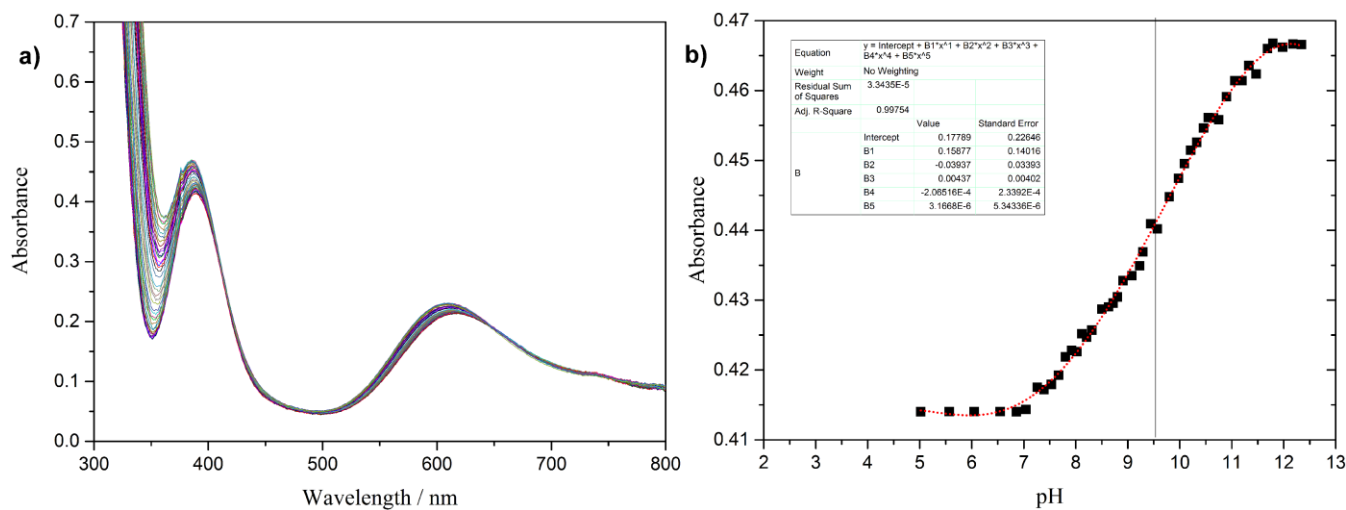

**Figure S49.** (a) pH dependent UV/vis spectra of 7 mM of  $\text{Ni}_4\text{O}_4\text{-dpk}$  cubane; (b) representative plot of the absorbance at 389 nm vs. pH.

## Computational Settings

Density functional theory-based molecular dynamics (DFT-MD) simulations were performed using the QUICKSTEP program<sup>1</sup> as implemented in the CP2K package,<sup>2</sup> which uses a mixed Gaussian and plane wave scheme with the wave functions expanded in terms of a Gaussian basis set and the charge density represented via an auxiliary plane wave basis. The computational model contained the cubane (**Co<sub>4</sub>O<sub>4</sub>-dpk**) (or a deprotonated variant thereof) and 208 and 452 water molecules, respectively, in a periodic cubic box, and was first run in the NPT ensemble where the temperature of the system was stepwise increased from 50 K to 300 K. Furthermore, the behavior of the pressure was monitored by changing the box size in the NVT ensemble at 300 K. With the final box size of 18.7340<sup>3</sup> Å<sup>3</sup> for the small system and 24.180<sup>3</sup> Å<sup>3</sup> for the large one, we equilibrated all systems for 10-15 ps in the NVT ensemble using a time step of 0.5 fs. The temperature was held close to 300 K using CSV thermostat (canonical sampling through velocity rescaling)<sup>3</sup> with a time constant of 10 fs. For the production runs, we used the NVT ensemble and the CSV thermostat with a time constant of 50 fs and sampled for additional 20 ps using a time step of 0.5 fs. The introduction of a negative background charge allowed us to neutralize the otherwise charged system. While the background charge is an artificial feature, it is known to introduce less bias than explicit counter ions in the infinite dilution limit.<sup>4</sup> We assumed a high spin configuration as well as ferromagnetic coupling for all four cobalt centers. Unless otherwise stated, the generalized gradient approximation (GGA) exchange-correlation (XC) functional Perdew-Burke-Ernzerhof (PBE)<sup>5</sup> was used. We employed the DZVP-MOLOPT-GTH basis sets,<sup>6</sup> a 500 Ry cutoff for the auxiliary plane wave expansion of the charge density, and the Goedecker-Teter-Hutter (GTH)<sup>7,8</sup> norm-conserving pseudopotentials to represent the core electrons. Kohn-Sham and overlap matrix elements smaller than  $\epsilon_{\text{default}} = 10^{-12}$  were neglected, and the convergence criterion for the electronic gradient (largest element of the gradient) was set to  $\epsilon_{\text{SCF}} = 1 \cdot 10^{-6}$  (small system) and  $\epsilon_{\text{SCF}} = 5 \cdot 10^{-6}$  (large system). In addition we applied the D3 dispersion correction by Grimme et al.<sup>9</sup> to correct for the overstructuring of water observed with GGA-XC functionals. For the production runs described above, a drift in the total energy of 10<sup>-5</sup> a.u./ps/atom was found. Comparing the two different system sizes, we found that the additional water layers did not significantly change the behavior of the cubane (see Table S8). In order to save computational resources, we performed longer equilibration runs (> 10 ps) only for the smaller system.

**Table S10.** Description of the oxygen-oxygen radial distribution function  $g_{\text{OO}}(r)$  in terms of position (in Å) of the first maximum ( $r_1^{\text{max}}$ ), the first minimum ( $r_1^{\text{min}}$ ), and the second maximum ( $r_2^{\text{max}}$ ) for the neutral cubane (**Co<sub>4</sub>O<sub>4</sub>-dpk**), compared to reference calculations of a box containing 64 water molecules using the PBE functional as well as a self-consistent (SC) dispersion correction based on Tkatchenko-Scheffler (TS-vdW) density dependent van der Waals/dispersion functional.<sup>10</sup>

|                                                      | $T$ (K) | $r_1^{\text{max}}$ | $r_1^{\text{min}}$ | $r_2^{\text{max}}$ |
|------------------------------------------------------|---------|--------------------|--------------------|--------------------|
| PBE-D3 (452 solvent water molecules)                 | 300     | 2.75               | 3.25               | 4.35               |
| PBE-D3 (208 solvent water molecules)                 | 300     | 2.75               | 3.17               | 4.18               |
| PBE <sub>(bulk water)</sub> <sup>11</sup>            | 300     | 2.69               | 3.28               | 4.44               |
| PBE-TS-vdW(SC) <sub>(bulk water)</sub> <sup>11</sup> | 300     | 2.71               | 3.27               | 4.40               |
| Experiment <sup>12</sup>                             | 295     | 2.80               | 3.45               | 4.50               |
| Experiment <sup>13</sup>                             | 295     | 2.76               | 3.42               | 4.43               |

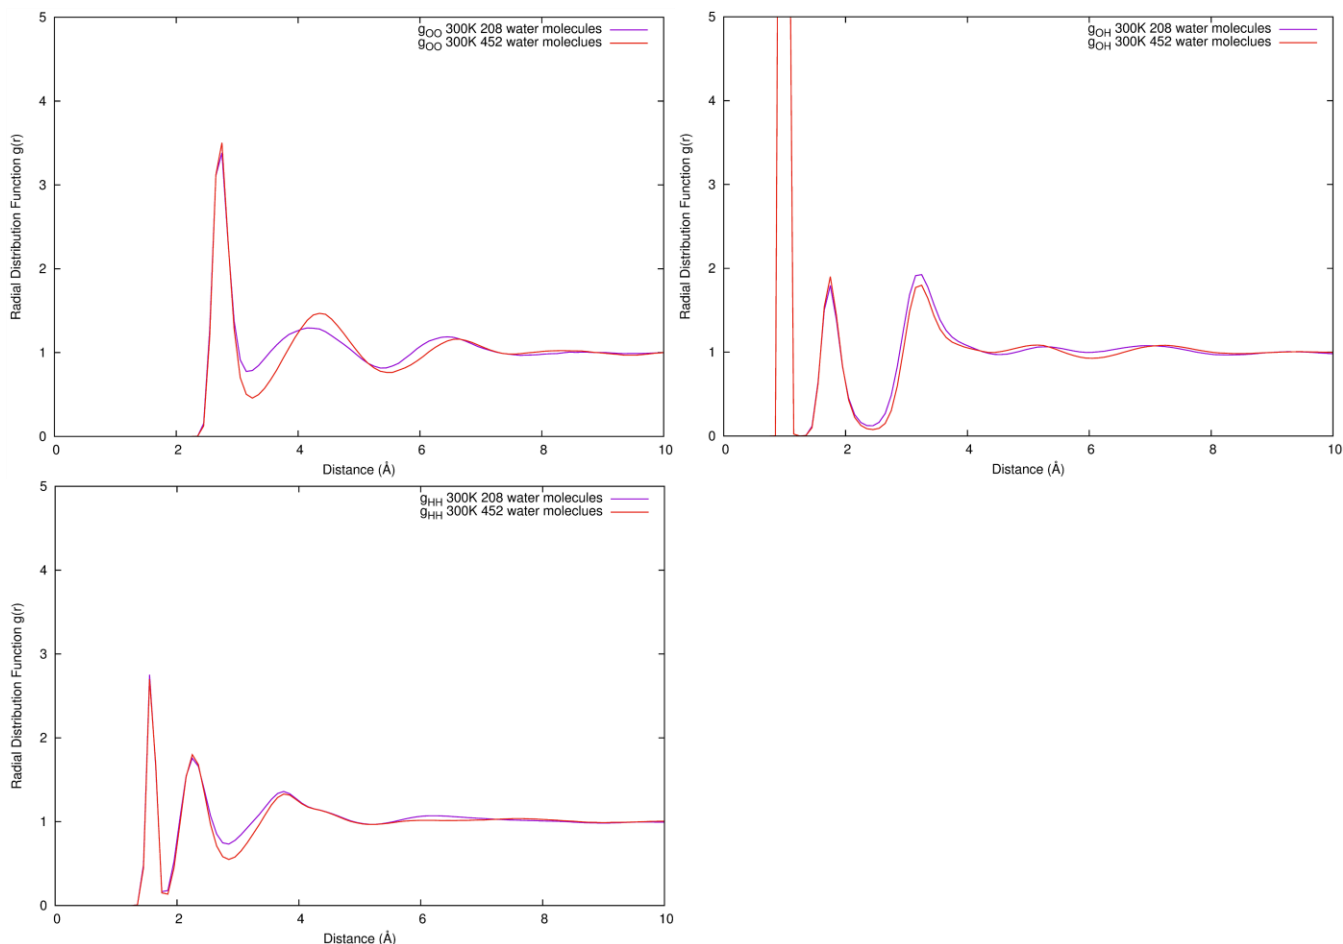

**Figure S50.** Radial distribution function (RDF) of the solvent water molecules in the simulation box of the neutral cubane.

**Table S11.** Different functionals (BP86,<sup>14, 15</sup> PBE,<sup>5</sup> TPSS,<sup>16</sup> BLYP<sup>14, 17</sup>) and dispersion correction models such as Grimme's D3,<sup>9</sup> D3\_c9 (three-body-terms<sup>9</sup>) and the non-local correction rvv10<sup>18</sup> were used to optimize the structure of the cubane (**Co<sub>4</sub>O<sub>4</sub>-dpk**) *in vacuo*. Co-Co distances given in Å in Table S11 were compared with the experimental values from single crystal X-ray structure determination (Table S2). The best agreement with experimental data was found for PBE-D3 where deviations from the experiment were always smaller than 0.1 Å.

| Bond      | BP86-D3 | PBE-D3 | PBE-rvv10 | PBE-D3_c9 | TPSS-D3 | BLYP-D3 | Exp. |
|-----------|---------|--------|-----------|-----------|---------|---------|------|
| Co1-Co1a  | 3.27    | 3.21   | 3.27      | 3.28      | 3.19    | 3.29    | 3.16 |
| Co1-Co2   | 3.27    | 3.24   | 3.27      | 3.28      | 3.19    | 3.30    | 3.21 |
| Co1-Co2a  | 3.33    | 3.30   | 3.33      | 3.35      | 3.30    | 3.40    | 3.30 |
| Co1a-Co2  | 3.36    | 3.32   | 3.36      | 3.33      | 3.26    | 3.38    | 3.30 |
| Co1a-Co2a | 3.17    | 3.14   | 3.17      | 3.17      | 3.11    | 3.24    | 3.21 |
| Co2-Co2a  | 3.15    | 3.11   | 3.13      | 3.18      | 3.20    | 3.19    | 3.07 |

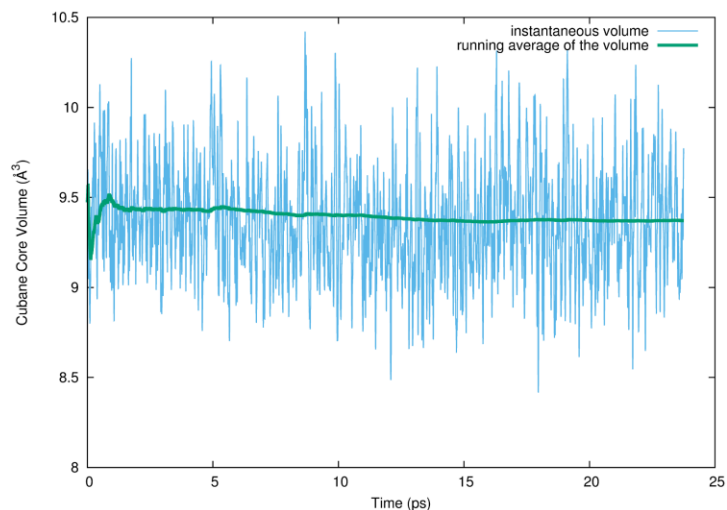

**Figure S51.** Evolution of volume enclosed by the cubane cage of **Co<sub>4</sub>O<sub>4</sub>-dpk** during the DFT-MD run including 208 solvent water molecules.

- (1) VandeVondele, J.; Krack, M.; Mohamed, F.; Parrinello, M.; Chassaing, T.; Hutter, J. *Comput. Phys. Comm.* **2005**, *167*, 103.
- (2) CP2K Development Group.
- (3) Bussi, G.; Donadio, D.; Parrinello, M. *J. Chem. Phys.* **2007**, *126*, 14101.
- (4) Blumberger, J.; Bernasconi, L.; Tavernelli, I.; Vuilleumier, R.; Sprik, M. *J. Am. Chem. Soc.* **2004**, *126*, 3928.
- (5) Perdew, J. P.; Ernzerhof, M.; Burke, K. *J. Chem. Phys.* **1996**, *105*, 9982.
- (6) VandeVondele, J.; Hutter, J. *J. Chem. Phys.* **2007**, *127*, 114105.
- (7) Hartwigsen, C.; Goedecker, S.; Hutter, J. *Phys. Rev. B* **1998**, *58*, 3641.
- (8) Goedecker, S.; Teter, M.; Hutter, J. *Phys. Rev. B* **1996**, *54*, 1703.
- (9) Grimme, S.; Antony, J.; Ehrlich, S.; Krieg, H. *J. Chem. Phys.* **2010**, *132*, 154104.
- (10) Tkatchenko, A.; Scheffler, M. *Phys. Rev. Lett.* **2009**, *102*, 73005.
- (11) DiStasio, R. A., JR; Santra, B.; Li, Z.; Wu, X.; Car, R. *J. Chem. Phys.* **2014**, *141*, 84502.
- (12) Skinner, L. B.; Huang, C.; Schlesinger, D.; Pettersson, L. G. M.; Nilsson, A.; Benmore, C. J. *J. Chem. Phys.* **2013**, *138*, 74506.
- (13) Soper, A. K.; Benmore, C. J. *Phys. Rev. Lett.* **2008**, *101*, 65502.
- (14) Becke, A. D. *Phys. Rev. A* **1988**, *38*, 3098.
- (15) Perdew, J. P. *Phys. Rev. B* **1986**, *33*, 8822.
- (16) Tao, J.; Perdew, J. P.; Staroverov, V. N.; Scuseria, G. E. *Phys. Rev. Lett.* **2003**, *91*, 146401.
- (17) Chengteh Lee; Weitao Yang; and Robert G. Parr. *Phys. Rev. B* **1988**, *37*, 785.
- (18) Sabatini, R.; Gorni, T.; Gironcoli, S. de. *Phys. Rev. B* **2013**, *87*, 041108.



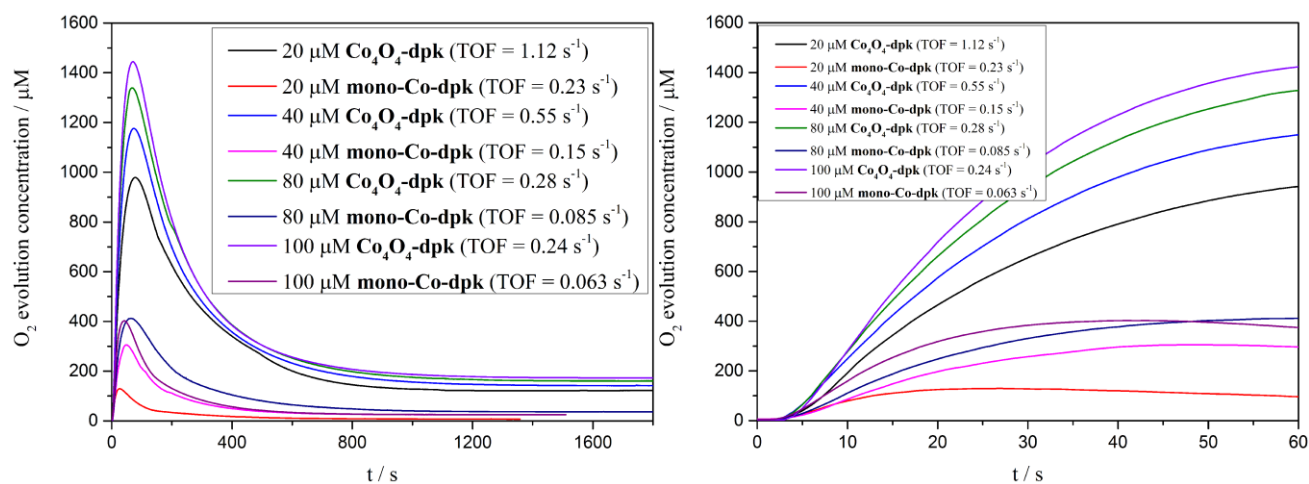

**Figure S52.** Clark electrode kinetics of visible light-driven water oxidation catalyzed by 20, 40, 80, and 100 μM Co<sub>4</sub>O<sub>4</sub>-dpk and mono-Co-dpk, respectively. TOF calculations of 20, 40, and 80, and 100 μM WOC catalyzed water oxidation are based on time intervals of 27, 49, and 60 s, respectively.

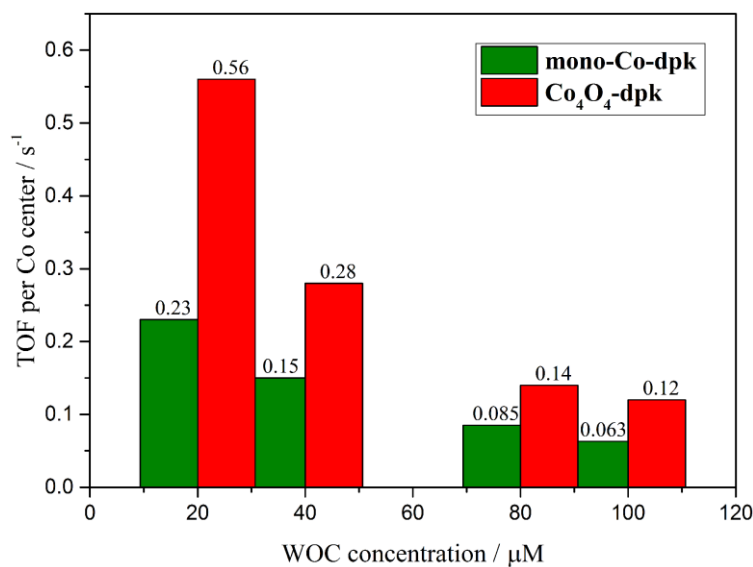

**Figure S53.** TOF per Co center of the above water oxidation kinetics with 20, 40, 80, and 100 μM WOC, respectively (calculation of TOF per Co center of Co<sub>4</sub>O<sub>4</sub>-dpk based on the edge-site).

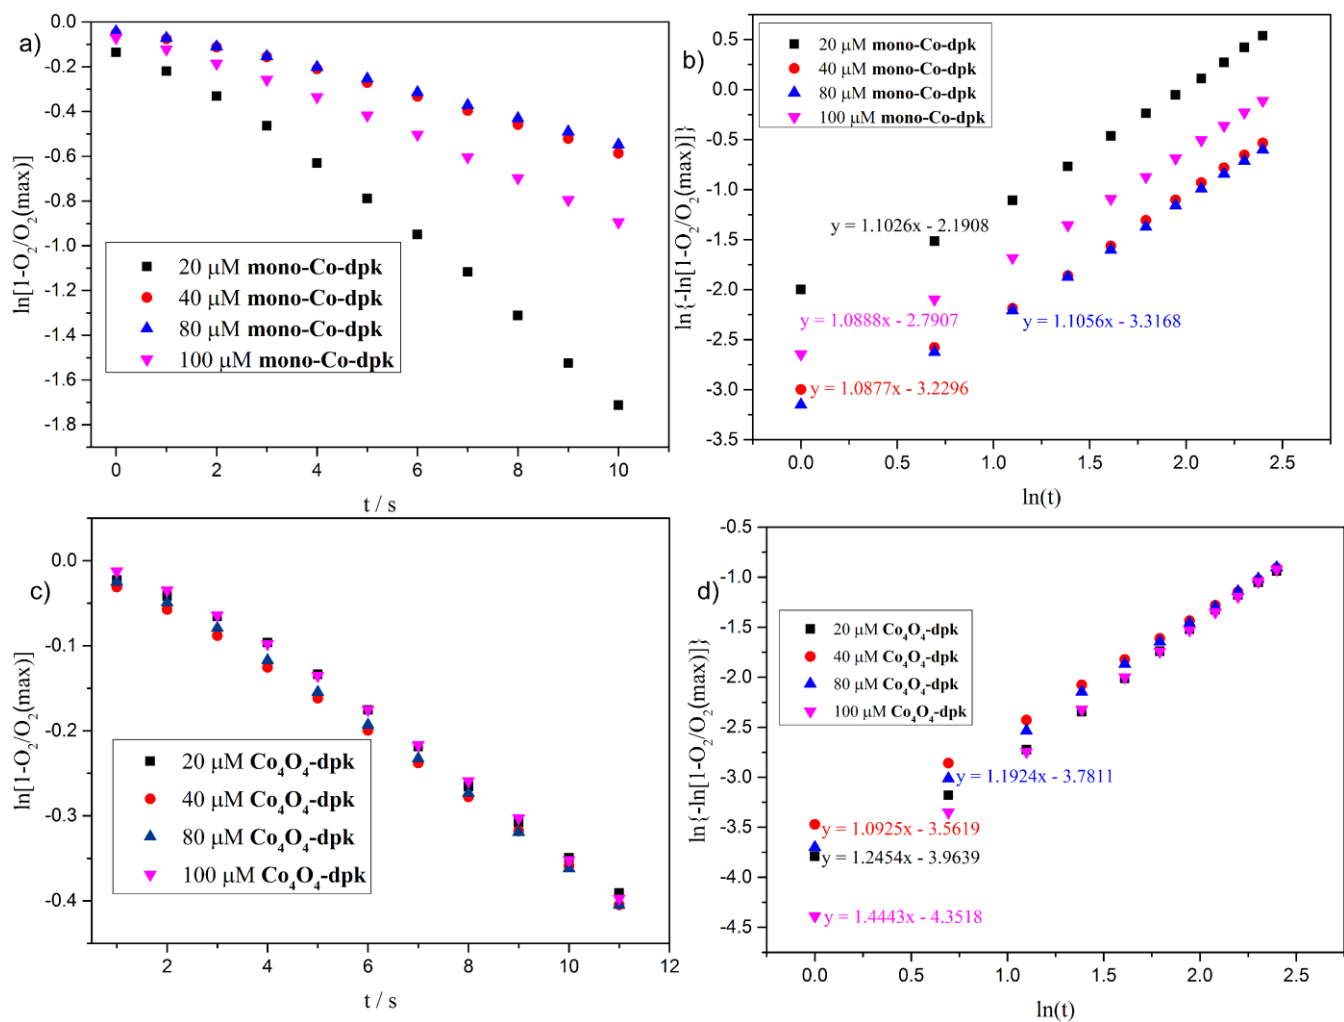

**Figure S54.** Tentative evaluation of mono-Co<sub>4</sub>O<sub>4</sub>-dpk (a, b) and Co<sub>4</sub>O<sub>4</sub>-dpk (c, d) for first order kinetics.
